# Supplementary material for: lesSDRF is more: maximizing the value of proteomics data through streamlined metadata annotation
Source: Nat Commun. 2023 Oct 24;14:6743. doi: 10.1038/s41467-023-42543-5 (PMC10598006; doi:10.1038/s41467-023-42543-5)
Supplement: Supplementary file 3 — Supplementary Data 1 [file 41467_2023_42543_MOESM3_ESM.xlsx]

## Sheet: Blad1
PXD	pubmed id	title	publication-date
PXD006578	29196338	Proteomics and Metabolomics Identify Molecular Mechanisms of Aging Potentially Predisposing for Chronic Lymphocytic Leukemia	2017-12-03
PXD006602	29808012	Switching off IMMP2L signaling drives senescence via simultaneous metabolic alteration and blockage of cell death	2018-05-29
PXD000026	23297349	The Nuclear Protein ALY Binds to and Modulates the Activity of Transcription Factor E2F2	2013-01-09
PXD000030	23754495	Identification of Annexin A1 interacting proteins in chronic myeloid leukemia KCL22 cells	2013-06-12
PXD000072	23640497	High Precision Platelet Releasate Definition by Quantitative Reversed Protein Profiling--Brief Report	2013-05-04
PXD000106	24493364	N-Formyl-7-amino-11-cycloamphilectene, a Marine Sponge Metabolite, Binds to Tubulin and Modulates Microtubule Depolymerization	2014-02-05
PXD000115	24965446	Host Factors That Interact with the Pestivirus N-Terminal Protease, Npro, Are Components of the Ribonucleoprotein Complex	2014-06-27
PXD000157	22068332	The quantitative proteome of a human cell line	2011-11-10
PXD000171	23538226	The Effect of Proteasome Inhibition on theGeneration of the Human Leukocyte Antigen(HLA) Peptidome	2013-03-30
PXD000226	23948706	The Human Uterine Smooth Muscle S-nitrosoproteome Fingerprint in Pregnancy, Labor, and Preterm Labor	2013-08-21
PXD000228	24776597	Quantitative proteomics analysis reveals similar release profiles following specific PAR-1 or PAR-4 stimulation of platelets	2014-04-30
PXD000252	24185622	Granzyme M targets topoisomerase II alpha to trigger cell cycle arrest and caspase-dependent apoptosis	2013-11-05
PXD000385	23394617	Quantitative proteomic analysis of amniocytesreveals potentially dysregulated molecularnetworks in Down syndrome	2013-02-12
PXD000440	24298013	Qualitatively Different T Cell Phenotypic Responses to IL-2 versus IL-15 are Unified by Identical Dependences on Receptor Signal Strength and Duration	2013-12-04
PXD000450	24366607	Increased Diversity of the HLA-B40 Ligandome by the Presentation of Peptides Phosphorylated at Their Main Anchor Residue	2013-12-25
PXD000536	24969177	Proteomic Analysis of the Multimeric Nuclear Egress Complex of Human Cytomegalovirus	2014-06-28
PXD000603	24274035	Proteogenomic Analysis of Human Chromosome 9-Encoded Genes from Human Samples and Lung Cancer Tissues	2013-11-28
PXD000651	25038066	In-depth Characterization of the Cerebrospinal Fluid (CSF) Proteome Displayed Through the CSF Proteome Resource (CSF-PR)	2014-07-20
PXD000653	25038066	In-depth Characterization of the Cerebrospinal Fluid (CSF) Proteome Displayed Through the CSF Proteome Resource (CSF-PR)	2014-07-20
PXD000654	25038066	In-depth Characterization of the Cerebrospinal Fluid (CSF) Proteome Displayed Through the CSF Proteome Resource (CSF-PR)	2014-07-20
PXD000656	25038066	In-depth Characterization of the Cerebrospinal Fluid (CSF) Proteome Displayed Through the CSF Proteome Resource (CSF-PR)	2014-07-20
PXD000688	24699806	A Peptidomic Analysis of Human Milk Digestion in the Infant Stomach Reveals Protein-Specific Degradation Patterns	2014-04-05
PXD000749	25406675	Anatomo-proteomic Characterization of Human Basal Ganglia: Focus on Striatum and Globus Pallidus	2014-11-20
PXD000807	24748380	Quantitative Proteomic Analysis of Oral Brush Biopsies Identifies Secretory Leukocyte Protease Inhibitor as a Promising, Mechanism-Based Oral Cancer Biomarker	2014-04-22
PXD000834	25381060	C-terminomics Screen for natural Substrates of Cytosolic Carboxypeptidase 1 Reveals Processing of Acidic Protein C termini*	2014-11-09
PXD000930	27694331	A Role for Human N-alpha Acetyltransferase 30 (naa30) in Maintaining Mitochondrial Integrity	2016-11-03
PXD000963	26388710	Proteins fromformalin-fixed paraffin-embedded prostate cancer sections thatpredict the risk ofmetastatic disease	2015-09-22
PXD001123	26279304	Oncoprotein ZNF322A Transcriptionally Deregulates Alpha-Adducin, Cyclin D1 and p53 to Promote Tumor Growth and Metastasis in Lung Cancer	2015-08-19
PXD001268	24954659	Maternal Serum Serpin B7 Is Associated With Early Spontaneous Preterm Birth	2014-06-24
PXD001353	25974414	Role of the Tau N-terminal Region in Microtubule Stabilization Revealed by New Endogenous Truncated Forms	2015-05-15
PXD001357	25429530	Direct Evidence of Milk Consumption From Ancient Human Dental Calculus	2014-11-28
PXD001362	25429530	Direct Evidence of Milk Consumption From Ancient Human Dental Calculus	2014-11-28
PXD001402	25271300	Proteome-metabolome Profiling of Ovarian Cancer Ascites Reveals Novel Components Involved in Intercellular Communication	2014-10-02
PXD001425	26086942	Plasma Glycoproteomics Reveals Sepsis Outcomes Linked to Distinct Proteins in Common Pathways	2015-06-19
PXD001524	25505010	Derivation and Characterization of a Cytocompatible Scaffold From Human Testis	2014-12-17
PXD001674	28515092	Human CD62Ldim neutrophils identified as a separate subset byproteome profiling and in vivo pulse-chase labeling	2017-05-19
PXD001838	25717101	Cellular STAT3 functions via PCBP2 to restrain Epstein-Barr Virus lytic activation in B lymphocytes	2015-02-27
PXD002013	26026062	The Tec kinase-regulated phosphoproteome reveals a mechanism for the regulation of inhibitory signals in murine macrophages	2015-05-31
PXD002014	28827734	Integrative epigenomics, transcriptomics and proteomics of patient chondrocytes reveal genes and pathways involved in osteoarthritis	2017-08-23
PXD002041	26110064	Proteomic Analysis of Colon and Rectal Carcinoma Using Standard and Customized Databases	2015-06-26
PXD002046	26110064	Proteomic Analysis of Colon and Rectal Carcinoma Using Standard and Customized Databases	2015-06-26
PXD002050	26110064	Proteomic Analysis of Colon and Rectal Carcinoma Using Standard and Customized Databases	2015-06-26
PXD002080	25043054	Proteogenomic Characterization of Human Colon and Rectal Cancer	2014-07-22
PXD002086	25043054	Proteogenomic Characterization of Human Colon and Rectal Cancer	2014-07-22
PXD002097	27307780	Phosphotyrosine profiling ofcurcumin-induced signaling	2016-06-17
PXD002132	27796319	A dual specificity kinase, DYRK1A, as a potential therapeutic target for head and neck squamous cell carcinoma	2016-11-01
PXD002163	26272980	Proteomic Profiling of Detergent Resistant Membranes (Lipid Rafts) of Prostasomes	2015-08-15
PXD002339	26474164	In-Depth, Label-Free Analysis of theErythrocyte Cytoplasmic Proteome inDiamond Blackfan Anemia Identifies aUnique Inflammatory Signature	2015-10-17
PXD002421	27666543	The lncRna Landscape of Breast Cancer Reveals a Role for DSCAM-AS1 in Breast Cancer Progression	2016-09-27
PXD002437	27155584	Proteome Profiling in Lung Injury Following Hematopoietic Stem Cell Transplantation	2016-05-08
PXD002620	26442468	A Proteomic Glimpse Into Human Ureter Proteome	2015-10-08
PXD002633	26483418	Rosuvastatin Alters the Proteome of High Density Lipoproteins: Generation of alpha-1-antitrypsin Enriched Particles With Anti-inflammatory Properties	2015-10-21
PXD002672	28785034	Bronchoalveolar Lavage Fluid Protein Expression in Acute Respiratory Distress Syndrome Provides Insights into Pathways Activated in Subjects with Different Outcomes	2017-08-09
PXD002725	30116025	Proteomic phenotyping of metastatic melanoma reveals putative signatures of MEK inhibitor response and prognosis	2018-08-18
PXD002736	29038488	MCM2-regulated functional networks in lung cancer by multidimensional proteomic approach.	2017-10-19
PXD002781	27084891	Hepatic Cytochrome P450 Activity, Abundance, and Expression Throughout Human Development	2016-04-17
PXD003014	27037360	Proteomic Analysis Reveals a Novel Mutator S (MutS) Partner Involved in Mismatch Repair Pathway	2016-04-03
PXD003037	26854219	Systemic reprograming of translation efficiencies on oxygen stimulus	2016-02-09
PXD003120	26588988	Down-regulation of LATSkinases alters p53 to promotecell migration	2015-11-22
PXD003200	26742488	Implementation of Meiosis Prophase I Programme Requires a Conserved Retinoid-Independent Stabilizer of Meiotic Transcripts	2016-01-09
PXD003210	27976729	Interactomic analysis of REST/ NRSF and implications of its functional links with the transcription suppressor TRIM28 during neuronal differentiation	2016-12-16
PXD003218	29308009	Discovery and Longitudinal Evaluation of Candidate Biomarkers for Ischaemic Stroke by Mass Spectrometry-Based Proteomics	2018-01-09
PXD003293	27461979	Integrative proteomic analysis reveals reprograming tumor necrosis factor signaling in epithelial mesenchymal transition	2016-07-28
PXD003296	27461979	Integrative proteomic analysis reveals reprograming tumor necrosis factor signaling in epithelial mesenchymal transition	2016-07-28
PXD003297	27461979	Integrative proteomic analysis reveals reprograming tumor necrosis factor signaling in epithelial mesenchymal transition	2016-07-28
PXD003323	27461979	Integrative proteomic analysis reveals reprograming tumor necrosis factor signaling in epithelial mesenchymal transition	2016-07-28
PXD003340	27895531	Follicular fluid biomarkers for human invitro fertilization outcome: Proof ofprinciple	2016-11-30
PXD003362	27727249	microRna-140 Inhibits Inflammation and Stimulates Chondrogenesis in a Model of Interleukin 1?-induced Osteoarthritis	2016-10-12
PXD003408	27025457	Contribution of Human Fibroblasts and Endothelial Cells to the Hallmarks of Inflammation as Determined by Proteome Profiling	2016-03-31
PXD003409	27025457	Contribution of Human Fibroblasts and Endothelial Cells to the Hallmarks of Inflammation as Determined by Proteome Profiling	2016-03-31
PXD003411	27025457	Contribution of Human Fibroblasts and Endothelial Cells to the Hallmarks of Inflammation as Determined by Proteome Profiling	2016-03-31
PXD003413	27025457	Contribution of Human Fibroblasts and Endothelial Cells to the Hallmarks of Inflammation as Determined by Proteome Profiling	2016-03-31
PXD003414	27025457	Contribution of Human Fibroblasts and Endothelial Cells to the Hallmarks of Inflammation as Determined by Proteome Profiling	2016-03-31
PXD003519	29133510	Single Cell Immuno-Laser Microdissection Coupled to Label-Free Proteomics to Reveal the Proteotypes of Human Brain Cells After Ischemia	2017-11-15
PXD003534	26933193	Adjuvant-induced Human Monocyte Secretome Profiles Reveal Adjuvant- And Age-specific Protein Signatures	2016-03-05
PXD003551	26949251	The cell proliferation antigen Ki-67 organises heterochromatin	2016-03-08
PXD003587	30090399	Acetaminophen-induced S-nitrosylation andS-sulfenylation signalling in 3D culturedhepatocarcinoma cell spheroids.	2016-03-02
PXD003651	28396511	Database-augmented Mass Spectrometry Analysis of Exosomes Identifies Claudin 3 as a Putative Prostate Cancer Biomarker	2017-04-12
PXD003666	27535802	MASP-3 is the exclusive profactor D activator in resting blood: the lectin and the alternative complement pathways are fundamentally linked	2016-08-19
PXD003709	27226594	Preferential Phosphorylation on Old Histones During Early Mitosis in Human Cells	2016-05-27
PXD003774	27918545	Warfarin Traps Human Vitamin K Epoxide Reductase in an Intermediate State During Electron Transfer	2016-12-06
PXD004026	27216279	Clickable Glutathione Approach for Identification of Protein Glutathionylation in Response to Glucose Metabolism	2016-05-25
PXD004051	27761513	Insulin Stimulated MCF7 Breast Cancer Cells: Proteome Dataset	2016-10-21
PXD004219	28765563	Quantitative Proteomics of Cerebrospinal Fluid in Paediatric Pneumococcal Meningitis	2017-08-03
PXD004312	30266947	A Mitochondrial Proteome Profile Indicative of Type 2 Diabetes Mellitus in Skeletal Muscles	2018-09-30
PXD004320	27803950	Multi-OMIC pro?ling of survival and metabolic signaling networks in cells subjected to photodynamic therapy	2016-11-03
PXD004334	28246120	KDM3A coordinates actin dynamics with intraflagellar transport to regulate cilia stability	2017-03-02
PXD004443	29599912	Coagulation cascade and complement system in systemic lupus erythematosus	2018-03-31
PXD004588	28112162	Zika virus disrupts molecular fingerprinting of human neurospheres	2017-01-24
PXD004589	30090875	Multi-region proteome analysis quantifies spatialheterogeneity of prostate tissue biomarkers	2018-08-10
PXD004626	27879288	Multi-omics Analysis of Serum Samples Demonstrates Reprogramming of Organ Functions Via Systemic Calcium Mobilization and Platelet Activation in Metastatic Melanoma	2016-11-24
PXD004874	27934856	Bulk cell density and Wnt/TGFbeta signalling regulate mesendodermal patterning of human pluripotent stem cells	2016-12-10
PXD004935	27811184	Coupling an EML4-ALK-centric Interactome With Rna Interference Identifies Sensitizers to ALK Inhibitors	2016-11-05
PXD004987	27841354	Proteomic Characterization of Neuromelanin Granules Isolated From Human Substantia Nigra by Laser-Microdissection	2016-11-15
PXD005013	29156374	Genetic profiling and surface proteome analysis of human atrial stromal cells and rat ventricular epicardium-derived cells reveals novel insights into their cardiogenic potential.	2017-11-21
PXD005073	28674151	Kinase activity ranking using phosphoproteomics data (KARP) quantifies the contribution of protein kinases to the regulation of cell viability	2017-07-05
PXD005090	28493397	A Recurrent De Novo Mutation in ACTG1 Causes Isolated Ocular Coloboma	2017-05-12
PXD005152	28077445	Human Antiviral Protein IFIX Suppresses Viral Gene Expression During Herpes Simplex Virus 1 (HSV-1) Infection and Is Counteracted by Virus-induced Proteasomal Degradation	2017-01-13
PXD005187	28417017	Galectin-1 inhibition attenuates profibrotic signaling in hypoxia-induced pulmonary fibrosis	2017-04-19
PXD005252	29804834	Time-Resolved Analysis Reveals Rapid Dynamics and Broad Scope of the CBP/p300 Acetylome	2018-05-29
PXD005267	28667326	Quantitative Proteomics Analysis of Plasmodium vivax Induced Alterations in Human Serum during the Acute and Convalescent Phases of Infection	2017-07-02
PXD005466	29774096	GSTM3 and GSTP1: novel players driving tumor progression in cervical cancer	2018-05-19
PXD005508	29507054	Targeting CDK2 overcomes melanoma resistance against BRAF and Hsp90 inhibitors	2018-03-07
PXD005613	28159936	Nitration of Tyrosines in Complement Factor H Domains Alters Its Immunological Activity and Mediates a Pathogenic Role in Age Related Macular Degeneration	2017-02-06
PXD005620	28376875	TGFBR2-dependent alterations of exosomal cargo and functions in Dna mismatch repair-deficient HCT116 colorectal cancer cells	2017-04-06
PXD005650	28634120	Highly reproducible improved label-free quantitative analysis of cellular phosphoproteome by optimization of LC-MS/MS gradient and analytical column construction	2017-06-22
PXD005693	29535834	Innovative methodology for the identification of soluble biomarkers in fresh tissues	2018-03-15
PXD005709	29535834	Innovative methodology for the identification of soluble biomarkers in fresh tissues	2018-03-15
PXD006036	28436968	Metabolic Control of Primed Human Pluripotent Stem Cell Fate and Function by the miR-200c-SIRT2 Axis	2017-04-25
PXD006095	29164889	Comparison of Quantitative Mass Spectrometry Platforms for Monitoring Kinase ATP Probe Uptake in Lung Cancer	2017-11-23
PXD006137	28669814	Quick 96FASP for high throughput quantitative proteome analysis	2017-07-04
PXD006176	29880488	Weibel-Palade Body Localized Syntaxin-3 Modulates Von Willebrand Factor Secretion From Endothelial Cells	2018-06-09
PXD006179	jpb.1000447	Differential Quantitative Proteomics of Human Microvascular Endothelial Cells 1 by iTRAQ Reveals Palladin to be a New Biomarker During TGF-?1 Induced Endothelial Mesenchymal Transition	1976-12-04
PXD006386	29880886	The natural compound GL22, isolated from Ganoderma mushrooms, suppresses tumor growth by altering lipid metabolism and triggering cell death	2018-06-09
PXD006672	28816646	Chronic Cigarette Smoke Mediated Global Changes in Lung Mucoepidermoid Cells: A Phosphoproteomic Analysis	2017-08-18
PXD006673	29741735	Widespread epigenomic, transcriptomic andproteomic differences between hip osteophytic andarticular chondrocytes in osteoarthritis	2018-05-10
PXD006687	29176938	A Proteomic Approach to Understanding the Pathogenesis of Idiopathic Macular Hole Formation	2017-11-28
PXD006698	28675297	A Human Tyrosine Phosphatase Interactome Mapped by ProteomicProfiling	2017-07-05
PXD006769	30464169	Integrated Mapping of Pharmacokinetics and Pharmacodynamics in a Patient-Derived Xenograft Model of Glioblastoma	2018-11-23
PXD006788	30127373	STAT3 associates with vacuolar H+-ATPase and regulatescytosolic and lysosomal pH	2018-08-22
PXD006847	29491378	nanodroplet Processing Platform for Deep and Quantitative Proteome Profiling of 10-100 Mammalian Cells	2018-03-02
PXD006856	29581253	naA80 is actin?s N-terminal acetyltransferase and regulates cytoskeleton assembly and cell motility	2018-03-28
PXD006863	29208752	Effects of Alanyl-Glutamine Treatment on the Peritoneal Dialysis Effluent Proteome Reveal Pathomechanism-Associated Molecular Signatures	2017-12-07
PXD006998	30535373	Human leukemia cells (HL-60) proteomic and biological signatures underpinning cryo-damage are differentially modulated by novel cryo-additives	2018-12-12
PXD007081	30038331	Urine-derived cells: a promising diagnostic tool in Fabry disease patients	2018-07-25
PXD007083	30116025	Proteomic phenotyping of metastatic melanoma reveals putative signatures of MEK inhibitor response and prognosis	2018-08-18
PXD007103	29961565	Endogenous Cell Type-Specific DISC1 Interactomes Reveal Protein Networks Associated to Neurodevelopmental Disorders	2018-07-03
PXD007123	29980616	Decreased naD Activates STAT3 and Integrin Pathways to Drive Epithelial-Mesenchymal Transition	2018-07-08
PXD007130	30057262	Recapitulation of Human Neural Microenvironment Signatures in iPSC-Derived NPC 3D Differentiation	2018-07-31
PXD007134	29158831	Identification and Validation of a Salivary Protein Panel to Detect Heart Failure Early	2017-11-22
PXD007234	30036086	Menstrual fluid factors facilitate tissue repair: identification and functional action in endometrial and skin repair	2018-07-24
PXD007543	29032073	A Compendium of Co-regulated Protein Complexesin Breast Cancer Reveals Collateral Loss Events	2017-10-17
PXD007575	28988947	Multiplexed Thiol Reactivity Profiling for Target Discovery of Electrophilic natural Products	2017-10-11
PXD007592	29541007	Proteomics-based Insights Into Mitogen-Activated Protein Kinase Inhibitor Resistance of Cerebral Melanoma Metastases	2018-03-16
PXD007675	29955062	Molecular basis of Tousled-Like Kinase 2 activation	2018-06-30
PXD007726	29721084	A novel USP9X substrate TTK contributes to tumorigenesis in non-small-cell lung cancer	2018-05-04
PXD007740	29970458	A System-wide Approach to MonitorResponses to Synergistic BRAF and EGFRInhibition in Colorectal Cancer Cells	2018-07-05
PXD007744	29752063	Proteomic Analyses of Human Regulatory T Cells Reveal Adaptations in Signaling Pathways That Protect Cellular Identity	2018-05-13
PXD007809	29980615	Influenza A Virus Induces AutophagosomalTargeting of Ribosomal Proteins	2018-07-08
PXD007890	29358341	Temporal Effects of Combined Birinapant and Paclitaxel on Pancreatic Cancer Cells Investigated via Large-Scale, Ion-CurrentBased Quantitative Proteomics (IonStar)	2018-01-24
PXD007898	29669735	CTGF/VEGFA-activated Fibroblasts Promote Tumor Migration Through Micro-environmental Modulation	2018-04-20
PXD008014	29720545	Multifocal demyelinating motor neuropathy and hamartoma syndrome associated with a de novo PTEN mutation	2018-05-04
PXD008022	30123426	Spatial and temporal proteome dynamics of glioma cells during oncolytic adenovirus Delta-24-RGD infection	2018-08-21
PXD008033	30279501	Cell cycle-resolved chromatin proteomics reveals the extent of mitotic preservation of the genomic regulatory landscape	2018-10-04
PXD008131	30143613	The dual methyltransferase METTL13 targets N terminus and Lys55 of eEF1A and modulates codon-specific translation rates	2018-08-26
PXD008252	30228939	Nidogen-1 is a novel extracellular ligand for the NKp44 activating receptor	2018-09-20
PXD008310	29348145	FBXL13 Directs the Proteolysis of CEP192 to Regulate Centrosome Homeostasis and Cell Migration	2018-01-20
PXD008445	29961760	Patients with early-stage oropharyngeal cancer can beidentified with label-free serum proteomics	2018-07-03
PXD008454	29967110	Adaptive Resistance to EGFR-Targeted Therapy by Calcium Signaling in NSCLC Cells	2018-07-04
PXD008570	30410026	HLA-B57 micropolymorphism defines thesequence and conformational breadth of theimmunopeptidome	2018-11-10
PXD008581	29467285	Angiogenic Patterning by STEEL, an Endothelial-Enriched Long Noncoding Rna	2018-02-23
PXD008584	30326427	Synthetic Circular Rna Functions as a miR-21Sponge to Suppress Gastric CarcinomaCell Proliferation	2018-10-17
PXD008723	29719595	Proteomic alterations in early stage cervical cancer	2018-05-03
PXD008788	30141943	Determining Allele-Specific Protein Expression (ASPE) Using a Novel QconCAT-Based Proteomics Method	2018-08-25
PXD008821	30072576	Co-regulatory networks of human serum proteins link genetics to disease	2018-08-04
PXD008870	30100563	Intestinal Metaproteomics Reveals Host-Microbiota Interactions in Subjects at Risk for Type 1 Diabetes	2018-08-14
PXD008896	29511296	Characterization of gene regulation and protein interaction networks for Matrin 3 encoding mutations linked to amyotrophic lateral sclerosis and myopathy.	2018-03-08
PXD008925	30001349	Radio-sensitizing effects of VE-821 andbeyond: Distinct phosphoproteomic andmetabolomic changes after ATR inhibition inirradiated MOLT-4 cellsRadio-sensitizing effects of VE-821 and beyond: Distinct phosphoproteomic and metabolomic changes after ATR inhibition in irradiated MOLT-4 cells	2018-07-13
PXD008980	30252905	Time-resolved proteomics of adenovirus infected cells	2018-09-27
PXD008996	30054545	Deoxynivalenol induces structural alterations in epidermoid carcinoma cells A431 and impairs the response to biomechanical stimulation	2018-07-29
PXD009024	30076174	Non-muscle myosin II drives vesicle loss during human reticulocyte maturation	2018-08-05
PXD009074	29599781	Extracellular Vesicle Subtypes Released From Activated or Apoptotic T-Lymphocytes Carry a Specific and Stimulus-Dependent Protein Cargo	2018-03-31
PXD009095	29955062	Molecular basis of Tousled-Like Kinase 2 activation	2018-06-30
PXD009149	30114907	An Integrated, High-Throughput Strategy for Multiomic Systems Level Analysis	2018-08-18
PXD009172	30510230	Olfactory cleft proteome does not refect olfactory performance in patients with idiopathic and postinfectious olfactory disorder: A pilot study	2018-12-05
PXD009196	30093357	Exercise-induced Molecular Mechanisms Promoting Glycogen Supercompensation in Human Skeletal Muscle	2018-08-11
PXD009203	30770125	Integrated Fourier Transform Infrared Imaging and Proteomics for Identification of a Candidate Histochemical Biomarker in Bladder Cancer	2019-02-17
PXD009216	29735996	C-BERST: Defining subnuclear proteomic landscapes at genomic elements with dCas9-APEX2	2018-05-08
PXD009234	30140170	Global phosphoproteomic analysis identifies SRMS-regulated secondary signaling intermediates	2018-08-25
PXD009251	30333727	Comparative Hippocampal SynapticProteomes of Rodents andPrimates: Differences inNeuroplasticity-Related Proteins	2018-10-20
PXD009303	29774096	GSTM3 and GSTP1: novel players driving tumor progression in cervical cancer	2018-05-19
PXD009333	29858230	Secretory Kinase Fam20C Tunes Endoplasmic Reticulum Redox State via Phosphorylation of Ero1?	2018-06-03
PXD009338	29777171	MLL-fusion-driven Leukemia Requires SETD2 to Safeguard Genomic Integrity	2018-05-20
PXD009343	29922247	Proteomic Analysis of Zika Virus Infected Primary Human Fetal Neural Progenitors Suggests a Role for Doublecortin in the Pathological Consequences of Infection in the Cortex	2018-06-21
PXD009350	30451909	Obesity Shows Preserved Plasma Proteome in Large Independent Clinical Cohorts	2018-11-20
PXD009367	30114907	An Integrated, High-Throughput Strategy for Multiomic Systems Level Analysis	2018-08-18
PXD009396	30327373	Absolute proteome quanti?cation of highly puri?ed populations of circulating reticulocytes and mature erythrocytes	2018-10-18
PXD009409	30279523	The evolutionary conserved FOXJ1 target gene Fam183b is essential for motile cilia in Xenopus but dispensable for ciliary function in mice	2018-10-04
PXD009453	29593093	TAILS N-terminomics and proteomics reveal complexregulation of proteolytic cleavage by O-glycosylation	2018-03-30
PXD009487	30281021	Changes in mRna abundance drive shuttling of Rna binding proteins, linking cytoplasmic Rna degradation to transcription.	2018-10-04
PXD009495	29980614	Thermal proteome profiling in bacteria: probing protein state in vivo	2018-07-08
PXD009499	29844425	The RPAP3-Cterminal Domain Identifies R2TP-like Quaternary Chaperones	2018-05-31
PXD009520	29844425	The RPAP3-Cterminal domain identifies R2TP-like quaternary chaperones	2018-05-31
PXD009645	29946125	Revealing the immune perturbation of black phosphorus nanomaterials to macrophages by understanding the protein corona	2018-06-28
PXD009656	29880867	Alternative assembly of respiratory complex II connects energy stress to metabolic checkpoints	2018-06-09
PXD009681	29921876	Nuclear PTEN Safeguards pre-mRna Splicing to Link Golgi Apparatus for Its Tumor Suppressive Role	2018-06-21
PXD009724	30026309	Small molecule inhibitors reveal an indispensable scaffolding role of RIPK2 in NOD2 signaling	2018-07-22
PXD009738	29786170	Immunopeptidomic Profiling of HLA-A2-Positive Triple Negative Breast Cancer Identifies Potential Immunotherapy Target Antigens	2018-05-23
PXD009747	29858227	Centrosomal ALIX Regulates Mitotic Spindle Orientation by Modulating Astral Microtubule Dynamics	2018-06-03
PXD009759	30022074	A complex of C9ORF72 and p62 uses arginine methylation to eliminate stress granules by autophagy	2018-07-20
PXD009830	30022119	Shieldin Complex Promotes Dna End-Joining and Counters Homologous Recombination in BRCA1-na Cells	2018-07-20
PXD009838	29915148	Stable Isotope Dynamic Labeling ofSecretomes (SIDLS) Identifies AuthenticSecretory Proteins Released by Cancer andStromal Cells	2018-06-20
PXD009868	30042207	during Translational Arrest	2018-07-26
PXD009870	30132266	LXR/RXR signaling andneutrophil phenotype followingmyocardial infarction classify sex differences inremodeling	2018-08-23
PXD009880	30391543	Deficiency of the mitochondrial sulfide regulator ETHE1 disturbs cellgrowth, glutathione level and causes proteome alterations outsidemitochondria	2018-11-06
PXD009897	29991651	IKK Promotes Cytokine-Induced and Cancer-Associated AMPK Activity and Attenuates Phenformin-Induced Cell Death in LKB1Deficient Cell	2018-07-12
PXD009914	30143613	The Dual Methyltransferase METTL13 Targets N Terminus and Lys55 of eEF1A and Modulates Codon-Specific Translation Rates	2018-08-26
PXD009933	30497457	Proteomic profiling of senescent human diploid fibroblasts treated with gammatocotrienol	2018-12-01
PXD009969	30030424	Abnormal Rna stability in amyotrophic lateral sclerosis	2018-07-22
PXD010012	30385480	Online Parallel Accumulation?Serial Fragmentation (PASEF) with a Novel Trapped Ion Mobility Mass Spectrometer	2018-11-06
PXD010155	30327431	Probing the contribution of individual polypeptideGalnac-transferase isoforms to the O-glycoproteome byinducible expression in isogenic cell lines	2018-10-18
PXD010223	30010936	ATR-mediated proteome remodeling is a major determinant of homologous recombination capacity in cancer cells.	2018-07-17
PXD010312	29895970	TRPS1 regulates estrogen-receptor binding and histone acetylation at enhancers	2018-06-14
PXD010361	30190327	Plasma membrane profiling during enterohemorrhagic E.coli infection reveals that the metalloprotease StcE cleaves CD55 from host epithelial surfaces	2018-09-08
PXD010398	30320547	Dynein-2 intermediate chains play crucial but distinct roles in primary cilia formation and function	2018-10-16
PXD010417	30067223	Thalidomide promotes degradation of SALL4, a transcription factor implicated in Duane Radial Ray syndrome	2018-08-02
PXD010418	30067223	Thalidomide promotes degradation ofSALL4, a transcription factor implicated inDuane Radial Ray syndrome	2018-08-02
PXD010420	30067223	Thalidomide promotes degradation ofSALL4, a transcription factor implicated inDuane Radial Ray syndrome	2018-08-02
PXD010516	30269983	Mechanisms Preserving Insulin Action during HighDietary Fat Intake	2018-10-03
PXD010538	30368041	Nitric oxide contributes to protein homeostasis by S-nitrosylations of the chaperone HSPA8 and the ubiquitin ligase UBE2D	2018-10-28
PXD010634	30341083	Whole Proteome Profiling of N-Myristoyltransferase Activity and Inhibition Using Sortase A	2018-10-21
PXD010737	30257202	?-TrCP- and Casein Kinase II-Mediated Degradation of Cyclin F Controls Timely Mitotic Progression	2018-09-27
PXD010786	30217950	Functional Proteomics and Deep Network Interrogation Reveal a Complex Mechanism of Action of Midostaurin in Lung Cancer Cells	2018-09-16
PXD010870	30242148	Gap junction protein Connexin-43 is a directtranscriptional regulator of N-cadherin in vivo	2018-09-23
PXD011042	30406044	Proteomic Pro?ling of Burkholderia thailandensis During Host Infection Using Bio-Orthogonal Noncanonical Amino Acid Tagging (BONCAT)	2018-11-09
PXD011058	30356100	Nuclear lactate dehydrogenase A senses ROS to produce ?-hydroxybutyrate for HPV-induced cervical tumor growth	2018-10-26
PXD011118	30348809	A novel germline variant in CSF3R reduces N-glycosylation and exerts potent oncogenic effects in leukemia	2018-10-24
PXD011126	30375385	M-Phase Phosphoprotein 9 regulates ciliogenesis by modulating CP110-CEP97 complex localization at the mother centriole	2018-10-31
PXD011175	30532160	Automated phosphopeptide enrichmentfrom minute quantities of frozen malignantmelanoma tissue	2018-12-12
PXD011187	30459281	Phosphoproteome and gene expression profiling of ALK inhibition in neuroblastoma cell lines reveals conserved oncogenic pathways	2018-11-22
PXD011309	30340394	Identi?cation of Potential Plasma Biomarkers for Abdominal Aortic Aneurysm Using Tandem Mass Tag Quantitative Proteomics	2018-10-21
PXD011456	30846556	Global analysis of methionine oxidation provides acensus of folding stabilities for the human proteome	2019-03-09
PXD011755	30513899	Comparison of Two Solid-Phase Extraction (SPE)Methods for the Identification and Quantificationof Porcine Retinal Protein Markers by LC-MS/MS	2018-12-06
PXD000218	24648465	Cross-species Proteomics Reveals Specific Modulation of Signaling in Cancer and Stromal Cells by Phosphoinositide 3-kinase (PI3K) Inhibitors	2014-03-22
PXD000760	26628894	Hepatocytes Respond Differently to Major Dietary Trans Fatty Acid Isomers, Elaidic Acid and Trans-Vaccenic Acid	2015-12-03
PXD001118	25167464	Evaluation of Proteomic Search Engines for the Analysis of Histone Modi?cations	2014-08-29
PXD003271	27128972	Proteo transcriptomic Analysis Reveals Stage Specific Changesinthe Molecular Landscape of Clear-Cell Renal Cell Carcinoma [Individual Sample];Proteo transcriptomic Analysis Reveals Stage Specific Changesinthe Molecular Landscape of Clear-Cell Renal Cell Carcinoma [Pooled Sample]	2016-04-30
PXD003594	27991931	Oxidative stress downstream of mTORC1 but not AKT causes a proliferative defect in cancer cells resistant to PI3K inhibition	2016-12-20
PXD005292	28287265	Glycoproteins in Claudin-Low Breast Cancer Cell Lines Have a Unique Expression Profile	2017-03-14
PXD005755	29079528	Increased serotransferrin and ceruloplasmin turnover in diet-controlled patients with type 2 diabetes	2017-10-29
PXD006607	30205043	Aberrant ERBB4-SRC Signaling as a Hallmarkof Group 4 Medulloblastoma Revealedby Integrative Phosphoproteomic Profiling;"Aberrant ERBB4-SRC Signaling as a Hallmarkof Group 4 Medulloblastoma Revealedby Integrative Phosphoproteomic Profiling"	2018-09-12
PXD006996	29752379	Rapid Remodeling of the Host Epithelial CellProteome by the Listeriolysin O (LLO)Pore-forming Toxin	2018-05-13
PXD007137	28991240	Polypharmacology-based ceritinib repurposing using integrated functional proteomics	2017-10-11
PXD008012	30158526	In vivo phosphoproteomics reveals kinase activityprofiles that predict treatment outcome in triplenegative breast cancer;"In vivo phosphoproteomics reveals kinase activityprofiles that predict treatment outcome in triplenegative breast cancer"	2018-08-31
PXD008513	29449567	Systematic analysis of protein turnover in primary cells	2018-02-17
PXD008516	29449567	Systematic Analysis of Protein Turnover in Primary Cells	2018-02-17
PXD008720	30068331	Species comparison of liver proteomes reveals links to naked mole-rat longevity and human aging	2018-08-03
PXD009603	30051838	Proteomic evidence of dietary sourcesin ancient dental calculus	2018-07-28
PXD009707	30311792	Candidate Treponema pallidum biomarkersuncovered in urine from individuals withsyphilis using mass spectrometry	2018-10-13
PXD010103	30262884	AP-4 vesicles contribute to spatial control of autophagy via RUSC-dependent peripheral delivery of ATG9A	2018-09-29
PXD010787	30217950	Functional Proteomics and Deep Network Interrogation Reveal a Complex Mechanism of Action of Midostaurin in Lung Cancer Cells	2018-09-16
