# Supplementary material for: lesSDRF is more: maximizing the value of proteomics data through streamlined metadata annotation
Source: Nat Commun. 2023 Oct 24;14:6743. doi: 10.1038/s41467-023-42543-5 (PMC10598006; doi:10.1038/s41467-023-42543-5)
Supplement: Supplementary file 4 — Supplementary Data 2 [file 41467_2023_42543_MOESM4_ESM.xlsx]

## Sheet: Blad1
pride_accession	pubmed_id	article_name	species_name	species_ontology	tissue_cell_line	tissue_ontology	cell_line_ontology	labelling_name	labelling_ontology	enzyme_name	enzyme_ontology	no_missed_cleavages	precursor_mass_tolerance_ppm	fragment_ion_mass_tolerance_da	precursor_mass_tolerance_original	fragment_ion_mass_tolerance_original	variable_modification_name	variable_modification_ontology	fixed_modification_name	fixed_modification_ontology	experiment_name	experiment_ontology	instrument_name	instrument_ontology	fragmentation_type_name	description	keywords	comment	multiple_projects	open_access	pride_search_settings	cross_link	retracted_paper	synthetic_peptide_used.	multiple_experiments
PXD006578	29196338	Proteomics and Metabolomics Identify Molecular Mechanisms of Aging Potentially Predisposing for Chronic Lymphocytic Leukemia	Human(Homo sapiens)[9606]	NCBITaxon:9606	blood	BTO:0000089	na	na	na	Trypsin/P	MS:1001313	2	50	0.1	50 ppm	100mmu	oxidation(methionine),acetylation(N-terminal protein)	35#M,1#N-term(Protein)/1#C-term(Protein) UNCLEAR	carbamidomethylation (Cysteine)	4#C	shotgun proteomics	PRIDE:0000429	Dionex UltiMate 3000 RSLCnano LC system connected to a Q Exactive Orbitrap MS via a nanospray ion source	MS:1000449	na	In B-CLL cells, some remarkable unique features like theloss of tumor suppressor molecules PNN and JARID2, thestress-related serotonin transporter SLC6A4, and high expressionof ZNF207, CCDC88A, PIGR and ID3, otherwiseassociated with stem cell phenotype, were determined.	leukemia,serotonin	Multiple project/Mascot 2.5	PXD006570,PXD006572,PXD006576,PXD006578,PXD006589,PXD006591	yes	no	no	no	yes	no
PXD006602	29808012	Switching off IMMP2L signaling drives senescence via simultaneous metabolic alteration and blockage of cell death	Human(Homo sapiens)[9606]	NCBITaxon:9606	IMR-90 fetal lung fibroblasts, HeLa and HEK293T cells,Normal Human Bronchial Epithelial Cells(NHBE)	na	EFO:0001184,EFO:0001185,EFO:0002869,BTO:0002924	SILAC	MS:1002611	trypsin	MS:1001251	2	20	0.5	20 ppm	0.5Da	oxidation (methionine),acetylation (N-terminal protein)	35#M,1#N-term(Protein),36#K,36#N-term(Protein),188#R,188#K	Carbamidomethylation (Cysteine)	4#C	na	na	Orbitrap Fusion mass spectrometer equipped with an EASY-nLC 1000 ultra-high pressure liquid chromatography(HPLC)system	MS:1002732	HCD	we revealed that switching off the specific mitochondrial processing machinery involving the peptidase IMMP2L serves as the foundation of the senescence program, which was also observed during the mammalian aging process.	phospholipid,IMMP2L,	search parameters taken from Andromeda search engine with Max Quarant software	no	yes	no	no	no	no	no
PXD000026	23297349	The Nuclear Protein ALY Binds to and Modulates the Activity of Transcription Factor E2F2	Human(Homo sapiens)[9606]	NCBITaxon:9606	embryonic kidney 293T cells (HEK293T)	na	EFO:0001184	na	na	Trypsin	MS:1001251	1	100	0.2	100 ppm	0.2Da	Oxidation (methionine)	35#M	Carbamidomethylation (cysteine)	4#C	na	na	Q-TOF micro mass spectrometer	MS:1000189	na	We show that ALY influences the expression of more than 400 genes, including 98 genes bearing consensus E2F motifs.	Affinity purification coupled to MS analysis, oligoprecipitation	na	no	yes	no	no	no	no	no
PXD000030	23754495	Identification of Annexin A1 interacting proteins in chronic myeloid leukemia KCL22 cells	Human (Homo sapiens) [9606]	NCBITaxon:9606	KCL22S,KCL22R cells	na	BTO:0004137	na	na	trypsin	MS:1001251	1	400	0.6	400 ppm	0.6Da	Scarbamidomethyl(cysteines), unmodified( N- and C-terminal),oxidation (methionine)putative (Gln,pyroGlu)	35#M, 35#M,28#Q	Scarbamidomethyl(cysteines), unmodified( N- and C-terminal),oxidation (methionine)putative (Gln,pyroGlu)	35#M,35#M,28#Q	bottom-up proteomics	PRIDE:0000428	na	na	na	In this article, we used a functional proteomic approach to identify Annexin A1 (Anxa1) interacting proteins in the Philadelphia-positive KCL22 cell line.	Annexin A1,Chronic myeloid leukemia, Imatinib resistance,Protein interaction	algorithm that is far more stringent than MASCOT, hence these peptides were considered to be highly confident, post translational modification not well defined	no	yes	no	no	no	no	no
PXD000072	23640497	High Precision Platelet Releasate Definition by Quantitative Reversed Protein Profiling--Brief Report	Human(Homo sapiens)[9606]	NCBITaxon:9606	Blood(Platelets)	BTO:0000089	na	stable isotope dimethyl label	PRIDE:0000513	semi-trypsin	NCIT:C84232	2	50	na	50 ppm	na	oxidation (methionine),dimethyl light and intermediate (N-terminal, lysine)	35#M,36#N-term,36#K,1291#N-term,1291#K	Carbamidomethylation (Cysteine)	4#C	Bottom-up	PRIDE:0000428	LTQ Orbitrap Velos	MS:1001742	HCD, ETD-IT, ETD-FT	we present a reversed releasate proteomics approach to determine unambiguously and quantitatively proteins released from activated platelets	mass spectrometry; platelet; platelet activation; proteomics.	0.6 Da for ETD-IT, 0.05 Da for HCD and ETD-FT	no	yes	no	no	no	no	no
PXD000106	24493364	N-Formyl-7-amino-11-cycloamphilectene, a Marine Sponge Metabolite, Binds to Tubulin and Modulates Microtubule Depolymerization	Human(Homo sapiens)[9606]	NCBITaxon:9606	HeLa cells	BTO:0000567	na	na	na	trypsin	MS:1001303	2	80	0.8	80 ppm	0.8 Da	oxidation (Methionine),phosphorylation (Serine,Threonine)	35#M,21#S,21#T	Carbamidomethylation (Cysteine)	4#C	na	na	Q-TOF Premier mass spectrometer	MS:1000632	na	we describe the application of MS-based chemical proteomics to determine the biological partner(s) of N-formyl-7-amino-11-cycloamphilectene (CALe, Fig. 1), a marine diterpene isolated from the Vanuatu sponge Axinella sp.	Mascot search engine,Chemical Proteomics, in situ digestion.	na	no	yes	no	no	no	no	no
PXD000115	24965446	Host Factors That Interact with the Pestivirus N-Terminal Protease, Npro, Are Components of the Ribonucleoprotein Complex	Human (Homo sapiens)[9606], E.coli (Echerichia coli) [562]	NCBITaxon:9606,NCBITaxon:562	HEK-293(human embryonic kidney) cells	na	CLO:0001230	na	na	trypsin/P	MS:1001313	2	6	0.6	6 ppm	0.6 Da	oxidation (methionine), acetylation (protein N-terminal)	35#M,1#N-term(Protein)	carbamidomethylation (cysteine)	4#C	na	na	orbitrap-ion trap parallel mode	MS:1000484	CID (collision induced dissociation)	Here we used mass spectrometry to identify a new role for N pro through its interaction with over 55 associated proteins, mainly ribosomal proteins and ribonucleoproteins, including Rna helicaseA (DHX9), Y-box binding protein (YBX1), DDX3, DDX5, eIF3 , IGF2BP1 , multiple myeloma tumor protein2 , interleukin enhancer binding factor3 (IEBP3), guanine nucleotide binding protein3, and polyadenylate -…	Pestivirus N-Terminal Protease, Ribonucleoprotein Complex, Flavivirus family	na	no	yes	no	no	no	no	no
PXD000157	22068332	The quantitative proteome of a human cell line	Human (Homo sapiens) [9606]	NCBITaxon:9606	U2OS	na	CLO:0009454	heavy isotope labelled	PRIDE:0000310	trypsin	MS:1001251	2	15	0.8	15 ppm	0.8 Da	oxidation (methionine), 13C615N2 (lysine), 13C615N4 (arginine)	35#M,259#K,267#R	carbamidomethylation(cysteine)	4#C	Bottom-up proteomics	PRIDE:0000428	East-nLC/orbitrap velos	MS:1001742	na	we provide a quantitative description of the proteome of a commonlyused human cell line in two functional states, interphase and mitosis. We show that these humancultured cells express at least B10 000 proteins and that the quantified proteins span aconcentration range of seven orders of magnitude up to 20 000 000 copies per cell. We discusshow protein abundance is linked to function and evolutio…	tandem ms, ptms U2OS	na	no	yes	no	no	no	no	no
PXD000171	23538226	The Effect of Proteasome Inhibition on theGeneration of the Human Leukocyte Antigen(HLA) Peptidome	Human(Homo sapiens)[9606]	NCBITaxon:9606	cancer cell	na	EFO:0001639	SILAC	MS:1002611	trypsin	MS:1001251	2	6	0.5	6 ppm	0.5Da	oxidation(methionine) Acetylation(N-terminal)	35#M,1#N-term	carbamidomethylation(cysteine)	4#C	AP-MS	PRIDE:0000431	Orbitrap XL	MS:1000556	CID	In this article,We evaluated the effects of proteasome inhibitors, epoxomicin and bortezomib, on human cultured cancer cells.	tandem ms	search setting for maxquant is mentioned here	no	yes	no	no	no	no	no
PXD000226	23948706	The Human Uterine Smooth Muscle S-nitrosoproteome Fingerprint in Pregnancy, Labor, and Preterm Labor	Human(Homo sapiens)[9606]	NCBITaxon:9606	uterine myometrial	BTO:0004519	na	na	na	trypsin	NCIT:C84232	na	10	1.00	10 ppm	1.00Da	Oxidation (methionine),iodoacetamide(cysteine),n-ethylmaleimide(cysteine)	35#M,4#C,108#C	na	na	na	na	Thermo Finnigan LTQOrbitrap using Xcalibur	MS:1000693	CID	S-nitrosation is a likely mechanism to explain cGMP-independent relaxation to nitric oxide	S-nitrosation; human pregnancy; labor; myometrium; nitric oxide; preterm labor; smooth muscle; uterus.	na	no	yes	no	no	no	no	no
PXD000228	24776597	Quantitative proteomics analysis reveals similar release profiles following specific PAR-1 or PAR-4 stimulation of platelets	Human(Homo sapiens)[9606]	NCBITaxon:9606	blood	BTO:0000089	na	dimethyl	PRIDE:0000513	trypsin	MS:1001251	2	na	na	na	na	Oxidation (methionine), Phosphorylation (Lysine,N-terminal),Light , intermediate and heavy, dimethyl label ( Lysine, N-terminal)	35#M,21#K,21#N-term,36#K,36#N-term,1291#N-term,1291#K	Carbamidomethylation (Cysteine)	4#C	na	na	LTQ-Orbitrap Velos instrument	MS:1001742	HCD, ion trap electron transfer dissociation,and FT electron transfer dissociation	Both ELISA on established a-granule proteins and MS-based quantitative proteomics showed that the most abundant agranuleproteins are released in similar quantities from platelets after stimulation with either PAR-1 or PAR-4. Our findingsprovide evidence against the hypothesis that PAR-1 and PAR-4 stimulation of platelets trigger differential release ofalpha-granule, but further studies are needed…	Quantitative proteomics, Platelets,Thrombosis,Protease-activated receptor,Releasate	na	no	yes	no	no	no	no	no
PXD000252	24185622	Granzyme M targets topoisomerase II alpha to trigger cell cycle arrest and caspase-dependent apoptosis	Human (Homo sapiens) [9606]	NCBITaxon:9606	HeLa cells, Cos7 cells	na	CLO:0003684,BTO:0000298	SILAC	MS:1002611	trypsin	MS:1001251	1	10	0.5	10 ppm	0.5 Da	(N-terminal) Gln->pyroGlu, trideutero-acetylation (N-terminal),	28#Q(N-term),1#N-term	trideutero-acetylation (lysine), carbamidomethylation (cysteine), oxidation (methionine)	1#K,4#C,35#M	na	na	LTQ Orbitrap XL	MS:1000556	na	Here, we show that GrM?induced cell death was largely caspase-dependent with various hallmarks of classical apoptosis, coinciding with caspase?independent G2/M cell cycle arrest. Using positional proteomics in human tumor cells, we identified the nuclear enzyme topoisomerase II alpha (topoIIa) as a physiological substrate of GrM. Cleavage of topoIIa by GrM at Leu1280 separated topoIIa functional …	granzyme M, cell cycle arrest, topoisomerase II alpha, protease, apoptosis	na	no	yes	no	no	no	no	no
PXD000385	23394617	Quantitative proteomic analysis of amniocytesreveals potentially dysregulated molecularnetworks in Down syndrome	Human (Homo sapiens) [9606]	NCBITaxon:9606	amniotic fluid cells (T21 amniocyte , CN amniocyte samples)	BTO:0000068	na	SILAC	MS:1002611	trypsin	MS:1001251	1	20	0.5	20 ppm	0.5Da	oxidation(methionine),acetylation(protein N-terminal)	35#M,1#N-term(Protein)	carbamidomethylation(cysteine)	4#C	na	na	LTQ orbitrap XL coupled online to the HPLC	MS:1000556	na	In this article, we hypothesizethat relative quantification of proteins produced from trisomy and euploid (chromosomally normal) amniocytes willreveal dysregulated molecular pathways.Chromosomally normal- and Trisomy 21-amniocytes were quantitatively analyzed by using Stable IsotopeLabeling of Amino acids in Cell culture and tandem mass spectrometry,The most extensive proteome of amniocytes and a…	Down syndrome, Trisomy 21, Amniocyte, Amniotic fluid cells, Quantitative proteomics	XCalibur software ver. 2.0.7 (Thermo Fisher Scientific, UK) was used for data acquisition. Mass spectra were analyzed using MaxQuant software	no	yes	no	no	no	no	no
PXD000440	24298013	Qualitatively Different T Cell Phenotypic Responses to IL-2 versus IL-15 are Unified by Identical Dependences on Receptor Signal Strength and Duration	Human (Homo sapiens)[9606]	NCBITaxon:9606	Peripheral blood mononuclear cells (PBMCs)	na	CL:2000001	iTRAQ	PRIDE:0000313	Trypsin	MS:1001251	1	10	0.8	10 ppm	0.8Da	Oxidation (methionine), Phosphorylation (serine, threonine, tyrosine)	35#M,21#S,21#T,21#Y	Carbamidomethylation (cysteine), iTRAQ 8plex (lysine, peptide N-terminal)	4#C,730#K,730#N-term	Phosphotyrosine Enrichment	PRIDE:0000587	Orbitrap Elite mass spectrometer	MS:1001910	HCD	This study revealed that the signaling networks activated by IL-2 or IL-15 are highly similar and that T cell proliferation and metabolism are controlled in a quantitatively.	Phosphotyrosine Data analysis, r iTRAQ quantification	na	no	yes	no	no	no	no	no
PXD000450	24366607	Increased Diversity of the HLA-B40 Ligandome by the Presentation of Peptides Phosphorylated at Their Main Anchor Residue	Human (Homo sapiens) [9606]	NCBITaxon:9606	(C1R) human lymphoid cell line	na	BTO:0003699	na	na	na	na	na	15	25	15 ppm	25 mDa	phosphorylation (serine, threonine, tyrosine), oxidation (methionine), Gln-> N-terminal pyroGlu	21#S,21#T,21#Y,35#M,28#Q(N-term)	na	na	phosphopeptide enrichment	PRIDE:0000588,PRIDE:0000587	electrospray ionization quadrupole TOF	MS:1000189	CID (collision induced dissociation)	we identified more than 2000 unique ligands bound to HLA-B40. Sequence analysisrevealedtwomajoranchormotifs:asparticorglutamic acid at peptide position 2 (P2) and methionine, phenylalanine, or aliphatic residues at the C terminus. The use of immobilized metal ion and TiO2 affinity chromatography allowed the characterization of 85 phosphorylated ligands. We further confirmed every sequence belongi…	HLA-B40 Ligandome, Anchor Residue, Human leukocyte antigen (HLA), Major histocompatibility complex (MHC) class 1	na	no	yes	no	no	no	yes	no
PXD000536	24969177	Proteomic Analysis of the Multimeric Nuclear Egress Complex of Human Cytomegalovirus	Human (Homo sapiens) [9606], HHV-5 (Human cytomegalovirus (strain AD169)) [10360]	NCBITaxon:9606,NCBITaxon:10360	human foreskin fibroblasts (HFFs)	BTO:0004784	na	na	na	trypsin/P	MS:1001313	2	10	0.6	10 ppm	0.6 Da	acetylation (N-terminal), oxidation (methionine), deamidation (asparagine, glutamine)	1#N-term,35#M,7#Q,7#N	carbamidomethylation (cysteine)	4#C	bottom-up	PRIDE:0000428	LTQ Orbitrap Velos Pro	MS:1001742	CID (collision induced dissociation)	In order to characterize further the viral and cellular protein content of the multimeric NEC, the native complex was isolated from HCMV-infected human primary fibroblasts at various time points and analyzed using quantitative proteomics. Previously postulated components of the HCMVspecific NEC, as well as novel potential NEC-associated proteins such as emerin, were identified. In this regard, in…	HCMV (human cytomegalovirus), coimmunoprecipitation (CoIP), nuclear egress complex	na	no	yes	no	no	no	no	no
PXD000603	24274035	Proteogenomic Analysis of Human Chromosome 9-Encoded Genes from Human Samples and Lung Cancer Tissues	Human (Homo sapiens) [9606]	NCBITaxon:9606	Lung cancer tissues and adjacent normal lung tissues	DOID:1324,BTO:0000763	na	na	na	trypsin	MS:1001251	na	na	na	na	na	na	na	na	na	bottom-up proteomics	PRIDE:0000428	LTQ-Orbitrap mass spectometer	MS:1000449	CID (collision induced dissociation)	In this study, we performed Chr 9-based data analysis to catalog Chr 9-encoded missing proteins and to identify Chr 9-based lung cancer-specific proteins, SNPs and mutations. To do so, we collected high quality mass spectrometry datasets using tandem mass spectral data that were acquired on a high resolution mass analyzer in the high-high mode with the HCD fragmentation method. Our bioinformatics…	C-HPP, missing proteins, lung cancer, biomaker	na	no	yes	no	no	no	no	no
PXD000651	25038066	In-depth Characterization of the Cerebrospinal Fluid (CSF) Proteome Displayed Through the CSF Proteome Resource (CSF-PR)	Human (Homo sapiens) [9606]	NCBITaxon:9606	CSF (cerebrospinal fluid), plasma	BTO:0000237,CL:0000786	na	na	na	trypsin	MS:1001251	2	10	0.7	10 ppm	0.7 Da	oxidation (methionine), deamidation (asparagine)	35#M,7#N	carbamidomethylation (cysteine)	4#C	na	na	LTQ Orbitrap Velos Pro mass spectrometer	MS:1001742	CID (collision induced dissociation)	Inthisstudy,thehumancerebrospinalfluid(CSF)proteome was mapped using three different strategies prior to Orbitrap LC-MS/MS analysis: SDS-PAGE and mixed mode reversed phase-anion exchange for mapping the global CSF proteome, and hydrazide-based glycopeptide capture for mapping glycopeptides. A maximal protein set of 3081 proteins (28,811 peptide sequences) was identified, of which 520 were identif…	blood brain barrier (BBB), post translational modification (PTM), SDS-PAGE, UNIPROT	this article has multiple projects ; CSF, gel separated, bound fraction	PXD000651,PXD000652,PXD000653,PXD000654,PXD000655,PXD000656,PXD000657	yes	no	no	no	no	no
PXD000653	25038066	In-depth Characterization of the Cerebrospinal Fluid (CSF) Proteome Displayed Through the CSF Proteome Resource (CSF-PR)	Human (Homo sapiens) [9606]	NCBITaxon:9606	CSF (cerebrospinal fluid), plasma	BTO:0000237,CL:0000786	na	na	na	trypsin	MS:1001251	2	10	0.7	10 ppm	0.7 Da	oxidation (methionine), deamidation (asparagine)	35#M,7#N	carbamidomethylation (cysteine)	4#C	na	na	LTQ Orbitrap Velos Pro mass spectrometer	MS:1001742	CID (collision induced dissociation)	Inthisstudy,thehumancerebrospinalfluid(CSF)proteome was mapped using three different strategies prior to Orbitrap LC-MS/MS analysis: SDS-PAGE and mixed mode reversed phase-anion exchange for mapping the global CSF proteome, and hydrazide-based glycopeptide capture for mapping glycopeptides. A maximal protein set of 3081 proteins (28,811 peptide sequences) was identified, of which 520 were identif…	blood brain barrier (BBB), post translational modification (PTM), SDS-PAGE, UNIPROT	this article has multiple projects ; CSF, glyco enriched, mixed-mode separated	PXD000651,PXD000652,PXD000653,PXD000654,PXD000655,PXD000656,PXD000657,PXD000657	yes	no	no	no	no	no
PXD000654	25038066	In-depth Characterization of the Cerebrospinal Fluid (CSF) Proteome Displayed Through the CSF Proteome Resource (CSF-PR)	Human (Homo sapiens) [9606]	NCBITaxon:9606	CSF (cerebrospinal fluid),	BTO:0000237	na	na	na	trypsin	MS:1001251	2	10	0.7	10 ppm	0.7 Da	oxidation (methionine), deamidation (asparagine)	35#M,7#N	carbamidomethylation (cysteine)	4#C	bottom-up	PRIDE:0000428	LTQ orbitrap Velos Pro mass spectrometer	MS:1001742	CID (collision induced dissociation)	In this study, the human cerebrospinal fluid (CSF) proteome was mapped using three different strategies prior to Orbitrap LC-MS/MS analysis: SDS-PAGE and mixed mode reversed phase-anion exchange for mapping the global CSF proteome, and hydrazide-based glycopeptide capture for mapping glycopeptides. A maximal protein set of 3081 proteins (28,811 peptide sequences) was identified, of which 520 were…	blood brain barrier (BBB), post translational modification (PTM), SDS-PAGE, UNIPROT	this article has multiple projects	PXD000651,PXD000652,PXD000653,PXD000654,PXD000655,PXD000656,PXD000657	yes	no	no	no	no	no
PXD000656	25038066	In-depth Characterization of the Cerebrospinal Fluid (CSF) Proteome Displayed Through the CSF Proteome Resource (CSF-PR)	Human(Homo sapiens)[9606]	NCBITaxon:9606	Cerebrospinal fluid (CSF)	BTO:0000237	na	na	na	trypsin	MS:1001251	2	10	0.7	10 ppm	0.7Da	oxidation (methionine),deamidation(asparagine)	35#M,7#N	carbamidomethylation (Cysteine)	4#C	na	na	LTQ Orbitrap Velos Pro mass spectrometer	MS:1001742	CID	In this study, the human cerebrospinal fluid (CSF) proteomewas mapped using three different strategies prior to OrbitrapLC-MS/MS analysis: SDS-PAGE and mixed mode reversedphase-anion exchange for mapping the global CSF proteome, and hydrazide-based glycopeptide capture for mapping glycopeptides.	X!Tandem CYCLONE,Plasma,enrichment	accessible viaProteomeXchange with identifier	PXD000651,PXD000652,PXD000653,PXD000654,PXD000655,PXD000656,PXD000657	yes	no	no	no	no	no
PXD000688	24699806	A Peptidomic Analysis of Human Milk Digestion in the Infant Stomach Reveals Protein-Specific Degradation Patterns	Human(Homo sapiens)[9606]	NCBITaxon:9606	Breast milk	BTO:0000149	na	na	na	na	na	na	20	0.04	20 ppm	40ppm	phosphorylations (serine,threonine, tyrosine),deamidation(glutamine ,asparagine),oxidation (methionine ,tryptophan)	21#S,21#T,21#Y,7#N,7#Q,35#M,35#W	na	na	na	na	Agilent nano-liquid chromatography Chip Cube 6520 Q-TOF MS/MS.	MS:1002791	na	This study combined nanospray LC separation with time-of-flight mass spectrometry, comprehensive structural libraries, and informatics to analyze milk from 3 human mothers and the gastric aspirates from their 4- to 12-d-old postpartum infants.	milk samples,X!Tandem,Mascot	analyzed via the downloadable version of X!Tandem ,no complete modification were required	no	yes	no	no	no	no	no
PXD000749	25406675	Anatomo-proteomic Characterization of Human Basal Ganglia: Focus on Striatum and Globus Pallidus	Human(Homo sapiens)[9606]	NCBITaxon:9606	Brain	BTO:0000142	na	na	na	Trypsin	MS:1001251	na	na	na	na	na	na	na	na	na	Shotgun Proteomics	PRIDE:0000429	Q-TRAP 5500 system with a nanoSpray III ion source	MS:1000931	na	Using this workflow, we have obtained a proteomic expression profile across striatum and globus pallidus structures among which 1681 proteins were located in caudate nucleus (CN), 1329 in putamen, 1419 in medial globus pallidus (GPi), and 1480 in lateral globus pallidus (GPe), establishing a BG reference proteome to a depth of 2979 unique proteins.	Basal ganglia, Striatum, Globus pallidus, Proteomics, Mass spectrometry, Bioinformatics	MULTIPLE PROJECT: PXD000742, PXD000749, PXD000755, PXD000757, Unmarked pdf.	PXD000742,PXD000749,PXD000755,PXD000757	yes	no	no	no	no	no
PXD000807	24748380	Quantitative Proteomic Analysis of Oral Brush Biopsies Identifies Secretory Leukocyte Protease Inhibitor as a Promising, Mechanism-Based Oral Cancer Biomarker	Human(Homo sapiens)[9606]	NCBITaxon:9606	MSK Leuk1 cells	na	BTO:0005241	iTRAQ	MS:1002622	trypsin	MS:1001251	2	625	0.8	1.6 amu	0.8amu	oxidation(methionine)	35#M	carbamidomethylation (Cysteine),iTRAQ(lysine ,N-terminal)	4#C,532#K,532#N-term	shotgun proteomics	PRIDE:0000429	LTQ-Orbitrap	MS:1000449	HCD	These results, combined with proteomics data indicating a decrease in SLPI in matched healthy control tissue from OSCC patients compared to tissue from healthy normaltissue, suggested a systemic decrease of SLPI in oral cells correlated with oral cancer development.	oral cancer,surface-enhanced laser desorption/ionization (SELDI)	na	no	yes	no	no	no	no	no
PXD000834	25381060	C-terminomics Screen for natural Substrates of Cytosolic Carboxypeptidase 1 Reveals Processing of Acidic Protein C termini*	Human(Homo sapiens)[9606]	NCBITaxon:9606	HEK293T	na	EFO:0001184	isotopic labelling	PRIDE:0000310	semi-ArgC/P	MS:1001303	0	10	0.5	10 ppm	0.5 Da	gln->pyroGlu, acetylation (N-terminal protein), D3-acetylation(N-terminal)	28#Q(N-term),1#N-term(Protein),56#N-term	D3-acetylation (lysine, N-terminal), oxidation (Methionine) or methionine-sulfoxide, butyrylation (12C4 or 13C4)( N terminal peptide)	56#K,56#N-term,35#M,35#M,1289#N-term	bottom-up	PRIDE:0000428	LTQ Orbitrap Velos	MS:1001742	na	CCPs are deglutamylating enzymes, able to catalyze the shortening of polyglutamate side-chains and the gene-encoded C termini of tubulin, telokin, and myosin light chain kinase. By means of C-terminal COFRADIC, a positional proteomics approach, we searched for cellular substrates targets of CCP1, the most relevant member of this family. We here identified seven new putative CCP1 protein substrate…	Immunoblot,mascot	na	no	yes	no	no	no	no	no
PXD000930	27694331	A Role for Human N-alpha Acetyltransferase 30 (naa30) in Maintaining Mitochondrial Integrity	Human (Homo sapiens) [9606]	NCBITaxon:9606	Human A-431 cells (epidermoid carcinoma cell line), HeLa cells (epithelial cervix adenocarcinoma), CAL-62 cells (anaplastic carcinoma)	na	CLO:0001591,CLO:0003684,BTO:0002146	SILAC (stable isotope labeling using amino acid in a cell culture)	MS:1002611	Endoproteinase semi-Arg-C/P	MS:1001303	0	10	0.5	10 ppm	0.5 Da	13C2D3-acetylation, Gln->pyroGlu(N-terminal ), acetylation (protein N-terminal)	28#Q(N-term),1#N-term(Protein)	13C2D3-acetylation (lysine),oxidation (methionine, methionine-sulfoxide), carbamidomethylation (cysteine)	35#M,35#M,4#C	na	na	LTQ Orbitrap XL mass spectrometer	MS:1000556	na	, we defined the in vivo human natC Nt-acetylome on a proteome-wide scale by combining knockdown of its catalytic subunit naa30 with positional proteomics. We identified 46 human natC substrates, expanding our current knowledge on the substrate repertoire of natC which now includes proteins harboring Met-Leu, Met-Ile, Met-Phe, Met-Trp, Met-Val, Met-Met, Met-His and Met-Lys N termini. Upon naa30 d…	apoptosis, reactive oxygen species (ROS), COFRADIC,	na	no	yes	no	no	no	no	no
PXD000963	26388710	Proteins fromformalin-fixed paraffin-embedded prostate cancer sections thatpredict the risk ofmetastatic disease	Human (Homo sapiens) [9606]	NCBITaxon:9606	prostate tissue	BTO:0001129	na	iTRAQ (isobaric tag for relative and absolute quantitation)	MS:1002622	trypsin	MS:1001251	1	50	0.2	50 ppm	0.2 Da	oxidation (methionine)	35#M	carbamidomethylation (cysteine)	4#C	bottom-up	PRIDE:0000428	MALDI TOF/TOF mass spectrometer	MS:1000652	na	Proteins extracted from formalin-fixed paraffin-embedded tissue were identified using nanoflow liquid chromatography-MALDI MS/MS or after separation by one- or two-dimensional electrophoresis. The proteomics data have been deposited to the ProteomeXchange with identifier PXD000963. A list of potential biomarker candidates, based on proposed associations with prostate cancer, was derived from the …	Formalin-fixed paraffin embedded, Prognostic biomarkers, Prostate cancer, Proteomics	na	no	yes	no	no	no	no	no
PXD001123	26279304	Oncoprotein ZNF322A Transcriptionally Deregulates Alpha-Adducin, Cyclin D1 and p53 to Promote Tumor Growth and Metastasis in Lung Cancer	Human(Homo sapiens)[9606]	NCBITaxon:9606	lung cells (A549, H460, H1299 and BEAS-2B,CL1-5)	na	CLO:0001601,CLO:0003601,CLO:0007986,CLO:0001925,CLO:0003248	iTRAQ	MS:1002622	trypsin	MS:1001303	2	300	0.2	0.3 Da	0.2	deamidation (asparagine,glutamine), oxidation (Methionine), iTRAQ4plex (lysine),iTRAQ4 plex (N-terminal),methylation(cysteine) .	7#N,7#Q,35#M,214#K,214#N-term,34#C	na	na	na	na	LC ESI Q TOF mass spectrometry	MS:1002791	na	we show ZNF322A protein overexpression in 123 Asian and 74 Caucasian lung cancer patients. Multivariate Cox regression analysisindicated that ZNF322A was an independent risk factor for a poor outcome in lung cancer, corroborating the Kaplan?Meier resultsthat patients with ZNF322A protein overexpression had significantly poorer overall survival than other patients	Mascot search engine, lung cancer, ZNF322A,lung tumorigenesis	na	no	yes	no	no	no	no	no
PXD001268	24954659	Maternal Serum Serpin B7 Is Associated With Early Spontaneous Preterm Birth	Human(Homo sapiens)[9606]	NCBITaxon:9606	endocervical (End1) cells, vaginal mucosal (Vk2) cells, endometrial carcinoma (ECC1) cells, and placental choriocarcinoma (BeWo) cells	na	CLO:0002928,CLO:0009535,EFO:1001512,CLO:0001935	SILAC	MS:1002611	trypsin	MS:1001303	2	1000	1	1Da	1Da	oxidation(methionine), carboxyamidomethlyation (cysteine), 13C6 15N2 (lysine), 13C6 15N1 (leucine)	35#M,4#C,259#K,268#L	na	na	shotgun proteomics	PRIDE:0000429	microflow reversed phase LC-electrospray ionization tandem mass spectrometry (LC-ESI/MS/MS) using a high resolution LTQ Orbitrap-XL instrument	MS:1000556	na	Targeted and shotgun serum proteomics analyses associated 1 protein, serpin B7, with early SPTB. Our results require validation in other cohorts and analysis of the possible mechanistic role of serpin B7 in parturition.	preterm birth; proteomics; serine proteinase inhibitors.	na	no	yes	no	no	no	no	no
PXD001353	25974414	Role of the Tau N-terminal Region in Microtubule Stabilization Revealed by New Endogenous Truncated Forms	Human(Homo sapiens)[9606]	NCBITaxon:9606	Brain cells	BTO:0000142	na	NHS-biotin	MOD:00470	semi-trypsin/semi-Asp-N peptides	MS:1001251	1	5	0.5	5 ppm	0.5 Da	carbamidomethylation (Cysteine), oxidation (Methionine), phosphorylation (Serine,Threonine), acetylation (N-terminal), thiopropionation (N-terminal, lysine)	4#C,35#M,21#S,21#T,1#N-term(Protein),58#N-term,58#K	na	na	na	na	Fourier transform ion cyclotron resonance (FT-ICR) mass spectrometer	MS:1000079	na	Our results show, interestingly, that the Gln124-Tau fragment displays astronger ability to bind and stabilize microtubules, suggesting that the Tau N-terminal domain could play adirect role in the regulation of microtubule stabilization. Future studies based on our new N-terminallytruncated-Tau species should improve our knowledge of the role of truncation in Tau biology as well as inthe AD path…	Alzheimer?s disease (AD),truncation,N-terminal,Mascot search engine,enrichment	na	no	yes	no	no	no	no	no
PXD001357	25429530	Direct Evidence of Milk Consumption From Ancient Human Dental Calculus	Human(Homo sapiens)[9606]	NCBITaxon:9606	Dental calculus	NCIT:C60715	na	na	na	semi-trypsin	MS:1001251	2	10	0.07	10 ppm	0.07Da	acetylation (N-terminal protein), deamination (Asparagine, glutamine), glu->pyroGlu, oxidation(methionine), hydroxylation(proline)	1#N-term(Protein),7#N,7#Q,27#E(N-term),35#M,35#P	carbamidomethylation (Cysteine)	4#C	shotgun proteomics	PRIDE:0000429	LTQ-Orbitrap VELOS mass spectrometer	MS:1001742	HCD	we identify individuals consuming cattle, sheep, and goat milk products in the archaeological record	milk,?-lactoglobulin,post-translational modifications	multiple project	PXD001359,PXD001360,PXD001361,andPXD001362	yes	no	no	no	no	no
PXD001362	25429530	Direct Evidence of Milk Consumption From Ancient Human Dental Calculus	Human (Homo sapiens) [9606]	NCBITaxon:9606	dental calculus	NCIT:C60715	na	na	na	trypsin	MS:1001251	2	10	0.07	10 ppm	0.07 Da	acetylation (protein N-terminal), deamidation (asparagine , glutamine), oxidation (methionine), hydroxylation (proline), Gln->pyroGlu	1#N-term(Protein),7#N,7#Q,35#M,35#P,28#Q	carbamidomethylation	4#C	shotgun proteomics	PRIDE:0000429	LTQ-Orbitrap VELOSmass spectrometer coupled to an Eksigent-nanoLC-Ultra 1D plus HPLC system	MS:1001742	HCD (higher energy collisional dissociation)	Here we report the first direct evidence of milk consumption, the whey protein b-lactoglobulin (BLG), preserved in human dental calculus from the Bronze Age (ca. 3000 BCE) to the present day. Using protein tandem mass spectrometry, we demonstrate that BLG is a species-specific biomarker of dairy consumption, and we identify individuals consuming cattle, sheep, and goat milk products in the archae…	human, dental calculus, dental plaque, Beta-lactoglobulin	this article has multiple projects	PXD001357,PXD001359,PXD001360,PXD001361,PXD001362.	yes	no	no	no	no	no
PXD001402	25271300	Proteome-metabolome Profiling of Ovarian Cancer Ascites Reveals Novel Components Involved in Intercellular Communication	Human(Homo sapiens)[9606]	NCBITaxon:9606	ovarian cancer cell line	na	EFO:0002394	na	na	trypsin	NCIT:C84232	1	20	0.04	20 ppm	0.04Da	oxidation (Methionine)	35#M	carbamidomethylation (Cysteine)	4#C	Bottom-up	PRIDE:0000428	TripleTOF 5600 mass spectrometer with a nanoSpray III ion source coupled with a nanoLC Ultra 2D nano-HPLC system	MS:1000932	na	The aim of this study was to elucidate specific features of the malignant ascites metabolome and proteome	Ovarian cancer,nanoSpray	Multiple project /mascot search engine settings	PXD001402,PXD001403	yes	no	no	no	no	no
PXD001425	26086942	Plasma Glycoproteomics Reveals Sepsis Outcomes Linked to Distinct Proteins in Common Pathways	Human (Homo sapiens) [9606]	NCBITaxon:9606	Blood	BTO:0000089	na	label free	MS:1002038	trypsin	MS:1001251	2	10	0.02	10 ppm	0.02Da	Deamination(asparagine), oxidation(methionine)	7#N,35#M	carbamidomethylation(cysteine)	4#C	glycoprotein enrichment	PRIDE:0000585	Q-Exactive	MS:1001911	HCD	Sepsis remains a predominant cause of mortality in the ICU, yet strategies to increase survival have proved largely unsuccessful. This study aimed to identify proteins linked to sepsis outcomes using a glycoproteomic approach to target extracellular proteins that trigger downstream pathways and direct patient outcomes.	blood coagulation factors, complement system proteins, computational biology, glycoproteins, proteomics, sepsis	na	no	yes	no	no	no	no	no
PXD001524	25505010	Derivation and Characterization of a Cytocompatible Scaffold From Human Testis	Human (Homo sapiens) [9606]	NCBITaxon:9606	human cadaveric testicular tissue	NCIT:C33758	na	na	na	trypsin	MS:1001251	na	10	0.02	10 ppm	0.02 Da	oxidation (methionine), deamidation (asparagine,glutamine)	35#M,7#Q,7#N	carbamidomethylation (cysteine)	4#C	bottom-up	PRIDE:0000428	Q Exactive mass spectrometry	MS:1001911	HCD (higher energy collisional dissociation)	Histological analysis showed that DTM could be obtained by mechanical agitation in 1% SDS for 24 h. The resulting DTM was found to be clear of cells while retaining the typical three-dimensional structure and the major components of the native tissue scaffold, including collagen type I and IV, fibronectin, laminin and glycosaminoglycans. In addition, using proteomic analysis, we revealed numerous…	decellularization, extracellular matrix, mass spectrometry, scaffold, testis	na	no	yes	no	no	no	no	no
PXD001674	28515092	Human CD62Ldim neutrophils identified as a separate subset byproteome profiling and in vivo pulse-chase labeling	Human(Homo sapiens)[9606]	NCBITaxon:9606	Blood (neutrophile)	BTO:0000089	na	pulse-chase labeling	OBI:0002132	trypsin	NCIT:C84232	2	50	0.05	50 ppm	0.05 da	oxidation(methionine)	35#M	carbamidomethylation (Cysteine)	4#C	Shotgun proteomics	PRIDE:0000429	LTQ orbitrap Q-Exactive	MS:1000449	HCD	In this study, we compared the in vivo kinetics and proteomes of banded, mature, and hypersegmented neutrophils to determine whether these cell types represent truly different neutrophil subsets or reflect changes induced by lipopolysaccharide (LPS) activation.	enrichment, hierarchical clustering	na	no	yes	no	no	no	no	no
PXD001838	25717101	Cellular STAT3 functions via PCBP2 to restrain Epstein-Barr Virus lytic activation in B lymphocytes	Human(Homo sapiens)[9606]	NCBITaxon:9606	EBV lymphoblastoid cell lines and HH514-16 cells	na	EFO:0005292,BTO:0000576	SILAC	MS:1002611	trypsin	NCIT:C84232	na	50	na	50 ppm	na	na	na	na	na	na	na	LTQ-Orbitrap XL	MS:1000556	na	The goals of the present study were 2-fold :(i)to determine the mechanism of STAT3-mediated resistance to lytic activation and (ii)to exploit our ?ndings to enhance susceptibility to lytic activation.	Epstein-Barr virus,Immunoblotting, Flow cytometry	na	no	yes	no	no	no	no	no
PXD002013	26026062	The Tec kinase-regulated phosphoproteome reveals a mechanism for the regulation of inhibitory signals in murine macrophages	Human(Homo sapiens)[9606]	NCBITaxon:9606	Bone marrow cells	na	CLO:0002092	TMT-6plex	PRIDE:0000314	trypsin	MS:1001251	na	na	na	na	na	na	na	na	na	na	na	na	na	na	we performed a detailed investigation of the role of Btk and Tec kinases in regulating TLR signalling in several types of primary murine macrophages.	toll-like receptor (TLR),Tec (Tyrosine kinase expressed in hepatocellular carcinoma),Phosphopeptide enrichment,	na	no	yes	no	no	no	no	no
PXD002014	28827734	Integrative epigenomics, transcriptomics and proteomics of patient chondrocytes reveal genes and pathways involved in osteoarthritis	Human (Homo sapiens)[9606]	NCBITaxon:9606	Chondrocytes, Hip, Knee	NCIT:C12557,BTO:0003595,BTO:0001457	na	label free	MS:1002038	na	na	na	30	0.2	30 ppm	0.2Da	Oxidation (Meothenine), Deamidation (Asparagine, Glutamine)	35#M,7#N,7#Q	TMT6plex (N-terminal, lysine), Carbamidomethylation (cysteine)	737#N-term,737#K,4#C	na	na	Dionex Ultimate 3000 UHPLC system coupled with the high resolution LTQ Orbitrap Velos mass spectrometer	MS:1000449	HCD	In this study, we identified consistent molecular players in OA progression that replicated across independent datasets and that have translational potential.	Human, Chondrocytes, TMT, Osteoarthritis, Label Free	na	no	yes	no	no	no	no	no
PXD002041	26110064	Proteomic Analysis of Colon and Rectal Carcinoma Using Standard and Customized Databases	Human (Homo sapiens) [9606]	NCBITaxon:9606	rectal cancer cell,colon cancer cell	na	BTO:0000193,BTO:0000797	na	na	trypsin	MS:1001251	na	10	0.5	10 ppm	0.5 Da	oxidation (methionine), acetylation (proteinN-terminal)	35#M,1#N-term(Protein)	carbamidomethylation (cysteine)	4#C	shotgun proteomics	PRIDE:0000429	Thermo LTQ Orbitrap Velos instrument	MS:1001742	na	Understanding proteomic differences underlying the different phenotypic classes of colon and rectal carcinoma is important and may eventually lead to a better assessment of clinical behavior of these cancers. We here present a comprehensive description of the proteomic data obtained from 90 colon and rectal carcinomas previously subjected to genomic analysis by The Cancer Genome Atlas (TCGA). Her…	Homo sapiens , colorectum , colon , breast	this article has multiple projects ; Pepitome and MyriMatch	PXD001006,PXD002041,PXD002042,PXD002043,PXD002044,PXD002045,PXD002046,PXD002047,PXD002048,PXD002049,PXD002050,PXD001991	yes	no	no	no	no	no
PXD002046	26110064	Proteomic Analysis of Colon and Rectal Carcinoma Using Standard and Customized Databases	Human (Homo sapiens) [9606]	NCBITaxon:9606	rectal cancer cell,colon cancer cell	na	BTO:0000193,BTO:0000797	na	na	trypsin	MS:1001251	na	20	0.5	20 ppm	0.5 Da	oxidation (methionine), acetylation (proteinN-terminal)	35#M,1#N-term(Protein)	carbamidomethylation (cysteine)	4#C	shotgun proteomics	PRIDE:0000429	Thermo LTQ Orbitrap Velos instrument	MS:1001742	na	Understanding proteomic differences underlying the different phenotypic classes of colon and rectal carcinoma is important and may eventually lead to a better assessment of clinical behavior of these cancers. We here present a comprehensive description of the proteomic data obtained from 90 colon and rectal carcinomas previously subjected to genomic analysis by The Cancer Genome Atlas (TCGA). Her…	Homo sapiens , colorectum , colon , breast	this article has multiple projects ; Pepitome and MyriMatch	PXD001006,PXD002041,PXD002042,PXD002043,PXD002044,PXD002045,PXD002046,PXD002047,PXD002048,PXD002049,PXD002050,PXD001991	yes	no	no	no	no	no
PXD002050	26110064	Proteomic Analysis of Colon and Rectal Carcinoma Using Standard and Customized Databases	Human(Homo sapiens)[9606]	NCBITaxon:9606	rectal cancer cell,colon cancer cell	BTO:0000193,BTO:0000586	na	na	na	trypsin	NCIT:C84232	na	10	0.5	10 ppm	0.5Da	oxidation(methionine),acetylation(N-terminal protein)	35#M,1#N-term(Protein)	carbamidomethylation (Cysteine)	4#C	na	na	Thermo LTQ Orbitrap Velos ion trap	MS:1001742	na	We discuss new challenges in processing these large proteomic datasets for relevant proteins and protein variants.	pepetome,myrimatch,MSGF+	MS-GF+ search setting is been used	no	yes	no	no	no	no	no
PXD002080	25043054	Proteogenomic Characterization of Human Colon and Rectal Cancer	Human (Homo sapiens) [9606]	NCBITaxon:9606	colorectal cells (CRC)	na	BTO:0001615	na	na	na	na	na	na	na	na	na	na	na	na	na	shotgun proteomics	PRIDE:0000429	Thermo Orbitrap-Velos MS instrument	MS:1001742	na	We analyzed proteomes of colon and rectal tumors previously characterized by the Cancer Genome Atlas (TCGA) and performed integrated proteogenomic analyses. Somatic variants displayed reduced protein abundance compared to germline variants. mRna transcript abundance did not reliably predict protein abundance differences between tumors. Proteomics identified five proteomic subtypes in the TCGA coh…	Proteogenomic, human colon, rectal cancer	CPTAC project ; This article has multiple projects	PXD002080,PXD002081,PXD002082,PXD002083,PXD002084,PXD002085,PXD002086,PXD002087,PXD002088,PXD002089	yes	no	no	no	yes	no
PXD002086	25043054	Proteogenomic Characterization of Human Colon and Rectal Cancer	Human (Homo sapiens) [9606]	NCBITaxon:9606	colorectal cancer (CRC) cells	na	BTO:0001615	isotope labeling	PRIDE:0000310	trypsin	MS:1001251	na	na	na	na	na	oxidation (methionine)	35#M	carbamidomethylation (cysteine)	4#C	bottom-up	PRIDE:0000428	Thermo Orbitrap Velos	MS:1002835	na	We analyzed proteomes of colon and rectal tumors previously characterized by the Cancer Genome Atlas (TCGA) and performed integrated proteogenomic analyses. Somatic variants displayed reduced protein abundance compared to germline variants. mRna transcript abundance did not reliably predict protein abundance differences between tumors. Proteomics identified five proteomic subtypes in the TCGA coh…	colorectal cancer (CRC) , COSMIC database, colon and rectal tumor	this article has multiple projects: PXD002080, PXD002081, PXD002082, PXD002083, PXD002084, PXD002085, PXD002086, PXD002087, PXD002088, PXD002089 ; this is a cptech project	no	yes	no	no	no	na	no
PXD002097	27307780	Phosphotyrosine profiling ofcurcumin-induced signaling	Human (Homo sapiens)[9606]	NCBITaxon:9606	CAL 27 cells	na	na	SILAC	MS:1002611	Trypsin	MS:1001251	1	5	25	5 ppm	0.025 da	Oxidation (methionine), Phosphorylation (serine, threonine, tyrosine), SILAC labeling ((13C6) (lysine and arginine))	35#M,21#S,21#T,21#Y,188#K,188#R	Carbamidomethylation (cysteine)	4#C	na	na	Orbitrap Fusion Tribrid mass spectrometer	MS:1002416	HCD	The study indicates that curcumin may regulate cellular processes such as proliferation and migration through perturbation of the focal adhesion kinase pathway.	Oral cancer, Phosphoproteomics, In vivo labeling, Curcumin, Immunoaffinity purification	na	no	yes	no	no	no	no	no
PXD002132	27796319	A dual specificity kinase, DYRK1A, as a potential therapeutic target for head and neck squamous cell carcinoma	Human(Homo sapiens)[9606]	NCBITaxon:9606	head and neck squamous cell carcinoma (HNSCC) cell lines, keratinocyte cell line OKF6/TERT1	na	EFO:0000181,BTO:0000375	TMT labeling	PRIDE:0000314	Trypsin	MS:1001251	2	10	0.05	10 ppm	0.05 Da	Oxidation (methionine), Phosphorylation (Tyrosine, Serine, Threonine)	35#M,21#Y,21#S,21#T	Carbamidomethylation(cysteine), TMT modification (peptide N-terminal, lysine)	4#C,739#N-term,739#K	Phosphopeptide enrichment	PRIDE:0000587	LTQ-Orbitrap Velos mass spectrometer	MS:1000449	HCD	we compared the phosphotyrosine profiles of a panel of HNSCC cell lines to a normal oral keratinocyte cell line. our results suggest that DYRK1A could be a novel therapeutic target in HNSCC.	DYRK1A, phospho-enrichment	na	no	yes	no	no	no	no	no
PXD002163	26272980	Proteomic Profiling of Detergent Resistant Membranes (Lipid Rafts) of Prostasomes	Human (Homo sapiens) [9606]	NCBITaxon:9606	seminal plasma	BTO:0001232	na	na	na	trypsin	MS:1001251	1	10	0.4	10 ppm	0.4 Da	oxidation	35#M	carbamidomethylation	4#C	shotgun proteomics	PRIDE:0000429	na	na	CID (collision induced dissociation)	Prostasomes are exosomes derived from prostate epithelial cells through exocytosis by multivesicular bodies. Prostasomes have a bilayered membrane and readily interact with sperm. The membrane lipid composition is unusual with a high contribution of sphingomyelin at the expense of phosphatidylcholine and saturated and monounsaturated fatty acids are dominant. Lipid rafts are liquid-ordered domain…	prostasomes, lipid rafts, caveolae, MudPIT (multidimensional protein identification technology)	na	no	yes	no	no	no	no	no
PXD002339	26474164	In-Depth, Label-Free Analysis of theErythrocyte Cytoplasmic Proteome inDiamond Blackfan Anemia Identifies aUnique Inflammatory Signature	Human (Homo sapiens) [9606]	NCBITaxon:9606	Red blood cells	na	EFO:0000296	label free quantitation	MS:1002038	trypsin	MS:1001251	2	20	0.5	20 ppm	0.5Da	oxidation(methionine),acetylation(N-terminal)	35#M,1#N-term(Protein)	carbamidomethylation(cysteine)	4#C	cytosolic protein enrichment	PRIDE:0000585	LTQ orbitrap XL mass spectrometer	MS:1000556	na	Diamond Blackfan Anemia (DBA) is a rare, congenital erythrocyte aplasia that is usuallycaused by haploinsufficiency of ribosomal proteins due to diverse mutations in one of sev?eral ribosomal genes. A striking feature of this disease is that a range of different mutationsin ribosomal proteins results in similar disease phenotypes primarily characterized by eryth?rocyte abnormalities and macrocyti…	Human, erythrocyte, LC-MS/MS	na	no	yes	no	no	no	no	no
PXD002421	27666543	The lncRna Landscape of Breast Cancer Reveals a Role for DSCAM-AS1 in Breast Cancer Progression	Human(Homo sapiens)[9606]	NCBITaxon:9606	DSCAM-AS1,T47D cell,ZR75-1 cell,HEK293 cell,MCF7 cell	na	OGG:3100506492,EFO:0001247,EFO:0001262,CLO:0001230,CLO:0007606	na	na	trypsin	MS:1001251	2	1000	0.5	1Da	0.5Da	acetylation(N-terminal protein),Oxidation (methionine),Gln->pyroGlu (N-terminal)	1#N-term(Protein),35#M,28#Q(N-term)	Carbamidomethylation (Cysteine)	4#C	na	na	Velos Pro mass spectrometer	MS:1000855	na	We demonstrate that DSCAM-AS1 mediates tumour progression and tamoxifenresistance and identify hnRNPL as an interacting protein involved in the mechanism ofDSCAM-AS1 action.	breast cancer,DSCAM-AS1,	na	no	yes	no	no	no	no	no
PXD002437	27155584	Proteome Profiling in Lung Injury Following Hematopoietic Stem Cell Transplantation	Human(Homo sapiens)[9606]	NCBITaxon:9606	Bronchoalveolar lavage fluid (BALF)	BTO:0000155	na	iTRAQ	PRIDE:0000313	Trypsin-gold	na	na	na	na	na	na	na	na	na	na	na	na	Orbitrap Velos mass spectrometer	MS:1001742	HCD	Our objective was to characterize the global bronchoalveolar lavage fluid (BALF) protein expression of IPS to identify proteins and pathways that differentiate IPS from infectious lung injury following HSCT.	IPS, BAL, Proteomics, Bioinformatics, Pathway	na	no	yes	no	no	no	no	no
PXD002620	26442468	A Proteomic Glimpse Into Human Ureter Proteome	Human(Homo sapiens)[9606]	NCBITaxon:9606	ureter sample	na	BTO:0001409	na	na	trypsin	MS:1001303	na	5	na	5 ppm	na	oxidation(Methionine,histidine,tryptophan)	35#M,35#H,35#W	Carbamidomethylation (Cysteine)	4#C	na	na	Thermo Q-Exactive	MS:1001911	na	we compared ureter proteome with a comprehensive mass spectrometric urinary database, exosomal urinary database, and kidney database.	Biomarker; Cell biology; Dataset; OFFGel fractionation; Ureter; Urine,ProluCID search engine	na	no	yes	no	no	no	no	no
PXD002633	26483418	Rosuvastatin Alters the Proteome of High Density Lipoproteins: Generation of alpha-1-antitrypsin Enriched Particles With Anti-inflammatory Properties	Human(Homo sapiens)[9606]	NCBITaxon:9606	blood	BTO:0000089	na	na	na	trypsin	MS:1001251	2	20	0.80	20 ppm	0.80Da	oxidation (Methionine),deamidation (Asparagine, Glutamine)	35#M,7#N,7#Q	carbamidomethylation (Cysteine)	4#C	na	na	Thermo Orbitrap Velos	MS:1001910	na	we show that statins cansignificantly alter the protein composition of both LDL andHDL and our studies reveal a novel functional relationshipbetween A1AT and HDL.	Rosuvastatin, Lipoproteins	na	no	yes	no	no	no	no	no
PXD002672	28785034	Bronchoalveolar Lavage Fluid Protein Expression in Acute Respiratory Distress Syndrome Provides Insights into Pathways Activated in Subjects with Different Outcomes	Human (Homo sapiens)[9606]	NCBITaxon:9606	Bronchoalveolar lavage fluid (BALF)	BTO:0000155	na	iTRAQ	PRIDE:0000313	na	na	na	na	na	na	na	na	na	na	na	Shotgun Proteomics	PRIDE:0000429	LTQ Orbitrap Velos	MS:1000449	HCD	This study represents a critical first step in our effort to identify proteomic molecular endotypes in ARDS and identify potential signaling pathway targets to reduce ARDS-related mortality.	SWATH-MS	na	no	yes	no	no	no	no	no
PXD002725	30116025	Proteomic phenotyping of metastatic melanoma reveals putative signatures of MEK inhibitor response and prognosis	Human(Homo sapiens)[9606]	NCBITaxon:9606	Stage III early passage melanoma cell lines C002, C037, C045, C052, C054, C078, C084, and C096	na	BTO:0000849	na	na	na	na	na	na	na	na	na	na	na	Carbamidomethylation (Cysteine)	4#C	na	na	QTRAP 5500 (SCIEX) with nanoAcquity UPLC system.	MS:1000931	na	These results demonstrate the utility of proteomic phenotyping to identify both putative biomarkers of response to MEK inhibition and prognostication associated with metastatic melanoma. These results demonstrate the utility of proteomic phenotyping to identify both putative biomarkers of response to MEK inhibition and prognostication associated with metastatic melanoma.	SWATH mass spectrometry, Melanoma cell lines	The mass spectrometry proteomics data have been deposited to the ProteomeXchange Consortium25 via the PRIDE partner repository with the dataset identi?er PXD002725 for in-vitro study and PXD007083 for Human(Homo sapiens)[9606] tissue specimen study.	PXD002725,PXD007083	yes	no	no	no	no	no
PXD002736	29038488	MCM2-regulated functional networks in lung cancer by multidimensional proteomic approach.	Human(Homo sapiens)[9606]	NCBITaxon:9606	Lung epithelial cells A549, lung cancer cell HCI-H1299	na	CLO:0001601,CLO:0007986	iTRAQ	PRIDE:0000313	trypsin	MS:1001251	2	10	0.02	10 ppm	20ppm	Oxidation, Phosporylation	na	Carbamidomethylation	4#C	Phosphopeptide enrichment	PRIDE:0000587	nanoAcquity system connected to LTQ-Orbitrap XL hybrid mass spectrometer	MS:1000449	HCD	This study enhances our capacity to therapeutically target cancer-specific phosphoproteins.	na	search parameters was performed using Andromeda Search engine against Swiss-Prot human database,multple project(PXD002736, PXD003743)	yes	yes	no	no	no	no	no
PXD002781	27084891	Hepatic Cytochrome P450 Activity, Abundance, and Expression Throughout Human Development	Human(Homo sapiens)[9606]	NCBITaxon:9606	Liver tissue	BTO:0000759	na	na	na	na	na	na	na	na	na	na	na	na	na	na	na	na	na	na	na	In an effort to develop a more comprehensive understanding of the ontogeny of P450 enzymes, we employed a multi-omic characterization of P450 transcript expression, protein abundance, and functional activity	pharmacokinetic,ontogeny	na	no	yes	no	no	no	no	no
PXD003014	27037360	Proteomic Analysis Reveals a Novel Mutator S (MutS) Partner Involved in Mismatch Repair Pathway	Human(Homo sapiens)[9606]	NCBITaxon:9606	HEK293T	na	EFO:0001184	na	na	trypsin	NCIT:C84232	2	50	1	50 ppm	1Da	oxidation (methionine)	35#M	carbamidomethylation (Cysteine)	4#C	TAP-MS	MI:0676	Orbitrap Elite MS	MS:1001910	na	we conducted a proteomic analysis and identified MMR-associated protein complexes using tandem-affinity purification coupled with mass spectrometry (TAP-MS) method	Protein?Protein Interaction	na	no	yes	no	no	no	no	no
PXD003037	26854219	Systemic reprograming of translation efficiencies on oxygen stimulus	Human (Homo sapiens) [9606]	NCBITaxon:9606	U87MG human glioblastoma and 786-O human renal clear cell carcinoma cell lines, MCF7 human breast cancer and PC3 human prostate cancer cell lines	na	CLO:0009464,CLO:0001486,CLO:0007606,CLO:0008395	SILAC	MS:1002611	na	na	na	10	0.6	10.0 ppm	0.6 Da	deamidation (asparagine, glutamine), 13C615N2 (lysine), 13C615N4 (arginine), oxidation (methionine)	35#M,259#K,267#R,7#N,7#Q	na	na	na	na	linear ion trap-Orbitrap hybrid analyzer outfitted with a nanospray source and EASY-nLC split-free nano-LC system , LTQ-Orbitrap XL hybrid ion trap mass spectrometer	MS: 1000291,MS:1000556	na	This report examines the contributions of mRna abundance and translation efficiency to protein output in cells responding to oxygen stimulus. We show that changes in translation efficiencies, not mRna levels, represent the major mechanism governing cellular responses to [O2] perturbations. Two distinct cap-dependent protein synthesis machineries select mRnas for translation: the normoxic eIF4F an…	Oxygen, hypoxia, cancer, translation, Rna sequencing, SILAC, eIF4E, eIF4E2, eIF4F, HIF	some information is taken from the supplementary as well	no	yes	no	no	no	no	no
PXD003120	26588988	Down-regulation of LATSkinases alters p53 to promotecell migration	Human (Homo sapiens) [9606]	NCBITaxon:9606	H1299 cells , HBEC3-KT , HCC1143 cells	na	CLO:0007986,,CLO:0003630	label free	MS:1002038	na	na	na	na	na	na	na	na	na	na	na	na	na	Q-Exactive Plus MS	MS:1002634	na	In this article, p53 is a pivotal tumor suppressor and a major barrieragainst cancer. We now report that silencing of the Hippopathway tumor suppressors LATS1 and LATS2 in non?transformed mammary epithelial cells reduces p53 phos?phorylation and increases its association with the p52NF-?B subunit. Moreover, it partly shifts p53?s conforma?tion and transcriptional output toward a state resemblingc…	PTMs, TP53,cancer	na	no	yes	no	no	no	no	no
PXD003200	26742488	Implementation of Meiosis Prophase I Programme Requires a Conserved Retinoid-Independent Stabilizer of Meiotic Transcripts	Human (Homo sapiens) [9606], Mouse (mus musculus) [10090]	NCBITaxon:9606,NCBITaxon:10090	Human epithelial kidney cells (HEK-293)	na	CLO:0001230	spectral counts	NCIT:C161818	trypsin	MS:1001251	na	na	na	na	na	na	na	na	na	na	na	LTQ-Orbitrap XL	MS:1000556	na	Here we demonstrate that fertility and the implementation of the meiotic programme require a previously uncharacterized meiosis-speci?c protein, MEIOC. Meioc invalidation in mice induces early and pleiotropic meiotic defects in males and females. MEIOC prevents meiotic transcript degradation and interacts with an Rna helicase that binds numerous meiotic mRnas. Our results indicate that proper eng…	meiosis prophase I , retinoid-independent stabilizer , meiotic transcripts , MEIOC	this article has multiple projects	PXD003199,PXD003200	yes	no	no	no	no	no
PXD003210	27976729	Interactomic analysis of REST/ NRSF and implications of its functional links with the transcription suppressor TRIM28 during neuronal differentiation	Mouse (Mus Musculus)[10090],Human (Homo sapiens)[9606]	NCBITaxon:9606,NCBITaxon:10090	HEK293FT (Invitrogen), SH-SY5Y (Sigma) and CAD (Sigma) cells, Mouse embryonic cortical neurons	na	BTO:0005029,CLO:0009015,BTO:0005820	label free	MS:1002038	Trypsin	MS:1001251	2	10	0.8	10 ppm	0.8Da	Oxidation (methionine), Carbamidomethylation (cysteine)	35#M,4#C	na	na	AP-MS	PRIDE:0000431	LTQ Velos Orbitrap mass spectrometer	MS:1000449	CID	Our study of REST reveals novel interacting proteins which could be a valuable resource for investigating unidentified functions of REST and also suggested functional links between REST and TRIM28 during neuronal development	Interaction profiling, Proteomics, Cell biology, LC-MS/MS, Transcription factor	na	no	yes	no	no	no	no	no
PXD003218	29308009	Discovery and Longitudinal Evaluation of Candidate Biomarkers for Ischaemic Stroke by Mass Spectrometry-Based Proteomics	Human (Homo sapiens) [9606]	NCBITaxon:9606	Blood	BTO:0000089	na	label free	MS:1002038	trypsin	MS:1001251	2	5	0.5	5 ppm	0.5Da	oxidation(methionine),acetylation(N-terminal)	35#M,1#N-term	carbamidomethylation(cysteine)	4#C	na	na	orbitrap Elite	MS:1001910	CID (collision induced dissociation)	In this article, To investigate changes in blood proteins after stroke and as a result of thrombolysis treatment we performed label-free quantitative proteomics on serum samples using high-resolution mass spectrometry and long high-performance liquid chromatography gradient (5 hours) combined with a 50-cm column to optimise the peptide separation. We identified (false discovery rate [FDR]: 1%) an…	Stroke, biomarker, protein expression, mass spectrometry	na	no	yes	no	no	no	no	no
PXD003293	27461979	Integrative proteomic analysis reveals reprograming tumor necrosis factor signaling in epithelial mesenchymal transition	Human(Homo sapiens)[9606]	NCBITaxon:9606	Human small airway epithelial cell line ( hSAECs)	na	EFO:0005728	iTRAQ stable isotope labeling	PRIDE:0000313	Trypsin	MS:1001251	2	20	0.02	20 ppm	20ppm	Oxidation (methionine), Phosphorylation (serine, threonine or tyrosine)	35#M,21#S,21#T,21#Y	na	na	na	na	Q Exactive Orbitrap mass spectrometer	MS:1001911	HCD	In this study, we extend this previous Rna-Seq study to systematically quantify proteome-wide changes in protein abundance and phosphorylation of primary hSAECs in response to TGF?-induced EMT and in a response to TNF? stimulation in the absence or presence of EMT.	epithelial mesenchymal transition; Proteomics; Phosphoproteomics; Mass spectrometry; Innate immune response	na	PXD003293,PXD003294,PXD003295,PXD003323,PXD003296,PXD003297,PDX003974	yes	no	no	no	no	no
PXD003296	27461979	Integrative proteomic analysis reveals reprograming tumor necrosis factor signaling in epithelial mesenchymal transition	Human(Homo sapiens)[9606]	NCBITaxon:9606	primary human small airway epithelial cell line (hSAECs)	na	na	iTRAQ labeling	PRIDE:0000313	Trypsin	MS:1001251	2	20	0.02	20 ppm	20 ppm	Oxidation (methionine), Phosphorylation (serine, threonine, tyrosine )	35#M,21#S,21#T,21#Y	Carbamidometheylation (cysteine), 8-plex iTRAQ labeling (lysine, peptide N-terminal)	4#C,730#K,730#N-term	Phosphopeptide Enrichment	PRIDE:0000587	Q Exactive Orbitrap mass spectrometer	MS:1001911	HCD	This study shows that cellular response to TNF? is cell state dependent and the relative TNF? response in mesenchymal state is highly compressed.	False discovery rate (FDR),epithelial mesenchymal transition; Proteomics; Phosphoproteomics; Mass spectrometry; Innate immune response	multiple project: PXD003293, PXD003294, PXD003295, PXD003323, PXD003296, PXD003297, PDX003974	PXD003293,PXD003294,PXD003295,PXD003323,PXD003296,PXD003297,PDX003974	yes	no	no	no	no	no
PXD003297	27461979	Integrative proteomic analysis reveals reprograming tumor necrosis factor signaling in epithelial mesenchymal transition	Human(Homo sapiens)[9606]	NCBITaxon:9606	Primary human small airway epithelial cell line (hSAECs)	na	EFO:0005728	iTRAQ labeling	PRIDE:0000313	Trypsin	MS:1001251	2	20	0.02	20 ppm	20 ppm	Oxidation (methionine), Phosphorylation (serine, threonine, tyrosine )	35#M,21#S,21#T,21#Y	Carbamidometheylation (cysteine), 8-plex iTRAQ labeling (lysine, peptide N-terminal)	4#C,730#K,730#N-term	Phosphopeptide Enrichment	PRIDE:0000587	Q Exactive Orbitrap mass spectrometer	MS:1001911	HCD	This study shows that cellular response to TNF? is cell state dependent and the relative TNF? response in mesenchymal state is highly compressed.	False discovery rate (FDR),epithelial mesenchymal transition; Proteomics; Phosphoproteomics; Mass spectrometry; Innate immune response	multiple project: PXD003293, PXD003294, PXD003295, PXD003323, PXD003296, PXD003297, PDX003974	PXD003293,PXD003294,PXD003295,PXD003323,PXD003296,PXD003297,PDX003974	yes	no	no	no	no	no
PXD003323	27461979	Integrative proteomic analysis reveals reprograming tumor necrosis factor signaling in epithelial mesenchymal transition	Human (Homo sapiens) [9606]	NCBITaxon:9606	human small airway epithelial cells(hSAECs)	na	CLO:0037338	iTRAQ	MS:1002622	lys-c,trypsin	MS:1001310,MS:1001251	2	20	na	20 ppm	na	oxidation(methionine), phosphorylation(serine,threonine,tyrosine)	35#M,21#S,21#T,21#Y	carbamidomethylation(cysteine), 8-plex ITRAQ (lysine peptide N-terminal)	4#C,730#K,730#N-term	phosphoproteomics enrichment	PRIDE:0000587	Q-Exactive orbitrap mass spectrometer	MS:1001911	HCD	In this article, we applied quantitative proteomics and phosphoprotein profiling to understand the molecular mechanism of EMT and the impact of EMT on innate inflammatory responses. We quantified 7,925 proteins and 1,348 phosphorylation sites by stable isotope labeling with iTRAQ technology. We found that cellular response to TNF? is cell state dependent and the relative TNF? response in mesenchy…	epithelial mesenchymal transition, Proteomics, Phosphoproteomics, Mass spectrometry, Innate immune response	this article has multiple projects	PXD003293,PXD003294,PXD003295,PXD003323,PXD003296,PXD003297,andPDX003974.	yes	no	no	no	no	no
PXD003340	27895531	Follicular fluid biomarkers for human invitro fertilization outcome: Proof ofprinciple	Human(Homo sapiens)[9606]	NCBITaxon:9606	follicular fluid	BTO:0004383	na	na	na	trypsin	MS:1001251	0	10	0.02	10 ppm	20mmu	oxidation (methionine)	35#M	carbamidomethylation	4#C	bottom-up	PRIDE:0000428	hybrid quadrupole orbitrap mass spectrometer	MS:1002877	na	The MS-based comprehensive peptidomic approach carried out in this study, established anovel panel of potential biomarkers that present a promising predictive accuracy rate in fertilization outcome,and indicates FF as an interesting biomarker resource to improve IVF clinic routine.	Peptide, Biomarker, Oocyte quality, Follicular fluid	na	no	yes	no	no	no	no	no
PXD003362	27727249	microRna-140 Inhibits Inflammation and Stimulates Chondrogenesis in a Model of Interleukin 1?-induced Osteoarthritis	Human (Homo sapiens) [9606]	NCBITaxon:9606	mesenchymal stem cells , synovial fibroblasts (SF)	BTO:0001336	CL:0000134	label free quantification	MS:1002038	trypsin	MS:1001251	2	20	6	20 ppm	6 ppm	oxidation (methionine),acetylation(protein N-terminal), Glu->pyroGlu , Gln->pyroGlu	35#M,1#N-term(Protein),27#E,28#Q	na	na	na	na	Easy nLC1000 nano-LC system connected to a quadrupole? Orbitrap (QExactive) mass spectrometer	MS:1001911	HCD (higher energy collisional dissociation)	In this study we investigated the role of miR-140-5p (here?after referred to as miR-140) using an in vitro model of OA. Human articular chondrocytes (ACs) derived from OA carti?lage overexpressing miR-140 were cultured in pathophysi?ologically relevant concentrations of recombinant human IL1B (rhIL1B) and analyzed using real-time quantitative polymerase chain reaction (RT-qPCR), western blot and …	NFKB	na	no	yes	no	no	no	no	no
PXD003408	27025457	Contribution of Human Fibroblasts and Endothelial Cells to the Hallmarks of Inflammation as Determined by Proteome Profiling	Human (Homo sapiens) [9606]	NCBITaxon:9606	Primary HUVEC , Normal human dermal fibroblasts (NHDF)	na	EFO:0002451,BTO:0003185	label free quantification (LFQ)	MS:1002038	trypsin	MS:1001251	2	25	0.02	25 ppm	20 ppm	oxidation (methionine), acetylation (protein N-terminal)	35#M,1#N-term(Protein)	carbamidomethylation (cysteine)	4#C	shotgun proteomics	PRIDE:0000429	QExactive orbitrap mass spectrometer	MS:1001911	HCD (higher energy collisional dissociation)	. Cells were stimulated with interleukin 1 and fractionated in order to obtain secreted, cytoplasmic and nuclear protein fractions. Proteins were submitted to a data-dependent bottom up analyticalplatformusingaQExactiveorbitrapandtheMaxQuant software for protein identification and label-free quantification.Resultswerefurthercombinedwithsimilarly generated data previously obtained from the analysi…	human fibroblast, proteome profiling, secretome analysis, Max-Quant software	this article has multiple projects: PXD003406 - PXD003417	PXD003406,PXD003407,PXD003408,PXD003409,PXD003410,PXD003411,PXD003412,PXD003413,PXD003414,PXD003415,PXD003416,PXD003417	yes	no	no	no	no	no
PXD003409	27025457	Contribution of Human Fibroblasts and Endothelial Cells to the Hallmarks of Inflammation as Determined by Proteome Profiling	Human(Homo sapiens)[9606]	NCBITaxon:9606	HUVEC(Human umbilical vein endothelial cells)	na	EFO:0002451	na	na	trypsin	NCIT:C84232	2	25	0.02	25 ppm	20ppm	oxidation (methionine), acetylation(N-terminal protein)	35#M,1#N-term(Protein)	carbamidomethylation (Cysteine)	4#C	bottom-up	PRIDE:0000428	QExactive orbitrap mass spectrometer,equipped with a nanospray ion source (Thermo Fisher Scientific),coupled to the nano HPLC system	MS:1001911	na	a comprehensive proteome study of inflammatory activated primary human endothelial cells and fibroblasts. Comparative proteome analysis determine common and cell type-specific inflammation signatures comprising novel candidate marker molecules and related expression patterns of transcription factors.	B- and T lymphocytes,MaxQuant,NHDF(Normal Human Dermal Fibroblasts)	accessible viaProteomeXchange with identifier PXD003406 to PXD003417	PXD003406,PXD003407,PXD003408,PXD003409,PXD003410,PXD003411,PXD004312,PXD003413,PXD003414,PXD003415,PXD003416,PXD003417	yes	no	no	no	no	no
PXD003411	27025457	Contribution of Human Fibroblasts and Endothelial Cells to the Hallmarks of Inflammation as Determined by Proteome Profiling	Human(Homo sapiens)[9606]	NCBITaxon:9606	HUVEC(Human umbilical vein endothelial cells)	na	EFO:0002451	na	na	trypsin	NCIT:C84232	2	25	0.02	25 ppm	20ppm	oxidation (methionine),acetylation(N-terminal protein)	35#M,1#N-term(Protein)	carbamidomethylation (Cysteine)	4#C	bottom-up	PRIDE:0000428	QExactive orbitrap mass spectrometer,equipped with a nanospray ion source (Thermo Fisher Scientific),coupled to the nano HPLC system	MS:1001911	na	a comprehensive proteome study of inflammatory activated primary human endothelial cells and fibroblasts. Comparative proteome analysis determine common and cell type-specific inflammation signatures comprising novel candidate marker molecules and related expression patterns of transcription factors.	B- and T lymphocytes,MaxQuant,NHDF(Normal Human Dermal Fibroblasts)	accessible viaProteomeXchange with identifier PXD003406 to PXD003417	PXD003406,PXD003407,PXD003408,PXD003409,PXD003410,PXD003411,PXD004312,PXD003413,PXD003414,PXD003415,PXD003416,PXD003417	yes	no	no	no	no	no
PXD003413	27025457	Contribution of Human Fibroblasts and Endothelial Cells to the Hallmarks of Inflammation as Determined by Proteome Profiling	Human(Homo sapiens)[9606]	NCBITaxon:9606	HUVEC(Human umbilical vein endothelial cells)	na	EFO:0002451	na	na	trypsin	MS:1001251	2	25	0.02	25 ppm	20ppm	oxidation (methionine), acetylation(N-terminal protein)	35#M,1#N-term(Protein)	carbamidomethylation (Cysteine)	4#C	bottom-up	PRIDE:0000428	QExactive orbitrap mass spectrometer,equipped with a nanospray ion source (Thermo Fisher Scientific),coupled to the nano HPLC system	MS:1001911	na	a comprehensive proteome study of inflammatory activated primary human endothelial cells and fibroblasts. Comparative proteome analysis determine common and cell type-specific inflammation signatures comprising novel candidate marker molecules and related expression patterns of transcription factors.	B- and T lymphocytes,MaxQuant,NHDF(Normal Human Dermal Fibroblasts)	accessible viaProteomeXchange with identifier PXD003406 to PXD003417	PXD003406,PXD003407,PXD003408,PXD003409,PXD003410,PXD003411,PXD004312,PXD003413,PXD003414,PXD003415,PXD003416,PXD003417	yes	no	no	no	no	no
PXD003414	27025457	Contribution of Human Fibroblasts and Endothelial Cells to the Hallmarks of Inflammation as Determined by Proteome Profiling	Human (Homo sapiens) [9606]	NCBITaxon:9606	Primary HUVEC , Normal human dermal fibroblasts (NHDF)	na	EFO:0002451,BTO:0003185	label free	MS:1002038	trypsin	MS:1001251	2	25	0.02	25 ppm	20 ppm	oxidation (methionine), acetylation (protein N-terminal)	35#M,1#N-term(Protein)	carbamidomethylation (cysteine)	4#C	shotgun proteomics	PRIDE:0000429	QExactive orbitrap mass spectrometer	MS:1001911	HCD (higher energy collisional dissociation)	Proteins were submitted to a data-dependent bottom up analyticalplatformusingaQExactiveorbitrapandtheMaxQuant software for protein identification and label-free quantification.Resultswerefurthercombinedwithsimilarly generated data previously obtained from the analysis of inflammatoryactivatedperipheralbloodmononuclearcells. Applying a false discovery rate of less than 0.01 at both, peptide and pr…	specific inflammatory response, secretome, mass spectrometry, primary human fibroblasts, endothelial cells	this article has multiple projects	PXD003406,PXD003414,PXD003417	yes	no	no	no	yes	no
PXD003519	29133510	Single Cell Immuno-Laser Microdissection Coupled to Label-Free Proteomics to Reveal the Proteotypes of Human Brain Cells After Ischemia	Human (Homo sapiens) [9606]	NCBITaxon:9606	brain tissue	BTO:0000142	na	label free	MS:1002038	trypsin	MS:1001251	1	10	0.6	10 ppm	0.6 Da	oxidation (methionine)	35#M	carbamidomethylation (cysteine)	4#C	shotgun proteomics	PRIDE:0000429	(LTQ) Orbitrap Velos Pro	MS:1001742	CID (collision induced dissociation)	In this study, post-mortem brain slices from ischemic stroke patients were obtained corresponding to infarcted (IC) and contralateral (CL) areas. By means of laser microdissection, neurons and blood brain barrier structures (BBB) were isolated and analyzed using label-free quantification. MS data are available via ProteomeXchange with identifier PXD003519. Ninety proteins were identified only in …	ischemia, blood brain barrier (BBB), brain tissue, label free quantification	na	no	yes	no	no	no	no	no
PXD003534	26933193	Adjuvant-induced Human Monocyte Secretome Profiles Reveal Adjuvant- And Age-specific Protein Signatures	Human(Homo sapiens)[9606]	NCBITaxon:9606	blood	BTO:0000089	na	na	na	trypsin	NCIT:C84232	1	10	0.02	10 ppm	0.02Da	oxidation(methionine), Glu->pyroGlu (N-terminal), Gln->pyroGlu	35#M,27#E(N-term),28#Q(N-term)	carbamidomethylation (Cysteine)	4#C	na	na	nanoflow ultrahigh-performance liquid chromatography (UPLC) system hyphenated with a quadrupole-Orbitrap mass spectrometer.	MS:1002271	na	Alum, MPLA and R848 give rise to distinct and age-specific monocyte secretome profiles, paralleling responses to adjuvant-containing vaccines	Alum, MPLA,Mosquirix	mascot search engine settings	no	yes	no	no	no	no	no
PXD003551	26949251	The cell proliferation antigen Ki-67 organises heterochromatin	Human (Homo sapiens) [9606], mouse (mus musculus) [10090]	NCBITaxon:9606,NCBITaxon:10090	Normal human diploid foreskin fibroblasts (HDF) , the hTERT-immortalized foreskin fibroblast cell line (BJ hTERT) , U2OS, HeLa, NIH3T3 mouse fibroblasts	na	CLO:0009454,CLO:0003684,CLO:0037211	SILAC	MS:1002611	trypsin	MS:1001251	2	20	0.05	20 ppm	0.05 Da	oxidation (methionine), phosphorylation (serine, threonine)	35#M,21#S,21#T	carbamidomethylation (cysteine)	4#C	na	na	Q Exactive mass spectrometer coupled to an Ultimate 3000 RSLC	MS:1001911	na	Here, we show that Ki-67 controls heterochromatin organisation. Altering Ki-67 expression levels did not significantly affect cell proliferation in vivo. Ki-67 mutant mice developed normally and cells lacking Ki-67 proliferated efficiently. Conversely, upregulation of Ki-67 expression in differentiated tissues did not prevent cell cycle arrest. Ki-67 interactors included proteins involved in nucl…	cell proliferation, Ki-67, heterochromatin, antigen Ki-67	The Homo sapiens Complete Proteome database was queried locally using the Mascot search engine. Raw data analysis was performed using the MaxQuant software using standard parameters except Requantity option set as TRUE or FALSE. Peak lists were searched against the UniProt Mouse database.	no	yes	no	no	no	no	no
PXD003587	30090399	Acetaminophen-induced S-nitrosylation andS-sulfenylation signalling in 3D culturedhepatocarcinoma cell spheroids.	Human(Homo sapiens)[9606]	NCBITaxon:9606	C3A spheroids	na	CLO:0002119	Iodo TMT 6plex	MS:1002615	trypsin	MS:1001251	2	10	0.02	10 ppm	20mmu	oxidation(methionine), idoTMT(cysteine)	35#M,1341#C	carbamidomethylation(cysteine)	4#C	na	na	orbitrap fusion	MS:1002416	na	In this article,we have analysed the redox proteome ofthe hepatocellular cell line HepG2/C3A treated with therapeutic doses of APAP and quantitated both individual protein abundance and their reversible S-nitrosylation (SNO) and S-sulfenylation (SOH) modificationsby mass spectrometry	tandem ms, mascot	na	no	yes	no	no	no	no	no
PXD003651	28396511	Database-augmented Mass Spectrometry Analysis of Exosomes Identifies Claudin 3 as a Putative Prostate Cancer Biomarker	Human (Homo sapiens) [9606]	NCBITaxon:9606	human metastatic PC3 and benign PNT1 A cells	na	CLO:0008395,BTO:0003068	na	na	trypsin	MS:1001251	1	5	0.4	5 ppm	0.4 Da	deamination (glutamine,asparagine), oxidation (methionine)	35#M,7#Q,7#N	carbamidomethylation (cysteine)	4#C	na	na	LTQ orbitrap XL mass spectrometer	MS:1000556	na	principle study for a proteomics-based identification pipeline, implementing existing data sources, to exemplarily identify exosome-based biomarker candidates in prostate cancer. Exosomes from malignant PC3 and benign PNT1A cells and from FBS-containing medium were isolated using sequential ultracentrifugation. Exosome and control samples were analyzed on an LTQ-Orbitrap XL mass spectrometer. Pro…	cancer, ELISA, MASCOT, PROTTER database, TEM, prostate cancer	na	no	yes	no	no	no	no	no
PXD003666	27535802	MASP-3 is the exclusive profactor D activator in resting blood: the lectin and the alternative complement pathways are fundamentally linked	Human (Homo sapiens) [9606]	NCBITaxon:9606	blood (plasma)	UBERON:0001969	na	na	na	trypsin	MS:1001251	na	10	0.50	10.0 ppm	0.50 Da	oxidation (methionine), deamidation (asparagine, glutamine)	35#M,7#Q,7#N	carboxymethylation (cysteine)	4#C	na	na	Orbitrap Fusion mass spectrometer by a nano-spray ion source	MS:1002416	na	studies on a MASP-1/MASP-3-deficient human patient produced contradicting results. In normal resting blood unperturbed by ongoing coagulation or complement activation, factor D is present predominantly in its active form, suggesting that resting blood contains at least one pro-FD activating proteinase that is not a direct initiator of coagulation or complement activation. We have recently showed …	MASP-3, factor D activator, blood, directed protein evolution	All acquired spectra were processed and analyzed using Mascot (Matrix Science, version 2.5.1) and the human-specific Swiss-Prot database	no	yes	no	no	no	no	no
PXD003709	27226594	Preferential Phosphorylation on Old Histones During Early Mitosis in Human Cells	Human (Homo sapiens) [9606]	NCBITaxon:9606	HeLaS3cells, HFF cells and 293T cells	na	CLO:0003696,BTO:0004784,EFO:0001082	SILAC	MS:1002611	trypsin	MS:1001251	na	na	na	na	na	[12C6,14N4] and [13C6, 14N4] (arginine) , [12C5, 14N] and [13C5, 15N] (proline) , [12C , H3] and [13C, D3] (AdoMet)	268#P	na	na	phosphopeptide enrichment	PRIDE:0000588	Q Exactive (Q-E), Orbitrap Elite, Orbitrap Velos Pro	MS:1001911,MS:1001910,MS:1001742	HCD (higher energy collisional dissociation) , CID(collision induced dissociation)	.WeshowthathistonePTMs canbegroupedintothreecategoriesaccordingtotheirdistributions.Mostlysinemono-methylationandacetylationPTMsare eithersymmetricallydistributedonoldandnewhistonesorare enrichedonnewhistones.Incontrast,mostdi-andtri-methylation PTMs are enriched on old histones, suggesting that the inheritance of different PTMs is regulated distinctly. Intriguingly,oldandnewhistonesaredistinctin…	phosphorylation, mitosis, post translational modification (PTM)	na	no	yes	no	no	no	yes	no
PXD003774	27918545	Warfarin Traps Human Vitamin K Epoxide Reductase in an Intermediate State During Electron Transfer	Human(Homo sapiens)[9606]	NCBITaxon:9606	HEK293	na	EFO:0001184	isotope-codedN-ethylmaleimide (NEM)	PRIDE:0000606	chymotrypsin	NCIT:C76568	na	na	na	na	na	deuterated-NEM(cysteine), NEM(cysteine), oxidation (methionine)	776#C,108#C,35#M	na	na	na	na	LTQ Orbitrap XL mass spectrometer	MS:1000556	na	warfarin blocks a dynamic electron-transfer process in hVKOR.	disulfide-bonded peptides,human vitamin K epoxide reductase (hVKOR)	na	no	yes	no	no	no	no	no
PXD004026	27216279	Clickable Glutathione Approach for Identification of Protein Glutathionylation in Response to Glucose Metabolism	Human (Homo sapiens) [9606]	NCBITaxon:9606	HEK293 cells	na	BTO:0000007	na	na	trypsin	MS:1001251	na	na	na	na	na	na	na	na	na	bottom-up proteomics	PRIDE:0000428	LTQ-Orbitrap Discovery mass spectrometer chromatography (UPLC)	MS:1000555	na	In this report, we use our clickable glutathione approach, which form clickable glutathione (azido-glutathione) by using a mutant of glutathione synthetase (GS M4), for detection and identification of protein glutathionylation in response to glucose starvation	Glutathionylation	ThermoFisher ?.raw? files, were processed using MaxQuant44	no	yes	no	no	no	no	no
PXD004051	27761513	Insulin Stimulated MCF7 Breast Cancer Cells: Proteome Dataset	Human(Homo sapiens)[9606]	NCBITaxon:9606	MCF7 breast cancer cell	na	CLO:0007606	na	na	trypsin	MS:1001251	2	500	1	2amu	1amu	na	na	na	na	na	na	LTQ linear ion trap masss pectrometer	MS:1002835	CID	The proteome data provided in this article were acquired from MCF7 breast cancer cells stimulated with insulin, and were generated by using a 2D-SCX (strong cation exchange)/RPLC (reversed phase liquid chromatography) separation protocol followed by tandem mass spectrometry (MS) detection.	protein?proteininteractions,MCF7 breast cancer cells; Mass spectrometry; Proteomics.	na	no	yes	no	no	no	no	no
PXD004219	28765563	Quantitative Proteomics of Cerebrospinal Fluid in Paediatric Pneumococcal Meningitis	Human (Homo sapiens) [9606], Streptococcus pneumoniae reference strain	NCBITaxon:9606,NCBITaxon:171101	cerebrospinal fluid (CSF)	BTO:0000237	na	label free	MS:1002038	trypsin	MS:1001251	1	10	0.6	10 ppm	0.6 Da	oxidation (methionine)	35#M	carbamidomethylation (cysteine)	4#C	shotgun quantitative proteomic	PRIDE:0000429	nanoAcquity chromatography system coupled to LTQ-Orbitrap Velos	MS:1001742	na	We used mass spectrometry based quantitative proteomics to identify protein changes in cerebrospinal fluid from children with Streptococcus pneumoniae infection, compared with children admitted to hospital with bacterial meningitis symptoms but negative diagnosis. Samples were analysed, by label free proteomics, in two independent cohorts (cohort 1: cases (n = 8) and hospital controls (n = 4); co…	Quantitative Proteomics, Cerebrospinal Fluid, Paediatric Pneumococcal Meningitis,	na	no	yes	no	no	no	no	no
PXD004312	30266947	A Mitochondrial Proteome Profile Indicative of Type 2 Diabetes Mellitus in Skeletal Muscles	Human(Homo sapiens)[9606]	NCBITaxon:9606	skeletal muscles	BTO:0001103	na	na	na	semi-trypsin	NCIT:C84232	na	10	na	10 ppm	na	oxidation (methionine),carbamylation(N-terminal)	35#M,5#N-term	carbamidomethylation (Cysteine)	4#C	Bottom-up	PRIDE:0000428	7-tesla Fourier transform ion cyclotron resonance mass spectrometer	MS:1000079	CID	we performed extensive proteome profiling of mitochondria from skeletal muscles in nine T2DM patients and nine nondiabetic controls	DEPs,downregulated oxidative phosphorylation	na	no	yes	no	no	no	no	no
PXD004320	27803950	Multi-OMIC pro?ling of survival and metabolic signaling networks in cells subjected to photodynamic therapy	Human(Homo sapiens)[9606]	NCBITaxon:9606	Human epidermoid carcinoma (A431) cells, murinemacrophages (RAW 264.7), Human umbilical vein endothelial cells (HUVECs), Human perihilar cholangiocarcinoma (SK-ChA-1) cell.	na	CLO:0001591,CLO:0008753,EFO:0002451,BTO:0004655	Label-free quanti?cation	MS:1002038	Trypsin/P	MS:1001313	2	4.5	0.05	4.5 ppm	0.05 Da	Oxidation (Methionine), Phosphorylation (Tyrosine, Serine, Threonine)	35#M,21#Y,21#S,21#T	Carbamidomethylation (cysteine)	4#C	na	na	Q Exactive Plus Orbitrap	MS:1001911	HCD	. In this study, tumor-comprising cells (i.e., vascular endothelial cells, macrophages, perihilar cholangiocarcinoma cells, and EGFR-overexpressing epidermoid cancer cells) were treated with the photosensitizer zinc phthalocyanine that was encapsulated in cationic liposomes (ZPCLs). The postPDT survival pathways and metabolism were studiedfollowing sublethal (LC50) and supralethal (LC90) PDT.	Cancer therapy, Metallated phthalocyanines, Reactive oxygen species, Therapeutic recalcitrance, Tumor targeting	na	no	yes	no	no	no	no	no
PXD004334	28246120	KDM3A coordinates actin dynamics with intraflagellar transport to regulate cilia stability	Human(Homo sapiens)[9606]	NCBITaxon:9606	na	na	na	na	na	Trypsin	MS:1001251	na	na	na	na	na	Acetylation(protein N-Terminal), Oxidation(methionine), Monomethylation, Dimethylation, Trimethylation	1#N-term(Protein),35#M,34#K,36#K,37#K	na	na	na	na	liquid chromatography tandem mass spectrometry	NCIT:C122168	na	We demonstrate that absence of KDM3A facilitates ciliogenesis, but these resulting cilia have an abnormally wide range of axonemal lengths, delaying disassembly and accumulating intraflagellar transport (IFT) proteins	KDM3A, yeast2hybrid	na	no	yes	no	no	no	no	no
PXD004443	29599912	Coagulation cascade and complement system in systemic lupus erythematosus	Human (Homo sapiens) [9606]	NCBITaxon:9606	Blood	BTO:0000089	na	iTRAQ	MS:1002622	trypsin	MS:1001251	na	20	0.05	20 ppm	0.05Da	Gln->pyro-glu (N-terminal glutamine),oxidation (methionine),Deamidation(glutamine,asparagine)	28#Q(N-term),35#M,7#Q,7#N	carbamidomethylation(cysteine),iTRAQ-8plex(N-terminal),iTRAQ-8-plex(lysine)	4#C,730#N-term,730#K	na	na	Q-Exactive Orbitrap coupled online to the HPLC , LTQ orbitrap velos	MS:1001911, MS:1001742	HCD (higher energy collisional dissociation)	This study was conducted to (1) characterize coagulation cascade and complement system in systemic lupus erythematosus (SLE); (2) evaluate the associations between coagulation cascade, complement system, inflammatory response and SLE disease severity; (3) test the diagnostic value of a combination of D-dimer and C4 for lupus activity. Transcriptomics, proteomics and metabolomics were performed in…	systemic lupus erythematosus, coagulation cascade, complement system, biomarker, omics	na	no	yes	no	no	no	no	no
PXD004588	28112162	Zika virus disrupts molecular fingerprinting of human neurospheres	Human (Homo sapiens)[9606]	NCBITaxon:9606	Human induced pluripotent stem cells (iPS)	BTO:0006078	na	Label- Free Quantification.	MS:1002038	Trypsin	MS:1001251	1	na	na	na	na	Oxidation (Methionine)	35#M	Carbamidomethylation (Cysteine)	4#C	Shotgun Proteomics	PRIDE:0000429	2-D nano UPLC in Acquity UPLC M-Class System, connected to a Synapt G2-Si mass spectrometer	MS:1001780	Enzymatic Digestion	We show that ZIKV alters the molecular fingerprint of neural stem cells by activating responses to viral replication, Dna damage targets, cell cycle arrest, apoptosis, as well as the downregulation of neurogenic programs.	ZIKA-virus	This study used Progenesis QI for proteomics software package with Apex3D, peptide 3D, and ion accounting informatics	no	yes	no	no	no	no	no
PXD004589	30090875	Multi-region proteome analysis quantifies spatialheterogeneity of prostate tissue biomarkers	Human (Homo sapiens) [9606]	NCBITaxon:9606	Hepatocellular carcinoma	na	EFO:0000182	10-plex tandem mass tag, 6-plex tandem mass tag	PRIDE:0000314	trypsin,lysC	MS:1001251,MS:1001309	2	50	0.1	50 ppm	0.1Da	oxidation(methionine)	35#M	carbamidomethylation(cysteine)	4#C	shotgun proteomics	PRIDE:0000429	5600 TripleTOF	MS:1000932	na	In this article,we quantified proteome intratissue heterogeneity (ITH) based on a multi-region analysis ofprostate tissues using pressure cycling technology and Sequential Windowed Acquisition of all THeoretical fragment ionmass spectrometry	TMT, SWATH-MS	na	no	yes	no	no	no	no	no
PXD004626	27879288	Multi-omics Analysis of Serum Samples Demonstrates Reprogramming of Organ Functions Via Systemic Calcium Mobilization and Platelet Activation in Metastatic Melanoma	Human(Homo sapiens)[9606]	NCBITaxon:9606	blood	BTO:0000089	na	na	na	trypsin/Lys-C	MS:1001251,MS:1001309	2	5	0.02	5 ppm	20ppm	oxidation (methionine),acetylation(N-terminal protein)	35#M,1#N-term(Protein)	carbamidomethylation (Cysteine)	4#C	shotgun proteomics	PRIDE:0000429	Q Exactive mass spectrometer	MS:1001911	HCD	we propose a model how metastatic melanomamay lead to reprogramming of organ functions via formationof platelet activating factors from long-chainpolyunsaturated phosphatidylcholines under oxidativeconditions and via systemic induction of intracellularcalcium mobilization.	cachexia,MaxQuant	multiple project " PXD004624-26"	PXD004624,PXD004625,PXD004626	yes	no	no	no	no	no
PXD004874	27934856	Bulk cell density and Wnt/TGFbeta signalling regulate mesendodermal patterning of human pluripotent stem cells	Mouse (Mus Musculus)[10090],Human (Homo sapiens)[9606]	NCBITaxon:10090,NCBITaxon:9606	mouse embryonic ?broblasts (MEFs)	BTO:0004725	na	Label-free Quantification	MS:1002038	Trypsin	MS:1001251	na	na	na	na	na	na	na	na	na	Shotgun Proteomics	PRIDE:0000429	LTQ-Orbitrap Velos mass spectrometer	MS:1000449	CID	Bulk cell density and Wnt/TGFbeta signalling regulate mesendodermal patterning of human pluripotent stem cells	Human, Cardiomyocytes, Secretome, LC-MSMS	na	no	yes	no	no	no	no	no
PXD004935	27811184	Coupling an EML4-ALK-centric Interactome With Rna Interference Identifies Sensitizers to ALK Inhibitors	Human(Homo sapiens)[9606]	NCBITaxon:9606	H3122 NSCLC(non-small cell lung carcinoma) cell line	na	EFO:0003060	label-free quantitation (LFQ)	MS:1002038	trypsin	MS:1001251	2	1080	0.8	1.08Da	0.8Da	carbamidomethylation (Cysteine), oxidation (Methionine),deamidation (Asparagine, Glutamine),phosphorylation(Serine, Theonine, Tryptophan)	4#C,35#M,7#N,7#Q,21#S,21#T,21#Y	na	na	AP-MS	PRIDE:0000431	nanoflow liquid chromatography (U3000, Dionex, Sunnyvale, CA) coupled to an electrospray hybrid ion trap mass spectrometer(LTQ-Orbitrap, Thermo, San Jose, CA)	MS:1000449	na	We identified a network of 464 proteins composed of subnetworks with differential response to ALK inhibitors	NSCLC(Non-small cell lung cancer),tyrosine,phosphoproteomics	Sequest and Mascot searches both were performed against human entries in the UniProt database.	no	yes	no	no	no	no	no
PXD004987	27841354	Proteomic Characterization of Neuromelanin Granules Isolated From Human Substantia Nigra by Laser-Microdissection	Human(Homo sapiens)[9606]	NCBITaxon:9606	Brain tissue	BTO:0000142	na	na	na	trypsin	MS:1001251	1	5	0.4	5 ppm	0.4 Da	Oxidation (methionine)	35#M	Carbamidomethylation (Cysteine)	4#C	na	na	LC system was directly coupled with a nano electrospray ionization source (Thermo Fisher Scientific) to the Orbitrap Elite mass spectrometer	MS:1001910	CID	the parameters for NM granules isolation were tested using postmortem tissues from human donors without neurological or neurodegenerative diseases and lacking neuropathological abnormalities	Neuromelanin,substantia nigra,brain tissue	na	no	yes	no	no	no	no	no
PXD005013	29156374	Genetic profiling and surface proteome analysis of human atrial stromal cells and rat ventricular epicardium-derived cells reveals novel insights into their cardiogenic potential.	Human (Homo sapiens)[9606], rat(rattus norvegicus)[10116]	NCBITaxon:9606,NCBITaxon:10116	Heart Sample	BTO:0000562	na	na	na	na	na	na	20	45	20 ppm	4.5ppm	Acetylation(N-Terminal), Oxidation (methionine)	1#N-term(Protein),35#M	carbamidomethylation	4#C	na	na	Orbitrap Elite mass spectrometer	MS:1001910	na	Our study indicates that EPDC and ASC have a similar molecular phenotype related to cardiac healing/regeneration. The cell surface proteome repository will help to further unravel the molecular details of their cardio-regenerative potential and their role in cardiac diseases.	surface proteome, EPDC, stem cell	SEARCH PARAMETERS ARE DERVIVED FROM PRIDE DATABASE	no	yes	yes	no	no	no	no
PXD005073	28674151	Kinase activity ranking using phosphoproteomics data (KARP) quantifies the contribution of protein kinases to the regulation of cell viability	Human (Homo sapiens) [9606]	NCBITaxon:9606	B-cell lymphoma, leukemia cell lines , Murine stromal cells	na	BTO:0000737,BTO:0002064,BTO:0001690	label free	MS:1002038	trypsin	MS:1001251	1	10	0.6	10 ppm	600 mmu	oxidation (methionine), phosphorylation (serine, threonine, tyrosine), pyro-Glu (N-terminal)	35#M,21#S,21#T,21#Y,27#E(N-term)	carbamidomethylation (cysteine)	4#C	Phosphopeptide Enrichment	PRIDE:0000588	LTQ-Orbitrap-XL mass spectrometer	MS:1000556	CID (collision induced dissociation)	Here, we report a computational approach that uses mass spectrometrybased phosphoproteomics data to rank protein kinases based on their contribution to cell regulation. We found that the scores returned by this algorithm, which we have termed kinase activity ranking using phosphoproteomics data (KARP), were a quantitative measure of the contribution that individual kinases make to the signaling o…	phosphoproteomics, kinase activity ranking using phosphoproteomics data (KARP), cell viability, MASCOT	na	no	yes	no	no	no	no	no
PXD005090	28493397	A Recurrent De Novo Mutation in ACTG1 Causes Isolated Ocular Coloboma	Human(Homo sapiens)[9606]	NCBITaxon:9606	HEK293	na	EFO:0001182	dimethyl	PRIDE:0000513	na	na	na	25	0.5	25 ppm	0.5 Da	oxidation (methionine),light and heavy, dimethyl label (Lysine, N-terminal)	35#M,36#K,36#N-term,1291#N-term,1291#K	Carbamidomethylation (Cysteine)	4#C	Affinity purification coupled with mass spectrometry proteomics	PRIDE:0000431	coupling a RSLCnano LC system (Thermo Scientific) to a micrOTOF-II mass spectrometer	MS:1001540	na	This identified de novo mutations in 10 different genes in eight probands. Three of these genes encoded proteins associated with actin cytoskeleton dynamics: ACTG1, TWF1, and LCP1	ACTG1, eye development, ocular coloboma, tissue fusion	search pameter setting were obtained from PRIDE data processing protocol seaction.	no	yes	yes	no	no	no	no
PXD005152	28077445	Human Antiviral Protein IFIX Suppresses Viral Gene Expression During Herpes Simplex Virus 1 (HSV-1) Infection and Is Counteracted by Virus-induced Proteasomal Degradation	Human(Homo sapiens)[9606]	NCBITaxon:9606	HEK293T	na	EFO:0001184	na	na	trypsin	NCIT:C84232	2	10	0.5	10 ppm	0.5Da	oxidation (Methionine), phosphorylation (Serine,Theonine,Tryosine)	35#M,21#S,21#T,21#Y	carboxyamidomethylation (Cysteine)	4#C	AP-MS	PRIDE:0000431	LTQ-Orbitrap Velos	MS:1001742	CID	We find that IFIX has adynamic localization during infection that changes fromdiffuse nuclear and nucleoli distribution in uninfectedcells to discrete nuclear puncta early in infection	protein-protein interaction,Immunoblotting, Ubiquitin,HSV-1	na	no	yes	no	no	no	no	no
PXD005187	28417017	Galectin-1 inhibition attenuates profibrotic signaling in hypoxia-induced pulmonary fibrosis	Human (Homo sapiens) [9606]	NCBITaxon:9606	H441 lung epithelial cells	na	CLO:0008087	SILAC (stable isotope labeling using amino acid in a cell culture)	MS:1002611	trypsin	MS:1001251	na	na	na	na	na	na	na	na	na	na	na	Q Exactive plus	MS:1002634	na	we demonstrate that hypoxia is a physiological insult that contributes to pulmonary ?brosis (PF) and de?ne its molecular roles in pro?brotic activation of lung epithelial cells. Hypoxia increased transcription of pro?brotic genes and altered the proteomic signatures of lung epithelial cells. Network analysis of the hypoxic epithelial proteome revealed a crosstalk between transforming growth facto…	Galectin-1, pulmonary fibrosis, hypoxia, lung epithelial cells	na	no	yes	no	no	no	no	no
PXD005252	29804834	Time-Resolved Analysis Reveals Rapid Dynamics and Broad Scope of the CBP/p300 Acetylome	Human (Homo sapiens) [9606], Mouse (mus musculus) [10090]	NCBITaxon:9606,NCBITaxon:10090	mouse embryonic fibroblasts (MEF), Kasumi-1 cells, 293FT cells	na	EFO:0004040,BTO:0005029,EFO:0001082	SILAC (stable isotope labeling using amino acid in a cell culture)	MS:1002611	trypsin	MS:1001251	na	na	na	na	na	na	na	na	na	bottom-up	PRIDE:0000428	Q Exactive HF mass spectrometer	MS:1002523	na	Here, we combined quantitative proteomics with CBP/p300-specific catalytic inhibitors, bromodomain inhibitor, and gene knockout to reveal a comprehensive map of regulated acetylation sites and their dynamic turnover rates. CBP/p300 acetylates thousands of sites, including signature histone sites and a multitude of sites on signaling effectors and enhancer-associated transcriptional regulators. Ti…	acetylation,CBP, p300, proteomics, mass spectrometry, A-485, bromodomain, acetylation kinetics, enhancer, gene transcription	na	no	yes	no	no	no	no	no
PXD005267	28667326	Quantitative Proteomics Analysis of Plasmodium vivax Induced Alterations in Human Serum during the Acute and Convalescent Phases of Infection	Human (Homo sapiens)[9606]	NCBITaxon:9606	Blood Serum Sample	BTO:0000133	na	iTRAQ	PRIDE:0000313	Trypsin	MS:1001251	1	75	0.4	75 ppm	0.4Da	Oxidation (methionine)	35#M	Carbamidomethylation (Cysteine)	4#C	na	na	na	na	na	We present the first comprehensive serum proteomics analysis of vivax malaria patients with different levels of parasitemia and during the acute and convalescent phases of the infection.	Human, Longitudinal, LC-MS	na	no	yes	no	no	no	no	no
PXD005466	29774096	GSTM3 and GSTP1: novel players driving tumor progression in cervical cancer	Human(Homo sapiens)[9606]	NCBITaxon:9606	Cervical cancer cell lines (SiHa,HeLa)	na	BTO:0001967,CLO:0009017,EFO:0001185	na	na	trypsin	MS:1001251	na	na	na	na	na	na	na	na	na	gel based	PRIDE:0000305	nanoLC-MS/MS system (Q-TOF )	MS:1002791	na	We performed analyses on CC tumor proteome dynamics and identified GSTM3 and GSTP1 as novel potential therapeutic targets. Knockdown of these proteins showed that they are involved in cell survival, cell proliferation and cellular evasion of apoptosis.	GSTM3,GSTP1,cervical cancer,morpholinos,targets genes.	na	no	yes	no	no	no	no	no
PXD005508	29507054	Targeting CDK2 overcomes melanoma resistance against BRAF and Hsp90 inhibitors	Human(Homo sapiens)[9606]	NCBITaxon:9606	SK-Mel 24, SK-Mel 28, A375, A375DR1,MNT-1 ,MNT-1-DR100, melanoma cell line	na	CLO:0009042,CLO:0009043,CLO:0001582,CLO:0009042,BTO:0002946,BTO:0002946,BTO:0000849	TMT-10plex	PRIDE:0000314	Trypsin/P	MS:1001313	2	4.5	na	4.5 ppm	na	oxidation (Methionine),phosphorylation (Serine,Threonine,tryosine)	35#M,21#S,21#T,21#Y	carbamidomethylation (Cysteine)	4#C	Shotgun proteomics	PRIDE:0000429	HF Q-Exactive Orbitrap connected to Dionex UHPLC system	MS:1002877	HCD	Our results indicate that treatment withthe Hsp90i panel, with the exception of novobiocin, yielded complete loss of viability in SK-Mel 24, while in SK-Mel 28 the viability was only partially reduced.	CDK2; Hsp90 and BRAF inhibitors; melanoma; MITF; proteomics	Multiple project	PXD005547,PXD005518,PXD005508	yes	no	no	no	no	no
PXD005613	28159936	Nitration of Tyrosines in Complement Factor H Domains Alters Its Immunological Activity and Mediates a Pathogenic Role in Age Related Macular Degeneration	Human(Homo sapiens)[9606]	NCBITaxon:9606	Eye	BTO:0000439	na	na	na	trypsin	NCIT:C84232	2	6	0.5	6 ppm	0.5 Da	oxidation (methionine, tryptophan),gln->pyroGlu, Nitro (tyrosine)	35#M,35#W,28#Q,354#Y	carbamidomethylation (Cysteine)	4#C	AP-MS	PRIDE:0000431	na	na	na	We purified nitrated CFH fromretinae from 2 AMD patients	complement factor H,macular degeneration,nitrosative stress,retina	na	no	yes	no	no	no	no	no
PXD005620	28376875	TGFBR2-dependent alterations of exosomal cargo and functions in Dna mismatch repair-deficient HCT116 colorectal cancer cells	Human(Homo sapiens)[9606]	NCBITaxon:9606	dMMR CRC cell lines (HCT116, RKO, LoVo) and MMR-proficient CRC cell line (SW948),KM12 cells,HepG2	na	EFO:0002824,EFO:0001232,EFO:0006639,EFO:0002375,EFO:0006282,EFO:0001187	Fluorescent labeling	CHMO:0001676	trypsin	MS:1001251	1	5	0.4	5 ppm	0.4Da	oxidation (methionine),deamidation (asparagine, glutamine)	35#M,7#N,7#Q	Carbamidomethylation (Cysteine)	4#C	na	na	ultra-high-performance LC system was connected online to an LTQ Orbitrap XL mass spectrometer	MS:1000556	na	Our results indicate that the coding MSI phenotype of Dna mismatch repair-deficient CRC cells is maintained in their exosomal Dna	Exosomes, Intercellular communication, Proteomics, Transforming Growth Factor Beta Receptor Type 2,Dna mismatch repair deficiency, Microsatellite instability, Colorectal cancer	na	no	yes	no	no	no	no	no
PXD005650	28634120	Highly reproducible improved label-free quantitative analysis of cellular phosphoproteome by optimization of LC-MS/MS gradient and analytical column construction	Human(Homo sapiens)[9606]	NCBITaxon:9606	Jurkat cell	na	CLO:0007043	Label free quantification	MS:1002038	trypsin	MS:1001251	na	na	na	na	na	na	na	na	na	phosphopeptide enrichment	PRIDE:0000587	Q Exactive mass spectrometer	MS:1001911	na	our results reveal the analytical power of optimized chromatography using sub 2 ?m particles for the analysis of the T cell phosphoproteome to reveal a vast landscape of significantly altered phosphorylation changes in response to T cell receptor stimulation.	Sub 2 ?m C18 particles; Label free quantification; LC-MS/MS; Quantitative Phosphoproteomics; T Cell signaling	na	no	yes	no	no	no	no	no
PXD005693	29535834	Innovative methodology for the identification of soluble biomarkers in fresh tissues	Human (Homo sapiens) [9606]	NCBITaxon:9606	colorectal liver metastases (CRC-LM) cells	BTO:0001616	na	label-free	MS:1002038	trypsin,PNGaseenzyme	MS:1001251,	na	5	0.01	5 ppm	10 ppm	oxidation(methionine),deammidation(asparagine, aspartic acid)	35#M,7#N,7#D	carbamidomethylation(cysteine)	4#C	2D-LC-MS/MS analysis	PRIDE:0000429	Q-Exactive mass spectrometer	MS:1001911	na	We demonstrate that the procedure efficiently allows the extraction, within a few minutes, of a wide variety of biomolecules holding diagnostic and prognostic potential while keeping both tissue morphology and antigenicity unaltered. Our method enables, for the first time, both clinicians and scientists to explore identical clinical material regardless of its origin and size, which has a major po…	biomarkers; proteomic; miRnas; tDna; metabolomic	this article has multiple projects	PXD005709,PXD005693	yes	no	no	no	no	no
PXD005709	29535834	Innovative methodology for the identification of soluble biomarkers in fresh tissues	Human (Homo sapiens) [9606]	NCBITaxon:9606	colorectal liver metastases (CRC-LM) cells	na	BTO:0001616	label-free	MS:1002038	trypsin,PNGaseenzyme	MS:1001251,	na	5	0.01	5 ppm	10 ppm	oxidation(methionine),deammidation(asparagine, aspartic acid)	35#M,7#N,7#D	carbamidomethylation(cysteine)	4#C	2D-LC-MS/MS analysis	PRIDE:0000429	Q-Exactive mass spectrometer	MS:1001911	na	We demonstrate that the procedure efficiently allows the extraction, within a few minutes, of a wide variety of biomolecules holding diagnostic and prognostic potential while keeping both tissue morphology and antigenicity unaltered. Our method enables, for the first time, both clinicians and scientists to explore identical clinical material regardless of its origin and size, which has a major po…	biomarkers; proteomic; miRnas; tDna; metabolomic	this article has multiple projects	PXD005709,PXD005693	yes	no	no	no	no	no
PXD006036	28436968	Metabolic Control of Primed Human Pluripotent Stem Cell Fate and Function by the miR-200c-SIRT2 Axis	Human(Homo sapiens)[9606]	NCBITaxon:9606	Human BJ dermal fibroblasts (hDF) and HEK293T cells	BTO:0004419	EFO:0001184	na	na	trypsin	MS:1001251	na	na	na	na	na	na	na	na	na	shotgun proteomics	PRIDE:0000429	LTQ-Orbitrap	MS:1000449	CID	we report that downregulation of SIRT2 and upregulation of SIRT1 is a molecular signature of primed hPSCs and that SIRT2 critically regulates metabolic reprogramming during induced pluripotency by targeting glycolytic enzymes including aldolase, glyceraldehyde-3-phosphate dehydrogenase, phosphoglycerate kinase, and enolase	cancer cells,Warburg effect	na	no	yes	no	no	no	no	no
PXD006095	29164889	Comparison of Quantitative Mass Spectrometry Platforms for Monitoring Kinase ATP Probe Uptake in Lung Cancer	Human (Homo sapiens) [9606]	NCBITaxon:9606	NCI-H1993 cells	na	CLO:0008036	label free	MS:1002038	trypsin	MS:1001251	3	15	0.05	15 ppm	0.05 Th	carbamidomethylation (cysteine), desthiobiotinylation (lysine), oxidation (methionine)	4#C,1031#K,35#M	na	na	na	na	Q-Exactive Plus MS	MS:1002634	ESI-QUAD	To examine the impact of different MS acquisition platforms, quantification of kinase ATP-uptake following kinase inhibitor treatment was analyzed by four different methods: LC-MS/MS with DDA and DIA, LC-MRM, and LC-PRM. For discovery datasets, DIA increased the number of identified kinases by 21% and reduced missingness when compared to DDA. In this context, MRM and PRM were most effective at id…	Lung Cancer; Targeted Therapy; Activity-Based Protein Profiling; Quantitative Mass Spectrometry	search parameter setting were obtained from PRIDE dataProcessingProtocol section ; this article has multiple projects	PXD006095,PXD006096	yes	yes	no	no	no	no
PXD006137	28669814	Quick 96FASP for high throughput quantitative proteome analysis	Human(Homo sapiens)[9606]	NCBITaxon:9606	UHKPC27 cell	na	NCIT:1284813	label-free quantitation (LFQ)	MS:1002038	trypsin	MS:1001251	2	10	0.02	10 ppm	0.02 Da	oxidation (Methionine),acetylation(N-terminal protein),deamidation (asparagine,glutamine)	35#M,1#N-term(Protein),45#N-term,7#N,7#Q	carbamidomethylation (Cysteine)	4#C	Shotgun proteomics	PRIDE:0000429	Ultimate 3000-nano LC system coupled to a Q-Exactive mass spectrometer	MS:1001911	HCD	We conclude that the q96FASP approach promises to be a promising cost- and time-effective method for shotgun proteomics and will be particularly useful in large scale biomarker discovery studies.	FASP; 96-well Filter plate; Quantitative proteomics; Klebsiella pneumoniae; Human urine; Applications	na	no	yes	no	no	no	no	no
PXD006176	29880488	Weibel-Palade Body Localized Syntaxin-3 Modulates Von Willebrand Factor Secretion From Endothelial Cells	Human (Homo sapiens) [9606]	NCBITaxon:9606	HUVECs (human umbilical vein endothelial cells)	na	EFO:0002451	label free	MS:1002038	trypsin	MS:1001251	2	20	0.02	20 ppm	0.02 Da	na	na	na	na	na	na	Orbitrap Fusion Tribrid mass spectrometer	MS:1002732	na	In this study, we investigate the function of syntaxin-3 in VWF secretion. Approach and Results?In human umbilical vein endothelial cells and in blood outgrowth endothelial cells (BOECs) from healthy controls, endogenous syntaxin-3 immunolocalized to WPBs. A detailed analysis of BOECs isolated from a patient with variant microvillus inclusion disease, carrying a homozygous mutation in STX3 (STX3?…	endothelial cells , SnaRE protein , syntaxin , von Willebrand factor , Weibel-Palade body	In this article, Standard andromeda search engine settings are mentioned.	no	yes	no	no	no	no	no
PXD006179	jpb.1000447	Differential Quantitative Proteomics of Human Microvascular Endothelial Cells 1 by iTRAQ Reveals Palladin to be a New Biomarker During TGF-?1 Induced Endothelial Mesenchymal Transition	Human (Homo sapiens) [9606]	NCBITaxon:9606	Human Microvascular Endothelial Cells (HMEC-1)	na	BTO:0002828	ITRAQ (isobaric tag for relative and absolute quantitation)	MS:1002622	trypsin	MS:1001251	1	na	na	na	na	oxidation (methionine)	35#M	iTRAQ labeling (peptide N-terminal, lysine), MMTS (cysteine)	214#N-term,214#K,39#C	bottom-up	PRIDE:0000428	Orbitrap Velos type mass spectrometer	MS:1001742	HCD (higher energy collisional dissociation)	The study uses global quantitative proteomics to investigate the molecular mechanisms behind the induction of endothelial-mesenchymal transition (EndMT) by transforming growth factor?? (TGF-?). Orbitrap Velos mass spectrometers and iTRAQ ? a labeling-based analysis were used to perform a global and quantitative comparison of two proteomes of Human Microvascular Endothelial Cells-1 (HMEC-1) treate…	EndMT; Fibrosis; Palladin; Snail	na	no	yes	no	no	no	no	no
PXD006386	29880886	The natural compound GL22, isolated from Ganoderma mushrooms, suppresses tumor growth by altering lipid metabolism and triggering cell death	Human(Homo sapiens)[9606]	NCBITaxon:9606	Huh7.5 cells	na	EFO:0005704	na	na	Trypsin/P	MS:1001313	2	10	0.02	10 ppm	0.02Da	Oxidation (methionine)	35#M	Carbamidomethylation (cysteine)	4#C	na	na	na	na	na	This article shows that GL22 signi?cantly inhibits the growth of the liver cancer cell line Huh7.5 in vitro and of Huh7.5-derived tumor xenografts in vivo.	Compound GL22, Ganoderma mushrooms	search parameter setting were obtained from PRIDE dataProcessingProtocol section	no	yes	yes	no	no	no	no
PXD006672	28816646	Chronic Cigarette Smoke Mediated Global Changes in Lung Mucoepidermoid Cells: A Phosphoproteomic Analysis	Human (Homo sapiens)[9606]	NCBITaxon:9606	Human lung mucoepidermoid carcinoma cell line NCI-H292	na	CLO:0008080	SILAC	MS:1002611	Trypsin	MS:1001251	2	20	0.2	20 ppm	0.2Da	Phosphorylation (serine, threonine, tyrosine), SILAC labels (13C6-Lysine, 13C6-Arginine)	21#S,21#T,21#Y,188#K,188#R	Oxidation (methionine), Carbamidomethylation (cysteine)	35#M,4#C	na	na	LTQ-Orbitrap Velos mass spectrometer	MS:1000449	HCD	We identi?ed the hyperphosphorylation of 493 sites, which corresponds to 341 proteins and 195 hypophosphorylated sites, mapping to 142 proteins upon smoke exposure (2.0-fold change).	phosphoproteomics, cigarette smoke, biomarkers, postgenomics biotechnology, lung cancer	na	no	yes	no	no	no	no	no
PXD006673	29741735	Widespread epigenomic, transcriptomic andproteomic differences between hip osteophytic andarticular chondrocytes in osteoarthritis	Human(Homo sapiens)[9606]	NCBITaxon:9606	Cartilage tissue	BTO:0000206	na	TMT-10plex	MS:PRIDE:0000314	trypsin	MS:1001251	2	20	0.5	20 ppm	0.5Da	oxidation(Methionine),Deamidation(asparagine,glutamine)	35#M,7#N,7#Q	TMT6plex (N-termimal),Carbamidomethylation(Cysteine,lysine)	737#N-term,4#C,4#K	Shotgun proteomics	PRIDE:0000429	Orbitrap Fusion Tribrid MS	MS:1002835	CID	To identify molecular differences between chondrocytes from osteophytic and articular cartilage tissue from OA patients	chondrocyte, osteophyte, epigenomics, transcriptomics, proteomics, genomics, Rheumatology key	search pameter setting were obtained from PRIDE data processing protocol seaction.	yes	yes	yes	no	no	no	no
PXD006687	29176938	A Proteomic Approach to Understanding the Pathogenesis of Idiopathic Macular Hole Formation	Human(Homo sapiens)[9606]	NCBITaxon:9606	retinal tissue (Vitreous samples)	na	na	na	na	trypsin	MS:1001251	2	50	0.10	50 ppm	0.10Da	Deamidation (asparagine,glutamine),oxidation (methionine), acetylation (n-terminal),carbamylation (lysine),phosphorylation (serine,threonine,tyrosine)	7#N,7#Q,35#M,1#N-term,5#K,21#S,21#T,21#Y	Carbamidomethylation (Cysteine)	4#C	na	na	EASY-Spray source coupled with an Orbitrap Elite (Thermo Scientific) massspectrometer.	MS:1002416	CID	A proteomic approach revealed proteins and biological pathways that may be involved in the pathogenesis of IMH and could be targeted for future studies.	Eye; Idiopathic macular hole; Proteomics; Retina; Vitreous.	using search engines of Mascot and X!Tandem	no	yes	no	no	no	no	no
PXD006698	28675297	A Human Tyrosine Phosphatase Interactome Mapped by ProteomicProfiling	Human (Homo sapiens) [9606]	NCBITaxon:9606	HEK293T, HeLa cells	na	CLO:0003684,BTO:0002181	na	na	in-geltrypsin	MS:1001251	na	na	na	na	na	na	na	na	na	TAP-MS, shotgun proteomics	MI:0676l, PRIDE:0000429	LTQ Orbitrap Velos Pro ion-trap mass spectrometer	MS:1001742	na	In this article, we present an interaction network of 81 humantyrosine phosphatases built on 1884 high-confidence interactions of which 85% are unreported.Our analysis has linked several phosphatases with new cellular processes and unveiled proteininteractions genetically linked to various human diseases including cancer. We validated thefunctional importance of an identified interaction network …	phosphatase, interactome, multiprotein complexes, PTPN5, Mob1a, cytokinesis	na	no	yes	no	no	no	no	no
PXD006769	30464169	Integrated Mapping of Pharmacokinetics and Pharmacodynamics in a Patient-Derived Xenograft Model of Glioblastoma	Human(Homo sapiens)[9606]	NCBITaxon:9606	mouse brain tissue	NCIT:C22606	na	TMT-10plex	PRIDE:0000314	trypsin	MS:1001303	na	10	15	10 ppm	15 mmu	Oxidation(methionine),phosphorylation (serine, threonine,tyrosine)	35#M,21#S,21#T,21#Y	carbamidomethylation (Cysteine),TMT-labeled (lysine,N-terminal protein)	4#C,739#K,739#N-term	na	na	TSQ Quantum triple quadrupole mass spectrometer	MS:1002801	na	the studyreported herein provides a ?failure analysis? to understand thelimitations of erlotinib tumor distribution and to describe amulti-modal platform that can be used to evaluate and nominatethe most promising drugs for evaluation in clinical testing forGBM.	Glioblastoma (GBM),tumor,MALDI MSI, phosphorylation	na	no	yes	no	no	no	no	no
PXD006788	30127373	STAT3 associates with vacuolar H+-ATPase and regulatescytosolic and lysosomal pH	Human(Homo sapiens)[9606]	NCBITaxon:9606	Human A549 non-small cell lung carcinoma, HeLa cervix carcinoma, Skov3 ovarian carcinoma, Human pancreatic duct epithelial cells (H6C7), Human immortalized mammary fibroblasts (HMF3)	na	CLO:0001601,DOID:3908,CLO:0003684,CL:0000068,BTO:0001430	label free	MS:1002038	trypsin	MS:1001251	na	na	na	na	na	Acetylation(N-terminal), Oxidation (methionine)	1#N-term,35#M	carbamidomethylation(cysteine)	4#C	na	na	EASY nanoLC coupled to a Q Exactive Plus Hybrid Quadrupole-Orbitrap Mass Spectrometer.	MS:1001911	HCD (higher energy collisional dissociation)	In this article, we identify signal transducer and activator of transcription-3 (STAT3) as a keyfactor in the preservation of alkaline cytosol	tandem ms, CRISPR, Cas9, STAT 3	MaxQuant software was applied for protein identification and label-free quantification,All experiments were performed a minimum of three times and results are expressed as mean ñ SD from ? 3 independent experiments.	no	yes	na	no	no	no	no
PXD006847	29491378	nanodroplet Processing Platform for Deep and Quantitative Proteome Profiling of 10-100 Mammalian Cells	Human(Homo sapiens)[9606]	NCBITaxon:9606	HeLa cells	na	EFO:0001185	SILAC	MS:1002611	trypsin/Lys-C	MS:1001251,MS:1001309	2	10	na	10 ppm	na	oxidation (methionine),acetylation(N-terminal protein)	35#M,1#N-term(Protein)	carbamidomethylation (Cysteine)	4#C	na	na	Orbitrap Fusion Lumos Tribrid MS	MS:1002732	HCD	we report the development of a nanoPOTS (nanodroplet processing in one pot for trace samples) platform for small cell population proteomics analysis. nanoPOTS enhances the efficiency and recovery of sample processing by downscaling processing volumes to <200 nL to minimize surface losses.	Maxquant, nanoPOTS (nanodroplet processing in one pot for trace samples)	na	no	yes	no	no	no	no	no
PXD006856	29581253	naA80 is actin?s N-terminal acetyltransferase and regulates cytoskeleton assembly and cell motility	Human (Homo sapiens)[9606]	NCBITaxon:9606	HAP1	na	EFO:0007598	isotope labelling	PRIDE:0000310	Semi-ArgC/P	MS:1001303	1	10	0.02	10 ppm	20 mDa	Oxidation (methionine)	35#M	Heavy acetylation (13C2D3, lysine), carbamidomethylation (cysteine)	56#K,4#C	na	na	Ultimate 3000 RSLCnano system connected to Q Exactive HF mass spectrometer	MS:1002634	na	The results demonstrate naA80?s role as actin ?s naT and reveal a crucial role for actin Nt-acetylation in the control of cytoskeleton structure and dynamics.	na	na	no	yes	no	no	no	no	no
PXD006863	29208752	Effects of Alanyl-Glutamine Treatment on the Peritoneal Dialysis Effluent Proteome Reveal Pathomechanism-Associated Molecular Signatures	Human(Homo sapiens)[9606]	NCBITaxon:9606	Peritoneal dialysis fluid	BTO:0003616	na	TMT labeling	PRIDE:0000314	Trypsin	MS:1001251	1	10	0.6	10 ppm	0.6 Da	Oxidation (methionine)	35#M	Carbamidomethylation (cysteine), TMT 6-plex (lysine, N-terminal)	4#C,737#K,737#N-term	na	na	hybrid linear trap quadrupole (LTQ) Orbitrap Velos mass spectrometer	MS:1000449	HCD	Our study represents the first application of the PDE proteome in a randomized controlled prospective clinical trial of PD. This novel proteomic workflow allowed detection of low abundance biomarkers to define pathomechanism-associated molecular signatures in PD and their alterations by a novel therapeutic intervention	Peritoneal Dialysis Effluent Proteome,	na	no	yes	no	no	no	no	no
PXD006998	30535373	Human leukemia cells (HL-60) proteomic and biological signatures underpinning cryo-damage are differentially modulated by novel cryo-additives	Human(Homo sapiens)[9606]	NCBITaxon:9606	leukemia cells (HL-60)	na	CLO:0003775	Label-Free quantification	MS:1002038	Trypsin	MS:1001251	2	na	na	na	na	Oxidation(methionine)	35#M	Carbamidomethylation (Cysteine)	4#C	Bottom-up	PRIDE:0000428	2D-RP/RP Acquity UPLC M-Class System coupled to Synapt G2-Si HDMS mass spectrometer.	MS:1002726	na	The current study focuses on establishing and modulating the proteomic and the corresponding biological profiles associated with the cryo-injury of Human(Homo sapiens)[9606] leukemia (HL-60) cells cryopreserved in DMSO alone or DMSO+/- novel CPAs (e.g., nigerose [Nig] or salidroside [Sal]).	cryopreservation, oxidative stress, dimethylsulfoxide, nigerose, salidroside	In this we used Progenesis QI for Proteomics software package with Apex3D, Peptide3D, and Ion Accounting informatics.	no	yes	no	no	no	no	no
PXD007081	30038331	Urine-derived cells: a promising diagnostic tool in Fabry disease patients	Human (Homo sapiens) [9606]	NCBITaxon:9606	urine-derived cells , human podocytes	na	UBERON:0001088,CLO:0037340	LFQ(label-free quantitation)	MS:1002038	trypsin	MS:1001251	na	na	na	na	na	na	na	na	na	na	na	quadrupole-orbitrap based QExactive Plus mass spectrometer	MS:1002634	na	In this article, we explore the utility of urine-derived primary cells of Fabry disease patients. Viable cells were isolated and cultured from fresh urine void. The obtained cell culture, modeling the renal epithelium, is characterized by patient-specifc information. We demonstrate that this non-invasive source of patient cells provides an adequate cellular in vivo model as cells exhibit decrease…	PUC, human, Favry's disease	We used MaxQuant for analysis ; this article has multiple projects	PXD007080	yes	no	no	no	no	no
PXD007083	30116025	Proteomic phenotyping of metastatic melanoma reveals putative signatures of MEK inhibitor response and prognosis	Human (Homo sapiens)[9606]	NCBITaxon:9605	Stage III early passage melanoma cell lines C002, C037, C045, C052, C054, C078, C084, and C096	na	na	na	na	trypsin	MS:1001251	na	na	na	na	na	na	na	carbamidometheylation (cysteine)	4#C	na	na	Triple TOF 5600 mass spectrometer (SCIEX)	MS:1000932	na	This study investigated the utility of protein expression phenotyping to provide an integrated assessment of gene expression programs in BRAF/NRAS melanoma which would be useful for prognosis and may predict response to MEK inhibition.	multiple project PXD002725, PXD007083	na	PXD002725,PXD007083	yes	no	no	no	no	no
PXD007103	29961565	Endogenous Cell Type-Specific DISC1 Interactomes Reveal Protein Networks Associated to Neurodevelopmental Disorders	Human (Homo sapiens) [9606]	NCBITaxon:9606	lymphoblastoid cell line	na	EFO:0005292	na	na	trypsin	MS:1001251	2	10	0.8	10 ppm	0.8 Da	oxidation (methionine)	35#M	carboxyamidation (cysteine)	4#C	bottom up	PRIDE:0000428	LTQ-FT	MS:1000448	na	We were able to determine 150 novel cell-type specific proteins present in DISC1 endogenous interactomes. The DISC1 interactomes can be clustered into several sub-complexes that suggest novel DISC1 cell-specific functions. In addition, the DISC1 interactome in iPSC derived neural progenitor cells associates in a connected network containing proteins found to harbor de-novo mutations in patients a…	neural development, DISC1, proteomics, CRISPR, schizophrenia, neurodevelopmental disorders	na	no	yes	no	no	no	no	no
PXD007123	29980616	Decreased naD Activates STAT3 and Integrin Pathways to Drive Epithelial-Mesenchymal Transition	Human(Homo sapiens)[9606]	NCBITaxon:9606	Lung cancer cell line-A549, human liver cancer cell-HepG2, human embryonic kidney cell line-293T	na	BTO:0000018,BTO:0000599,EFO:0001082	ISOTOPE LABELLING	PRIDE:0000310	Trypsin	MS:1001251	2	20	0.02	20 ppm	20mmu	Oxidation(methionine), 13C(6)15N(2)(lysine), 13C(6) (arginine), deamidation(asparagine, glutamine), Phosphorylation(serine,thronine, tyrosine)	35#M,259#K,188#R,7#N,7#Q,21#S,21#T,21#Y	Carbamidomethylation (cysteine)	4#C	na	na	Thermo Orbitrap Fusion Lumos mass spectrometer	MS:1002732	HCD	In the present study, cellular naD levels were decreased by overexpression of CD38, a naD hydrolase, or by treating cells with FK866, an inhibitor of nicotinamide phosphoribosyltransferase (naMPT).	epithelial to mesenchymal transition (EMT), GraphPad Prism 5.0 software	na	PXD010284,PXD010286,PXD009916,PXD009917	yes	no	no	no	no	no
PXD007130	30057262	Recapitulation of Human Neural Microenvironment Signatures in iPSC-Derived NPC 3D Differentiation	Human(Homo sapiens)[9606]	NCBITaxon:9606	iPSCs (Royan iPSC clone 1 [R1-hiPSC1], clone 4 [R1-hiPSC4]) from dermal fibroblasts.	BTO:0004419	na	na	na	Trypsin	MS:1001251	na	na	na	na	na	na	na	na	na	na	na	nanoLC-MS using TripleTOF 6600	MS:1002533	Rolling Collision Energy.	Here, we employed neurospheroids to address microenvironment remodeling during neural differentiation of Human(Homo sapiens)[9606] stem cells, without the confounding effects of exogenous matrices.	3D culture, ECM, hiPSC, microenvironment, neural cell models, neural differentiation, neural progenitors, neurospheroids, proteomics, transcriptomics	Pdf unmarked.	no	yes	no	no	no	no	no
PXD007134	29158831	Identification and Validation of a Salivary Protein Panel to Detect Heart Failure Early	Human (Homo sapiens) [9606]	NCBITaxon:9606	saliva	BTO:0001202	na	na	na	trypsin	MS:1001251	na	na	na	na	na	na	na	carbamidomethyl(cysteine)	4#C	SWATH-MS	PRIDE:0000447	TripleTof 5600	MS:1000932	na	Analysis of salivary proteome using SWATH-MS revealed novel HF-specific protein candidates yielding high diagnostic performance. A multi-centre longitudinal clinical trial will be the next step before clinical implementation of this panel.	HF, DTT SWATH-MS	na	no	yes	no	no	no	no	no
PXD007234	30036086	Menstrual fluid factors facilitate tissue repair: identification and functional action in endometrial and skin repair	Human(Homo sapiens)[9606]	NCBITaxon:9606	Menstrual fluid	NCIT:C78740	na	Label-free quantification	MS:1002038	Trypsin	MS:1001251	4	4.5	0.02	4.5 ppm	20ppm	Acetylation (protein N-terminal), Oxidation (methionine) Pyroglutamate ( N-terminal peptide, Glutamate, Glutamine)	1#N-term(Protein),35#M,28#N-term(Peptide),28#L,28#Q	carbamidomethylation (cysteine)	4#C	na	na	nanoAcquity system coupled to Q-Exactive mass spectrometer with nano electrospray ion source.	MS:1001911	HCD	Proteomic analysis of MF identified a large number of proteins: migration inhibitory factor, neutrophil gelatinase?associated lipocalin, follistatin like-1, chemokineligand-20,andsecretoryleukocyteproteaseinhibitorwereselectedforfurtherinvestigation.Functionally, they promote repair of endometrial and keratinocyte wounds by promoting migration.	migration, menstruation, proteomics, Enrichment of low-abundance proteins	na	no	yes	no	no	no	no	no
PXD007543	29032073	A Compendium of Co-regulated Protein Complexesin Breast Cancer Reveals Collateral Loss Events	Human (Homo sapiens) [9606]	NCBITaxon:9606	MCF7	na	CLO:0007606	label free	MS:1002038	trypsin,lysC	MS:1001251,MS:1001309	2	20	na	20 ppm	na	oxidation (methionine),acetylation (protein N-terminal)	35#M,1#N-term(Protein)	carbamidomethylation (cysteine)	4#C	na	na	Q Excative mass spectrometer connected to a Dionex Ultimate 3000 chromatography system incorporating an autosampler	MS:1001911	na	In this article, we have identified a set of 285high-confidence protein complexes whose subunitshave highly correlated protein abundance acrosstumor samples	CRISPR-Cas9	mass spectra were analyzed using Max Quant software.	no	yes	no	no	no	no	no
PXD007575	28988947	Multiplexed Thiol Reactivity Profiling for Target Discovery of Electrophilic natural Products	Human(Homo sapiens)[9606]	NCBITaxon:9606	HeLa ,U2OS cells	na	EFO:0001185,EFO:0002869	8-plex iTRAQ-labeled	PRIDE:0000313	trypsin	MS:1001251	3	10	0.01	10 ppm	10ppm	oxidation(methionine),iodoacetamide alkylation,IPM-tri-triazohexanoic acid	35#M,4#C	8-plex iTRAQ tags(N-terminal,lysine)	730#N-term,730#K	na	na	Q Exactive plus (Thermo Fisher Scientific) operated with an Easy-nLC1000 system	MS:1002634	HCD	we describe a new chemoproteomic strategy, termed multiplexed thiol reactivity profiling (MTRP)	chemoproteomics,cysteine,electrophile,gambogic acid,Itraq,lactone,mass spectrometry,natural products.	na	no	yes	no	no	no	no	no
PXD007592	29541007	Proteomics-based Insights Into Mitogen-Activated Protein Kinase Inhibitor Resistance of Cerebral Melanoma Metastases	Human(Homo sapiens)[9606]	NCBITaxon:9606	Melanoma cells	na	EFO:0000756	label-free quantitation (LFQ)	MS:1002038	Promega Trypsin/Lys-C Mix	MS:1001313,MS:1001309	2	5	0.02	5 ppm	20ppm	Oxidation (methionine), Acetylation (N-terminal protein)	35#M,1#N-term(Protein)	Carbamidomethylation (Cysteine)	4#C	Shotgun proteomics	PRIDE:0000429	QExactive HF orbitrap mass spectrometer,equipped with a nanospray ion source coupled to the nano HPLC system	MS:1002523	HCD	we confirmed known extra-cerebral resistance mechanisms in the cerebral metastases and further discovered possible brain specific mechanisms of drug efflux, which might serve as treatment targets or as predictive markers for these kinds of metastasis.	BRAF mutation; Cerebral melanoma metastases; Drug resistance; MAP kinase inhibitor; Melanoma; Proteomics.	na	no	yes	no	no	no	yes	no
PXD007675	29955062	Molecular basis of Tousled-Like Kinase 2 activation	Human(Homo sapiens)[9606], E.coli (escherichia coli) [562]	NCBITaxon:9606,NCBITaxon:562	HEK293	na	BTO:0000007	na	na	trypsin	MS:1001251	na	na	na	na	na	acetylation (N-terminal protein), oxidation (methionine), gln->pyroGlu, phosphorylation (serine,threonine,tyrosine), deamidation (asparagine, glutamine)	1#N-term,35#M,28#Q,21#S,21#T,21#Y,7#N,7#Q	carbamidomethylation(cysteine)	4#C	shotgun proteomics	PRIDE:0000429	a nanoscale UHPLC system connected to a Q Exactive HF mass spectrometer through a nanoelectrospray ion source	MS:1002523	HCD (higher energy collisional dissociation)	In this article, we report a detailed molecular characterization of thecrystal structure of the kinase domain of TLK2 in complex withATP?S, thus providing insight into its structural properties andmode of activation	protein-protein interaction, Tousled-Like Kinase 2 (TLK2), post-translational modification,	All raw LC-MS/MS data files were analyzed using the MaxQuant software version ; Data were searched against a target/decoy version of the complete human UniProt database ; the ECOLI database was employed in the search to identify potential copurifying host cell proteins ; this article has multiple projects	PXD009095	yes	no	no	no	no	no
PXD007726	29721084	A novel USP9X substrate TTK contributes to tumorigenesis in non-small-cell lung cancer	Human(Homo sapiens)[9606]	NCBITaxon:9606	A549, 293T, HeLa, NCI-H3122, NCI-H125,NCI-H1975 and 293FT cells	na	EFO:0001086,EFO:0001082,EFO:0001185,CLO:0037033,EFO:0003116,EFO:0002271,	TMT 6-plex	PRIDE:0000314	trypsin/P	MS:1001313	2	na	na	na	na	oxidation (Methioine)	35#M	Carbamidomethylation (Cysteine)	4#C	shotgun proteomics	PRIDE:0000429	Orbitrap Fusion Lumos mass spectrometer with an ancillary nanoLC	MS:1002732	HCD	our data demonstrated that the USP9X-TTK axis may play a critical role in NSCLC, and could be considered as a potential therapeutic target.	USP9X,non-small-cell lung cancer (NSCLC),TTK,deubiquitination	search pameter settings were obtained from PRIDE data processing protocol section	no	yes	yes	no	no	no	no
PXD007740	29970458	A System-wide Approach to MonitorResponses to Synergistic BRAF and EGFRInhibition in Colorectal Cancer Cells	Human (Homo sapiens) [9606]	NCBITaxon:9606	Colorectal tumor cell lines WiDr and WiDr PTPN11 KO	na	CLO:0009600	label-free quantification	MS:1002038	trypsin	MS:1001251	2	4.5	0.02	4.5 ppm	20ppm	oxidation(methionine),acetylation(protein N-terminal),phosphorylation(serine,threonine,tyrosine)	35#M,1#N-term(Protein),21#S,21#T,21#Y	carbamidomethylation(cysteine)	4#C	phosphoproteomics mass spectrometry	PRIDE:0000587	an Agilent 1290 Infinity II LC system coupled to a Q-Exactive mass spectrometer	MS:1001911	HCD (higher energy collisional dissociation)	Here, we investigate molecular responses upon single and multi-target treatments, overtime, using BRAF(V600E) mutant colorectal cancer cellsas a model system.	proteomic, phospho-proteomics	na	no	yes	no	no	no	no	no
PXD007744	29752063	Proteomic Analyses of Human Regulatory T Cells Reveal Adaptations in Signaling Pathways That Protect Cellular Identity	Human(Homo sapiens)[9606]	NCBITaxon:9606	HEK293	na	EFO:0001184	label-free quantitation (LFQ)	MS:1002038	trypsin	MS:1001313	na	10	na	10 ppm	na	na	na	na	na	na	na	Orbitrap Fusion Tribrid MS	MS:1002835	HCD	our study revealed surface markers that identify FOXP3+CD4+T cells with distinct functional properties. Our findings suggest that adaptation in signaling pathways protect Treg cell identity and present a resource for further research into Treg cell biology.	FOXP3,NFAT,STAT4,proteomics,regulatory Tcells,signal transductio, transcription factors,transcriptomics.	multiple project	PDX007745,PDX007744,PXD005477	yes	no	no	no	no	no
PXD007809	29980615	Influenza A Virus Induces AutophagosomalTargeting of Ribosomal Proteins	Human (Homo sapiens) [9606]	NCBITaxon:9606	Adherent human A549, Calu-1, NCI-H1299	na	CLO:0001601,CLO:0002191,CLO:0007986	SILAC	MS:1002611	trypsin/p	MS:1001313	3	20	0.5	20 ppm	0.5Da	oxidation(methionine),acetylation(protein N-terminal)	35#M,1#N-term(Protein)	carbamidomethyl(cysteine)	4#C	AP-MS	PRIDE:0000431	LTQ orbitrap XL mass spectrometer , QExactive Plus mass spectrometer	MS:1000556, MS:1002634	na	We performed comprehensive expressionand organellar proteomics experiments to study the cel?lular consequences of influenza A virus infection usingthree human epithelial cell lines derived from human lungcarcinomas: A549, Calu-1 and NCI-H1299.	IAV, ABC, AP, FDR, GFP, MOI, ON, PAMP, PCP, PFU,RT, SEC, WB, WCL	this article has multiple projects	PXD007809,PXD009924	yes	no	no	no	no	no
PXD007890	29358341	Temporal Effects of Combined Birinapant and Paclitaxel on Pancreatic Cancer Cells Investigated via Large-Scale, Ion-CurrentBased Quantitative Proteomics (IonStar)	Human (Homo sapiens) [9606]	NCBITaxon:9606	human pancreatic cancer cell line	na	BTO:0000794	na	na	trypsin	MS:1001251	2	20	0.02	20 ppm	0.02 Da	oxidation (methionine), acetylation (N-terminal)	35#M,1#N-term	carbamidomethylation (cysteine)	4#C	na	na	An Orbitrap Fusion Lumos Mass Spectrometer	MS:1002732	HCD (higher collision induced dissociation)	we investigated molecular-level drug interaction mechanisms using comprehensive, reproducible, and well-controlled ion-current-based MS1 quantification (IonStar). By analyzing 40 biological samples in a single batch, we compared temporal proteomic responses of PDAC cells treated with birinapant and paclitaxel, alone and combined. Using stringent criteria (e.g. strict falsediscovery-rate (FDR) con…	Birinapant and Paclitaxel , Pancreatic Cancer Cells, (IonStar),	na	no	yes	no	no	no	no	no
PXD007898	29669735	CTGF/VEGFA-activated Fibroblasts Promote Tumor Migration Through Micro-environmental Modulation	Human(Homo sapiens)[9606],Bovine(Bos taurus)[9913]	NCBITaxon:9606,NCBITaxon:9913	Breast tumor cell line Hs578T, normal breast fibroblast Hs578Bst	na	CLO:0004009,CLO:0004008	Label-free quantification (LFQ)	MS:1002038	Trypsin	MS:1001251	2	4.5	0.02	4.5 ppm	20ppm	Oxidation(methionine), Acetylation(protein N-terminal), AHA substitution (methionine, secretomics), Phosphorylation (Serine, Threonine, Tyrosine)	35#M,1#N-term(Protein),21#S,21#T,21#Y	Carbamidomethylation (Cysteine)	4#C	Bottom-up	PRIDE:0000428	UHPLC 1290 system coupled to Orbitrap Q Exactive Plus mass spectrometer	MS:1002634	HCD	This project reveal a profound division-of-labor between normal and cancer cells under the directive of the latter, and allude to potential metastatic prevention through inhibiting local fibroblast activation	Tumor, secretomics, phosphoproteomics	MaxQuantversion1.5.3.30andthe Andromeda search engine were used. Phospho-enrichment was performed by Ti-IMAC STAGE tips	no	yes	no	no	no	no	no
PXD008014	29720545	Multifocal demyelinating motor neuropathy and hamartoma syndrome associated with a de novo PTEN mutation	Human(Homo sapiens)[9606]	NCBITaxon:9606	Fibroblasts	BTO:0000452	na	Label-Free quantification	MS:1002038	Trypsin	MS:1001251	2	10	0.5	10 ppm	0.5Da	Oxidation(methionine)	35#M,	Carbamidomethylation (Cysteine)	4#C	Shotgun Proteomics	PRIDE:0000429	na	na	na	We describe an ovel phenotype, PTEN-associated multifocal demyelinating motorneuropathy with askinhamartoma syndrome. A similar mechanism may potentially underlie other form sof Charcot-Marie-Tooth disease with involvement of the phosphatidylinositol pathway.	PTEN( phosphatase and tensin homolog ), multifocal demyelinating motor neuropathy	Search parameters settings were obtained from PRIDE dataProcessingProtocol section.	no	yes	yes	no	no	no	no
PXD008022	30123426	Spatial and temporal proteome dynamics of glioma cells during oncolytic adenovirus Delta-24-RGD infection	Human (Homo sapiens) [9606]	NCBITaxon:9606	U87 MG glioma cells (ATCC: HTB-14)	na	CLO:0009464	iTRAQ	MS:1002622	trypsin	MS:1001251	na	na	na	na	na	na	na	na	na	shotgun comparative proteomics analysis	PRIDE:0000429	triple TOF 5600	MS:1000932	na	we conducted a cell-wide study of cytosolic, nuclear, and secreted glioma proteomes throughout the early time course of Delta-24-RGD infection. In addition to the severe proteostasis impairment detected during the first hours post-infection (hpi), Delta-24-RGD induces a transient inhibition of signal transducer and activator of transcription 3 (STAT3), and transcription factor AP-1 (c-JUN) betwee…	adenovirus, Delta-24RGD infection, proteomics. glioma	this article has multiple projects	PXD008023	yes	no	no	no	no	no
PXD008033	30279501	Cell cycle-resolved chromatin proteomics reveals the extent of mitotic preservation of the genomic regulatory landscape	Human(Homo sapiens)[9606]	NCBITaxon:9606	T98G cells (origin humanglioblastoma multiforme)	na	CLO:0009258	TMT labeling	PRIDE:0000314	Trypsin	MS:1001251	2	10	0.6	10 ppm	0.6 Da	TMT6plex (lysine, peptide N-terminal), oxidation(Methionine), acetylation(protein terminal)	737#K,737#N-term,35#M,1#N-term(Protein)	Carbamidomethylation (cysteine)	4#C	na	na	Orbitrap	MS:1000449	CID	this work establishes an approach to study chromatin, provides a comprehensive catalog of chromatin changes during the cell cycle, and reveals the degree to which the genomic regulatory landscape is maintained through mitosis	chromatin-associated proteome, transcription factor	Search settings are added here for proteome discoverer searches	no	yes	no	no	no	no	no
PXD008131	30143613	The dual methyltransferase METTL13 targets N terminus and Lys55 of eEF1A and modulates codon-specific translation rates	Human(Homo sapiens)[9606]	NCBITaxon:9606	HAP-1 METTL13 KO cells	na	BTO:0003618	SILAC	MS:1002611	LysC,trypsin	MS:1001309,MS:1001251	na	na	na	na	na	Methylation(monolysine,dilysine,trilysine), Methylation(monoarginine, diarginine), Acetylation (N-terminal protein),Gln->pyroGlu (N-terminal)	34#K,36#K,37#K,36#R,34#R,1#N-term(Protein),28#Q(N-term)	na	na	na	na	Easy nlc 1200 system connected to HF mass spectrometer, Q Executive mass spectrometer	MS:1001911	HCD	we here show that human methyltransferase (MTase)-like protein 13 (METTL13) contains two distinct MTase domains targeting the N-terminus and Lys55 of eEF1A.	methylation,post-translation modification	accessible viaProteomeXchange with identifier	PXD008115,PXD008131,PXD009895,PXD009914	yes	no	no	no	yes	no
PXD008252	30228939	Nidogen-1 is a novel extracellular ligand for the NKp44 activating receptor	Human (Homo sapiens)[9606]	NCBITaxon:9606	HEK293T (human embryonic kidney), K562 (human erythroleukemia), Bw1547 (Bw, murine thymoma), SH-SY-5Y (human neuroblastoma), A172 (human glioblastoma), C-32 (human melanoma), A2774 (human ovarian adenocarcinoma), JEG-3 (human placental choriocarcinoma), A549 (human lung carcinoma)	na	EFO:0001184,EFO:0002067,BTO:0000791,BTO:0000793,CLO:0001560,BTO:0001882,CLO:0054345,CLO:0001601	Label- Free Quantification.	MS:1002038	na	na	na	na	na	na	na	Acetylation (Protein N-Terminal), Oxidation (Meothenine), Deamidation (Asparagine, Glutamine)	1#N-term(Protein),35#M,7#N,7#Q	Carbamidomethylation (Cysteine)	4#C	na	na	LTQ linear ion trap mass spectrometer coupled to a HPLC Surveyor	MS: 1000291	na	In this study, we provide evidence that NKp44 recognizes a novel extracellular ligand, namely the Nidogen-1 (NID1) protein (also known as Entactin). We show that the NKp44/NID1 interaction results in a reduced NKp44-mediated induction of cytokine release by NK cells.	NK cells, ELISA,	na	no	yes	no	no	no	no	no
PXD008310	29348145	FBXL13 Directs the Proteolysis of CEP192 to Regulate Centrosome Homeostasis and Cell Migration	Human(Homo sapiens)[9606]	NCBITaxon:9606	HEK293T	na	EFO:0001184	na	na	trypsin	NCIT:C84232	1	20	0.5	20 ppm	0.5Da	na	na	na	na	na	na	Orbitrap Velos mass spectrometer	MS:1001742	na	CEP192 is specifically targeted for proteasomal degradation by FBXL13	CEP192,FBXL13,F?box protein,centrosome,ubiquitin	na	no	yes	no	no	no	no	no
PXD008445	29961760	Patients with early-stage oropharyngeal cancer can beidentified with label-free serum proteomics	Human (Homo sapiens) [9606]	NCBITaxon:9606	oropharyngeal squamous cell carcinoma (OPSCC)	na	DOID:1749	label-free	MS:1002038	trypsin	MS:1001251	na	10	na	10 ppm	na	oxidation (methionine)	35#M	carbamidomethylation(cysteine)	4#C	MSE	PRIDE:0000451	na	na	na	We found a set of serum proteins distinguishing early-stage OPSCC from healthy individuals, and suggest a proteinset for further evaluation as a diagnostic biomarker panel for OPSCC.	protein-protein interaction, OPSCC	na	no	yes	no	no	no	no	no
PXD008454	29967110	Adaptive Resistance to EGFR-Targeted Therapy by Calcium Signaling in NSCLC Cells	Human (Homo sapiens)[9606]	NCBITaxon:9606	Cell lines NCI-H1975, NCI-H1650, HCC827 , PC9	na	CLO:0008035,CLO:0008007,CLO:0003659,EFO:0002847	silac	MS:1002611	Trypsin	MS:1001251	2	20	na	20 ppm	na	Oxidation (Methionine) , Phosphorylation (serine, threonine, tyrosine)	35#M,21#S,21#T,21#Y	Carbamidomethylation (Cysteine)	4#C	Phosphopeptide enrichment	PRIDE:0000587	Agilent 1290 LC system coupled to an Orbitrap Q-Exactive HF	MS:1002634	HCD	Here, we set out to identify the initial survival pathways that become activated in NSCLC cells harboring an EGFR-activating mutation, after treatment with the EGFR-speci?c inhibitor afatinib, and subsequently to inhibit these pathways to increase drug ef?cacy.	EGFR; adaptive resistance; Non-small lung Cancer; Tyrosine Kinase Inhibitors; Calcium Signaling	na	no	yes	no	no	no	no	no
PXD008570	30410026	HLA-B57 micropolymorphism defines thesequence and conformational breadth of theimmunopeptidome	Human (Homo sapiens) [9606]	NCBITaxon:9606	B-LCLs (lymphoblastoid B cell lines): C1R.B*57:01, C1R.B*57:03 and C1R.B*58:01 derived from the C1R cell line	na	BTO:0002062,BTO:0003699	isotope labelled	PRIDE:0000310	na	na	na	na	na	na	na	na	na	na	na	na	na	na	na	na	Here we explore the impact of micropolymorphismon peptide antigen presentation by three closely related HLA molecules, HLA-B*57:01, HLA?B*57:03 and HLA-B*58:01, that are differentially associated with the HIV elite controllerphenotype and adverse drug reactions. For each allotype, we mine HLA ligand data setsderived from the same parental cell proteome to define qualitative differences in peptide…	HLA-B*57:01, Immunopeptidome, MHC, LC-MSMS	this article has multiple projects	PXD008570,PXD008571,PXD008572,PXD009850	yes	no	no	no	no	no
PXD008581	29467285	Angiogenic Patterning by STEEL, an Endothelial-Enriched Long Noncoding Rna	Human(Homo sapiens)[9606]	NCBITaxon:9606	Human umbilical vein ECs (HUVECs), human dermal microvascular ECs (HMVECs), human aortic smooth muscle cells (HASMCs), hepatocytes, dermal fibroblasts, epidermal keratinocytes	na	EFO:0002451, BTO:0005737, BTO:0004577,BTO:0000575,BTO:0004419,BTO:0000667	carboxyfluorescein succinimidyl ester (CFSE) labeling	ECO:0001022	trypsin	MS:1001251	na	10	20	10 ppm	0.020Da	Deamidation(asparagine,glutamine),oxidation(methionine),phosphorylation(serine, threonine,tyrosine)	7#N,7#Q,35#M,21#S,21#T,21#Y	carbamidomethylation (Cysteine)	4#C	na	na	Q-Exactive hybrid mass spectrometer	MS:1002877	na	we report the existence of a set of EC-enriched lncRnas and define a role forspliced-transcriptendothelial-enriched lncRna (STEEL) in angiogenic potential, macrovascular/microvascular identity, and shear stress responsiveness	angiogenesis,chromatin,endothelium,hemodynamics,long noncoding Rna.	search parameter are from supplement material	no	yes	no	no	no	no	no
PXD008584	30326427	Synthetic Circular Rna Functions as a miR-21Sponge to Suppress Gastric CarcinomaCell Proliferation	Human (Homo sapiens) [9606]	NCBITaxon:9606	GC cell lines- NCI-N87, KATOIII, AGS, MKN28, human immortalized normal gastric epithelial cell line HFE145	na	CLO:0008129,EFO:0002217,EFO:0002109,EFO:0002831,CLO:0000563	TMT	MS:1002615	na	na	na	na	na	na	na	na	na	na	na	na	na	na	na	na	We hypothesized that synthetic circRna sponges could achieve therapeutic loss-of-function targeted against specific miRs. Linear Rna molecules containing miR-21 binding sites were transcribed in vitro; after dephosphorylation and phosphorylation, circularization was achieved using 50 -30 end-ligation by T4 Rna ligase 1. circRna stability was assessed using Rnase R and fetal bovine serum. Competit…	synthetic circular Rna, microRna sponge, microRna loss-of-function, gastric carcinoma, molecular therapy	na	no	yes	no	no	no	no	no
PXD008723	29719595	Proteomic alterations in early stage cervical cancer	Human (Homo sapiens) [9606]	NCBITaxon:9606	cervical tissue	NCIT:C12844	na	na	na	trypsin	MS:1001251	2	10	0.50	10 ppm	0.50 Da	oxidation (methionine)	35#M	carbamidomethylation (cysteine)	4#C	shotgun proteomics	PRIDE:0000429	Orbitrap Fusion mass spectrometer	MS:1002416	CID (collision induced dissociation)	Laser capture microdissection (LCM) allows the capture of cell types or welldefined structures in tissue. We compared in a semi-quantitative way the proteomes from an equivalent of 8,000 tumor cells from patients with squamous cell cervical cancer (SCC, n = 22) with healthy epithelial and stromal cells obtained from normal cervical tissue (n = 13). Proteins were enzymatically digested into peptid…	LCM, cervical cancer, biomarker, PRM, proteomics	Data were analyzed by three analysis approaches tO find proteins which were highly discriminativ (?all-or nothing?method, Bonferroni and a third less restrictive method Benjamini-Hochberg). In the most stringent?all-or-nothing? analysis, we searched for proteins being present in the early stage cervical cancer group (it was allowed that these proteins are presented in late stage cervical cancer a…	no	yes	no	no	no	no	no
PXD008788	30141943	Determining Allele-Specific Protein Expression (ASPE) Using a Novel QconCAT-Based Proteomics Method	Human(Homo sapiens)[9606]	NCBITaxon:9606	liver tissues	BTO:0000759	na	Isotope-labelled	PRIDE:0000310	Trypsin	MS:1001251	na	na	na	na	na	na	na	na	na	na	na	na	na	na	we developed a novel targeted proteomics method for quantification of allele-specific protein expression (ASPE) based on scheduled parallel reaction monitoring (PRM) with a heavy stable isotope-labeled quantitative concatamer (QconCAT) internal protein standard	allele-specific protein expression (ASPE); quantitative concatamer (QconCAT); UGT2B15; parallel reaction monitoring (PRM)	na	no	yes	no	no	no	no	no
PXD008821	30072576	Co-regulatory networks of human serum proteins link genetics to disease	Human(Homo sapiens)[9606]	NCBITaxon:9606	Blood	BTO:0000089	na	na	na	trypsin	MS:1001251	2	15	0.8	15 ppm	0.8Da	Oxidation (methionine), Phosphorylation (serine, threonine, tyrosine)	35#M,21#S,21#T,21#Y	Carbamidomethylation (cysteine)	4#C	na	na	LTQ-Orbitrap-Velos, Q Exactive Plus mass spectrometer	MS:1000449, MS:1002634	na	Protein circulating in the blood are criticle for age related diseases processes however the serum proteome has remained largely unexplored. Here we covered Slow-Off rate Modified Aptamer (SOM Amer) based technology has emerged as a proteomic profiling platform with high sample throughput and sensitivity of detection.	Blood serum, blood plasma, cell lysate, conditioned media, aptamer, SOMAmer	multiple project: PXD008819-PXD008823	PXD008819,PXD008820,PXD008821,PXD008822,PXD008823	yes	no	no	no	no	no
PXD008870	30100563	Intestinal Metaproteomics Reveals Host-Microbiota Interactions in Subjects at Risk for Type 1 Diabetes	Human(Homo sapiens)[9606]	NCBITaxon:9606	Stool Sample	na	na	na	na	Trypsin	MS:1001251	2	na	na	na	na	Oxidation (methionine), Deamidation (asparagine)	35#M,7#N	Carbamidomethylation (cysteine)	4#C	na	na	Q Exactive mass spectrometer	MS:1001911	na	We investigated the functional interactions between the microbiota and the host associated with type 1 diabetes disease risk.	cross-sectional analysis, type 1 diabetes.	na	no	yes	no	no	no	no	no
PXD008896	29511296	Characterization of gene regulation and protein interaction networks for Matrin 3 encoding mutations linked to amyotrophic lateral sclerosis and myopathy.	Human (Homo sapiens) [9606], mouse(mus musculus)	NCBITaxon:9606,NCBITaxon:10090	HeLa cells, H4 neuroglioma cells, HEK293 cells, C2C12 myoblast cells	na	CLO:0003684,BTO:0000007,CLO:0003599,CLO:0009756	label-free spectra counting	MS:1002038	trypsin	MS:1001251	na	na	na	na	na	na	na	na	na	na	na	Q-Exactive mass spectrometer	MS:1001911	na	In this article, To understand how mutations in Matrin 3 (MATR3) cause amyotrophic lateral sclerosis (ALS) and distal myopathy, we used transcriptome and interactome analysis, coupled with microscopy.We identifed ~123 proteins that bound MATR3, with proteins associated with stress granules and Rna processing/splicing being prominent.The intra-nuclear localization and interaction network of MATR3 …	TREX, FACS, YEP	na	no	yes	no	no	no	no	no
PXD008925	30001349	Radio-sensitizing effects of VE-821 andbeyond: Distinct phosphoproteomic andmetabolomic changes after ATR inhibition inirradiated MOLT-4 cellsRadio-sensitizing effects of VE-821 and beyond: Distinct phosphoproteomic and metabolomic changes after ATR inhibition in irradiated MOLT-4 cells	Human(Homo sapiens)[9606]	NCBITaxon:9606	MOLT-4 cells	na	CLO:0007825	SILAC	MS:1002611	Trypsin	MS:1001251	2	10	0.02	10 ppm	20ppm	Oxidation (methionine),Acetylation (protein N-terminal), Phosphorylation (serine, threonine, tyrosine)	35#M,1#N-term(Protein),21#S,21#T,21#Y	Carbamidomethylation (cysteine)	4#C	Phosphopeptide enrichment	PRIDE:0000587	nanospray Flex ion source with Q Exactive mass spectrometer	MS:1001911	HCD	We aimed to elucidate molecular mechanisms underlying radiosensitization of T-lymphocyte leukemic MOLT-4 cells by VE-821, a higly potent and specific inhibitor of ATR.	Phosphopeptide enrichment	na	no	yes	no	no	no	no	no
PXD008980	30252905	Time-resolved proteomics of adenovirus infected cells	Human (Homo sapiens) [9606], Human adenovirus 2 (Human adenovirus C serotype 2 (HAdV-2)) [10515]	NCBITaxon:9606,NCBITaxon:10515	Lung fibroblast (IMR-90)	BTO:0000764,BTO:0001229	na	SILAC labelling	MS:1002611	Trypsin	MS:1001251	2	4.5	0.02	4.5 ppm	20 ppm	Oxidation (methionine), Acetylation (protein N-terminal), Phosphorylation (Serine, Threonine, tyrosine)	35#M,1#N-term(Protein),21#S,21#T,21#Y	carbamidomethylation (cysteine)	4#C	Bottom-up	PRIDE:0000428	na	na	na	The results of this shows that specific aspects on how the host cell proteins, the final products in the genetic information flow, are influenced by Ad2 infection, which would be overlooked if only knowledge derived from mRna data is considered.	nanoLC-MS/MS, SDS-PAGE, swap-labelling experiment	na	no	yes	no	no	no	no	no
PXD008996	30054545	Deoxynivalenol induces structural alterations in epidermoid carcinoma cells A431 and impairs the response to biomechanical stimulation	Human (Homo sapiens) [9606]	NCBITaxon:9606	epidermoid carcinoma cell line A431	na	EFO:0006268	label free	MS:1002038	trypsin/Lys-C	MS:1001251,MS:1001309	2	50	0.1	50 ppm	100 mmu	oxidation (methionine), acetylation (protein N-terminal)	35#M,1#N-term(Protein)	carbamidomethylation (cysteine)	4#C	bottom up proteome analysis	PRIDE:0000428	Q Exactive orbitrap mass spectrometer	MS:1001911	na	Morphology together with the capability to respond to surrounding stimuli are key elements governing the spatial interaction of living cells with the environment. In this respect, biomechanical stimulation can trigger significant physiological cascades that can potentially modulate toxicity. Deoxynivalenol (DON, vomitoxin) is one of the most prevalent mycotoxins produced by Fusarium spp. and it w…	Deoxynivalenol (DON), carcinoma cells A431, Fusarium spp, biomechanical stimulation	na	no	yes	no	no	no	no	no
PXD009024	30076174	Non-muscle myosin II drives vesicle loss during human reticulocyte maturation	Human (Homo sapiens)[9606]	NCBITaxon:9606	Red Blood Cells	NCIT:C133280	na	TMT-labelling	PRIDE:0000314	Trypsin	MS:1001251	1	10	0.6	10 ppm	0.6Da	Oxidation (methionine)	35#M	Carbamidomethylation (cysteine), TMT mass tag (Peptide N-terminal and lysine)	4#C,739#K,739#N-term	na	na	Ultimate 3000 nano-LC system in line with an Orbitrap Fusion Tribrid mass spectrometer	MS:1002416	CID	We demonstrate the involvement of non-muscle myosin IIA in reticulocyte remodeling and propose a previously undescribed mechanism of shear stress-responsive vesicle clearance that is crucial for reticulocyte maturation.	na	search parameter setting were obtained from PRIDE dataProcessing protocol section	PXD009015,PXD009023,PXD009024.	yes	no	no	no	no	no
PXD009074	29599781	Extracellular Vesicle Subtypes Released From Activated or Apoptotic T-Lymphocytes Carry a Specific and Stimulus-Dependent Protein Cargo	Human(Homo sapiens)[9606]	NCBITaxon:9606	PBMCs(Peripheral blood mononuclear cells)	na	BTO:0001025	na	na	trypsin	NCIT:C84232	na	10	0.5	10 ppm	0.5Da	deamidation (asparagines, glutamine),acetylation( N-terminal ),phosphorylation (serine, Threonine)	7#N,7#Q,1#N-term(Protein),21#S,21#T	carbamidomethylation (Cysteine),oxidation(methionine)	4#C,35#M	Gel-based experiment	PRIDE:0000305	nanoHPLC system (nanoAcquity, Waters) coupled to an ESI LTQ Orbitrap mass spectrometer	MS:1002835	na	Apoptosis induction caused a massive release of LEVs, while activated T-cells released SEVs and LEVs in considerably lower amounts	apoptosis,exosomes,extracellular vesicle,microvesicles,stimulus-dependent release	search pameter setting were obtained from PRIDE data processing protocol seaction.	no	yes	yes	no	no	no	no
PXD009095	29955062	Molecular basis of Tousled-Like Kinase 2 activation	Human(Homo sapiens)[9606], E.coli (escherichia coli) [562]	NCBITaxon:9606,NCBITaxon:562	HEK293	na	BTO:0000007	na	na	trypsin	MS:1001251	na	na	na	na	na	acetylation (N-terminal protein), oxidation (methionine), gln->pyroGlu, phosphorylation (serine,threonine,tyrosine), deamidation (asparagine, glutamine)	1#N-term(Protein),35#M,28#Q,21#S,21#T,21#Y,7#N,7#Q	carbamidomethylation(cysteine)	4#C	shotgun proteomics	PRIDE:0000429	a nanoscale UHPLC system connected to a Q Exactive HF mass spectrometer through a nanoelectrospray ion source	MS:1002523	HCD (higher energy collisional dissociation)	In this article, we report a detailed molecular characterization of thecrystal structure of the kinase domain of TLK2 in complex withATP?S, thus providing insight into its structural properties andmode of activation	protein-protein interaction, Tousled-Like Kinase 2 (TLK2), post-translational modification,	All raw LC-MS/MS data files were analyzed using the MaxQuant software version ; Data were searched against a target/decoy version of the complete human UniProt database ; the ECOLI database was employed in the search to identify potential copurifying host cell proteins ; this article has multiple projects	PXD007675	yes	no	no	no	no	no
PXD009149	30114907	An Integrated, High-Throughput Strategy for Multiomic Systems Level Analysis	Human (Homo sapiens) [9606]	NCBITaxon:9606	Acute promyelocytic leukemia HL-60 cell, lung carcinoma A549 cells	na	EFO:0000224,DOID:3905,CLO:0001601	SILAC	MS:1002611	trypsin	MS:1001251	2	6	na	6 ppm	na	oxidation(methionine), phosphorylation	35#M,21#	carbamidomethylation	4#C	phosphopeptide enrichment	PRIDE:0000587	QExactive HF mass spectrometer (Thermo Scientific) in line with a Dionex Ultimate 3000 nanoLC and autosampler equipped with a nanoelectrospray ionization source.	MS:1002523	HCD	This study presents a simple high-throughput process that has been optimized to provide high quality specimens for metabolomics, proteomics, and transcriptomics from a common cell culture sample. The protocols that are presented were designed to be performed manually or using laboratory automation. Furthermore, we demonstrate that this approach can be accomplished efficiently: 16?24 samples can b…	mechanism of action; metabolomics; multiomics; proteomics; sample preparation; systems biology; transcriptomics; zinc	this article has multiple projects	PXD009149	yes	no	no	no	no	no
PXD009172	30510230	Olfactory cleft proteome does not refect olfactory performance in patients with idiopathic and postinfectious olfactory disorder: A pilot study	Human (Homo sapiens) [9606]	NCBITaxon:9606	human fluids(nasal mucus)	BTO:0004977	na	label-free quantification (LFQ)	MS:1002038	trypsin	MS:1001251	2	4.5	0.5	4.5 ppm	0.5Da	oxidation(methionine)	35#M	carbamidomethylation(cysteine)	4#C	shotgun proteomics	PRIDE:0000429	Thermo orbitrap velos pro mass spectrometer	MS:1001742	CID (collision induced dissociation)	In this article, we aimed to investigate proteomic changes as potential biomarkers in patients sufering from idiopathic and postinfectious olfactory disorders compared to healthy controls.	Human, LC-MS/MS, olfactory cleft, idiopathic and postinfectious olfactory disorder	The LC-MS data were analyzed for protein identification and quantification using MaxQuant	no	yes	no	no	no	no	no
PXD009196	30093357	Exercise-induced Molecular Mechanisms Promoting Glycogen Supercompensation in Human Skeletal Muscle	Human(Homo sapiens)[9606]	NCBITaxon:9606	Skeletal Muscles	BTO:0001103	na	na	na	na	na	na	na	na	na	na	na	na	na	na	na	na	na	na	HCD	Our study demonstrates that both AMPK and GS are key regulators of glycogen supercompensation following a single bout of glycogen-depleting exercise in skeletal muscle of both man and mouse.	AMP-activated protein kinase (AMPK); Exercise; Glucose uptake; Glycogen synthase (GS); Insulin action; TBC1 domain family member 4 (TBC1D4).	na	no	yes	no	no	no	no	no
PXD009203	30770125	Integrated Fourier Transform Infrared Imaging and Proteomics for Identification of a Candidate Histochemical Biomarker in Bladder Cancer	Human(Homo sapiens)[9606]	NCBITaxon:9606	urinary bladder	BTO:0001418	na	na	na	trypsin	NCIT:C84232	na	5	0.5	5 ppm	0.5Da	oxidation (methionine)	35#M	carboxyamidomethylation (Cysteine)	4#C	na	na	LTQ Orbitrap	MS:1000449	CID	Cystitis and invasive highgrade urothelial carcinoma sample were analysed	immunohistochemical biomarker	na	no	yes	no	no	no	no	no
PXD009216	29735996	C-BERST: Defining subnuclear proteomic landscapes at genomic elements with dCas9-APEX2	Human (Homo sapiens) [9606]	NCBITaxon:9606	Human U2OS cells	na	EFO:0002869	SILAC (stable isotope labeling using amino acid in a cell culture)	MS:1002611	trypsin	MS:1001251	2	10	0.05	10 ppm	0.05 Da	oxidation (methionine), gln-> pyroGlu(N-terminal), acetylation (N-terminal), biotinphenol (tyrosine)	35#M,28#Q(N-term),1#N-term,1830#Y	carbamidomethylation (cysteine)	4#C	bottom-up	PRIDE:0000428	Q Exactive hybrid mass spectrometer	MS:1002877	HCD (higher energy collisional dissociation)	we report that dCas9-APEX2 Biotinylation at genomic Elements by Restricted Spatial Tagging (C-BERST) allows the rapid, unbiased mapping of proteomes near defined genomic loci, as demonstrated for telomeres and centromeres. C-BERST enables the highthroughput identification of proteins associated with specific sequences, facilitating annotation of these factors and their roles in nuclear biology	MASCOT, dCas9-APEX2	na	no	yes	no	no	no	no	no
PXD009234	30140170	Global phosphoproteomic analysis identifies SRMS-regulated secondary signaling intermediates	Human(Homo sapiens)[9606]	NCBITaxon:9606	Embryonic kidney (HEK) 293 cells	BTO:0000007	na	Label-free quantitation	MS:1002038	Trypsin	MS:1001251	2	10	0.2	10 ppm	0.2Da	Carbamidomethylation (Cysteine), Phosphorylation (Serine, Threonine, Tyrosine), Deamidation (Asparagine, Glutamine), Acetylation (Lysine), Oxidation (Methionine)	4#C,21#S,21#T,21#Y,7#N,7#Q,56#K,35#M	na	na	Phosphopeptide enrichment	PRIDE:0000587	Q-Exactive Plus mass spectrometer connected to a waters nanoACQUITY UPLC system equipped with a Waters Symmetry C18 trap column ,nanoACQUITY UPLC column.	MS:1002634	HCD	Our phosphoproteomics analyses identified serine/threonine phosphorylation dynamics as important secondary events of the SRMS-regulated phosphoproteome with implications in the regulation of cellular and biological processes.	SRMS, PTK70, Src, BRK, FRK, PTK6, PTK5, Non-receptor tyrosine kinase, Phosphoproteomics, Mass spectrometry, Motif enrichment analyses	na	no	yes	no	no	no	no	no
PXD009251	30333727	Comparative Hippocampal SynapticProteomes of Rodents andPrimates: Differences inNeuroplasticity-Related Proteins	Human(Homo sapiens)[9606],Marmoset, Rat(Rattus norvegicus)[10116] , mouse (mus musculus)[10090]	NCBITaxon:9606,NCBITaxon:2301497,NCBITaxon:10116,NCBITaxon:10090	Hippocampal brain tissue	BTO:0004553	na	label free	MS:1002038	trypsin	MS:1001251	2	6	na	0.006 Da	na	oxidation (methionine), acetylation(N-terminal)	35#M,1#N-term(Protein)	betamethylthiolation(cysteine)	4#C	SWATH MS based experiment	PRIDE:0000447	LC MS/MS using an Ultimate 3000 LC system coupled to the TripleTOF 5,600 mass spectrometer (sciex)	MS:1000932	na	In this article,we investigated the expression signature of the mammalian hippocampal synaptic proteomeof rodents; mouse and rat, and primates; marmoset andhuman	synapse, hippocampus, species, neuroplasticity, proteomics, SWATH-MS	LC-MS data measured in DDA mode was analyzed using MaxQuant	no	yes	no	no	no	no	no
PXD009303	29774096	GSTM3 and GSTP1: novel players driving tumor progression in cervical cancer	Human(Homo sapiens)[9606]	NCBITaxon:9606	SiHa,HeLa(Cervical cancer cell lines )	na	EFO:0002379,EFO:0001185BTO:0001967	TMT-6plex	PRIDE:0000314	trypsin	MS:1001251	1	20	0.8	20 ppm	0.8Da	oxidation(methionine)	35#M	TMT 6plex (N-terminal, lysine), carbamidomethylation (Cysteine)	737#N-term,737#K,4#C	Shotgun proteomics	PRIDE:0000429	nanoLC MS/MS system (Q-TOF Synapt G2 MS: Waters)	MS:1001778	na	Our data indicate thecritical role of GST proteins in the regulation and progression of cervical cancer cells.Hence, we suggest GSTM3 and GSTP1 as novel biomarkers and potential therapeutictargets for treating cervical cancer.	GSTP1; GSTM3; cervical cancer; morpholinos; targets genes	search pameter setting were obtained from PRIDE data processing protocol seaction.	PXD005466	yes	yes	no	no	no	no
PXD009333	29858230	Secretory Kinase Fam20C Tunes Endoplasmic Reticulum Redox State via Phosphorylation of Ero1?	Human (Homo sapiens) [9606]	NCBITaxon:9606	HeLa cells	na	CLO:0003684	na	na	trypsin	MS:1001251	2	10	0.02	10 ppm	0.02 Da	oxidation (methionine), phosphorylation (serine, threonine, tyrosine)	35#M,21#S,21#T,21#Y	carbamidomethylation (cysteine)	4#C	na	na	Q Exactive mass spectrometer	MS:1001911	HCD (higher collision induced dissociation)	Here, we report that Fam20C interacts with various luminal proteins and that its depletion results in a more reduced ER lumen. We further show that ER oxidoreductin 1a (Ero1a), the pivotal sulfhydryl oxidase that catalyzes disulfide formation in the ER, is phosphorylated by Fam20C in the Golgi apparatus and retrograde-transported to the ER mediated by ERp44. The phosphorylation of Ser145 greatly …	ER redox, Ero1a, Fam20C, oxidative protein folding, phosphorylation	Database searches were performed on Proteome Discovery software, version 1.4 using SEQUEST HT search engine for protein identification and Percolator for false discovery rate (FDR, < 1%) analysis against a UniProt human protein database.	no	yes	no	no	no	no	no
PXD009338	29777171	MLL-fusion-driven Leukemia Requires SETD2 to Safeguard Genomic Integrity	Human(Homo sapiens)[9606]	NCBITaxon:9606	MOLM13, MV4-11,HEL,HL-60, KYO-1	na	BTO:0004175,BTO:0004479,EFO:0006579,EFO:0002793,	na	na	trypsin	MS:1001251	1	na	na	na	na	Oxidation (methionine)	35#M	Carbamidomethylation (Cysteine)	4#C	AP-MS	PRIDE:0000431	hybrid linear trap quadrupole (LTQ) Orbitrap Velos mass spectrometer coupled to a 1200 series high-performance liquid chromatography via a nano-electrospray ion	MS:1001742	CID	We present the first comprehensive survey of protein?protein interactions of seven distantly related MLL-fusion proteins.	protein-protein interactions,MLL-fusions,	two search engines Mascot and Phenyx are used.	no	yes	no	no	no	no	no
PXD009343	29922247	Proteomic Analysis of Zika Virus Infected Primary Human Fetal Neural Progenitors Suggests a Role for Doublecortin in the Pathological Consequences of Infection in the Cortex	Human (Homo sapiens) [9606]	NCBITaxon:9606	brain (fetal neural progenitor cells)	BTO:0000142	na	TMT (tandem mass tag) labelling	MS:1002615	trypsin	MS:1001251	na	20	0.1	20 ppm	0.1 Da	oxidation	35#M	carbamidomethylation (cysteine), TMT6/10plex (N-terminal), TMT6/10plex (lysine)	4#C,737#N-term,737#K	bottom-up	PRIDE:0000428	Q Exactive mass spectrometry	MS:1001911	HCD (higher energy collisional dissociation)	. In this study, proteomic analysis on ZIKV-infected primary human fetal neural progenitor cells (NPCs) revealed that virus infection altered levels of cellular proteins involved in NPC proliferation, differentiation and migration. The transcriptional levels of some of the altered targets were also con?rmed by qRT-PCR. Among the altered proteins, doublecortin (DCX) plays an important role in NPC …	Zika virus, human fetal neural progenitor cells (NPCs), doublecortin (DCX), cortex structure, proteomic analysis	na	no	yes	no	no	no	no	no
PXD009350	30451909	Obesity Shows Preserved Plasma Proteome in Large Independent Clinical Cohorts	Human (Homo sapiens)[9606]	NCBITaxon:9606	blood	BTO:0000089	na	TMT	MS:1002615	trypsin	MS:1001251	2	10	0.02	10 ppm	0.02 Da	oxidation (methionine), deamidation (asparagine, glutamine), 6plex TMT (peptide N-terminal)	35#M,7#N,7#Q,737#N-term(Peptide)	6plex TMT (lysine), carbamidomethylation (cysteine)	737#K,4#C	shotgun proteomics	PRIDE:0000429	hybrid LTQ-OT Elite , an Ultimate 3000 RSLC nano system	MS:1001910	HCD (higher energy collisional dissociation)	In the present study, we have characterized and compared the plasma proteomes of two large independent cohorts of obese and overweight individuals using shotgun mass spectrometry (MS)-based proteomics. Herein, we showed, in both populations from different continents of about 500 individuals each, the concordance of plasma protein MS measurements in terms of variability, gender-specificity, and ag…	obesity, biomarker, mass spectometery, plasma proteome	this article has multiple projects	PXD009350,PXD005216	yes	no	no	no	no	no
PXD009367	30114907	An Integrated, High-Throughput Strategy for Multiomic Systems Level Analysis	Human(Homo sapiens)[9606]	NCBITaxon:9606	Acute promyelocytic leukemia HL-60 cell, lung carcinoma A549 cells	BTO:0000738,BTO:0000018	na	SILAC	MS:1002611	Trypsin	MS:1001251	2	6	na	6 ppm	na	Oxidation (methionine), Phosphorylation	35#M,21#S,21#T,21#Y	Carbamidomethylation	4#C	Phosphopeptide enrichment	PRIDE:0000587	QExactive HF mass spectrometer (Thermo Scientific) in line with a Dionex Ultimate 3000 nanoLC and autosampler equipped with a nanoelectrospray ionization source.	MS:1002634	HCD	This report details the automation, benchmarking, and application of a strategy for transcriptomic, proteomic, and metabolomic analyses from a common sample. This type of approach will provide an expanded understanding of challenging scientific questions across many fields.	multiomics, transcriptomics, proteomics, metabolomics	na	no	yes	no	no	no	no	no
PXD009396	30327373	Absolute proteome quanti?cation of highly puri?ed populations of circulating reticulocytes and mature erythrocytes	Human(Homo sapiens)[9606]	NCBITaxon:9606	Reticulocyte (Blood), Erythrocyte (Blood)	BTO:0001173,BTO:0000089,BTO:0000424,BTO:0000089	na	Label-Free quantification	MS:1002038	Trypsin	MS:1001251	2	na	na	na	na	Acetylation (protein N-terminal), Oxidation (methionine)	1#N-term(Protein),35#M	Carbamidomethylation (cysteine)	4#C	Shotgun Proteomics	PRIDE:0000429	Dionex U3000 RSLC nano-LC system coupled to an Orbitrap Fusion mass spectrometer	MS:1002732	HCD	The ?ndings representthe ?rst absolute quanti?cation of proteinsthatare speci?cally expressed in normal erythrocytes with no detectable contamination by reticulocytes.	mature erythrocytes, pathological erythrocytes, proteomic analysis	Search parameters settings were obtained from PRIDE dataProcessingProtocol section.	PXD009396,PXD009258	yes	yes	no	no	no	no
PXD009409	30279523	The evolutionary conserved FOXJ1 target gene Fam183b is essential for motile cilia in Xenopus but dispensable for ciliary function in mice	Human (Homo sapiens) [9606], mouse(mus musculus)	NCBITaxon:9606,NCBITaxon:10090	HEK293T cells	na	BTO:0002181	na	na	trypsin	MS:1001251	na	10	1.00	10.0 ppm	1.00 Da	oxidation (methionine), deamidation (asparagine, glutamine)	35#M,7#N,7#Q	carbamidomethylation(cysteine)	4#C	AP-MS	PRIDE:0000431	na	na	na	In this article, we report on the analysis of one of these targets, Fam183b, in Xenopus and mice. Fam183b encodes a protein with unknown function which is conserved from the green algae Chlamydomonas to humans. Fam183b is expressed in tissues harbouring motile cilia in both mouse and frog embryos.	protein complex, mouse, human	The full mass spectrometry proteomics data have been deposited to the ProteomeXchange Consortium via the PRIDE	no	yes	yes	no	no	no	no
PXD009453	29593093	TAILS N-terminomics and proteomics reveal complexregulation of proteolytic cleavage by O-glycosylation	Human (Homo sapiens) [9606]	NCBITaxon:9606	HepG2 cells (The hepatocellular carcinoma cell line)	na	EFO:0001187	TAILS	na	trypsin	MS:1001251	2	10	5	10 ppm	5mmu	Dimethylation(protein N-terminal), acetylation (protein N-terminal), pyroglutamate (peptide N terminal), oxidation (methionine)	36#N-term(protein),1#N-term(Protein),28#N-term(peptide),35#M	carbamidomethyl(cysteine),dimethyl labeling (lysine)	4#C, 36#K	shotgun proteomics	PRIDE:0000429	orbitrap fusion ms, LTQ orbitrap velos pro spectrometer	MS:1002732, MS:1001742	HCD	In this article, we show thatloss ofGalnac-T2O-glycosylationleadsto a general decrease in cleavage and that Galnac-T2 O-glycosylation affects key regulators of the cellular proteolytic network, including multiple members of the serpin family.	PTMs, TAILS, KO, MMP	na	no	yes	no	no	no	no	no
PXD009487	30281021	Changes in mRna abundance drive shuttling of Rna binding proteins, linking cytoplasmic Rna degradation to transcription.	Human(Homo sapiens)[9606], Mouse(Mus musculus)[10090]	NCBITaxon:9606,NCBITaxon:10090	NIH3T3 cells, HEK293T cells	na	EFO:0001222,EFO:0001184	TMT labeling	PRIDE:0000314	Trypsin	MS:1001251	na	5	0.2	5 ppm	0.2Da	Oxidation (methionine),Deamidation (asparagine, methionine), Acetylation (protein N-terminal)	35#M,7#N,7#M,21#S,21#T,21#Y	Carbamidomethylation (cysteine), TMT additions (Peptide N-terminal, lysine)	4#C,739#N-term,739#K	shotgun Proteomics	PRIDE:0000429	LC-MS/MS using a Dionex Ultimate 3000 UPLC coupled online to an EASYSpray ion source and Q Exactive HF	MS:1002634	na	, we uncovered a new role for relocalized cytoplasmic poly(A) binding protein in repressing recruitment of TATA binding protein and Rna polymerase II to promoters. Collectively, our results show that changes in cytoplasmic mRna decay can directly impact protein localization, providing a mechanism to connect seemingly distal stages of gene expression.	na	na	no	yes	no	no	no	no	no
PXD009495	29980614	Thermal proteome profiling in bacteria: probing protein state in vivo	Human (Homo sapiens)[9606],E. coli	NCBITaxon:9606	HepG2 cells, BW25113	na	CLO:0003704	na	na	Trypsin	MS:1001251	3	10	0.02	10 ppm	0.02Da	Acetylation (Protein N-terminal), Oxidation (methionine), TMT10plex (peptide N-terminal)	1#N-term(Protein),35#M,737#N-term(Peptide)	Carbamidomethylation (cysteine), TMT10plex (lysine)	4#C,737#K	na	na	Q Exactive Plus mass spectrometer using a nanospray-Flex ion source.	MS:1002634	na	na	Escherichia coli, metabolic pathways, protein complexes, target engagement, thermal proteome profiling	na	no	yes	no	no	no	no	no
PXD009499	29844425	The RPAP3-Cterminal Domain Identifies R2TP-like Quaternary Chaperones	Human (Homo sapiens) [9606]	NCBITaxon:9606	HeLa Flp-In cells and HEK293 cells	na	CLO:0003684,CLO:0001230	SILAC	MS:1002611	trypsin/P	MS:1001313	na	na	0.5	na	0.5 Da	oxidation (methionine), acetylation (protein N-terminal)	35#M,1#N-term(Protein)	carbamidomethylation (cysteine)	4#C	na	na	LTQ Velos Pro Orbitrap Elite mass spectrometer coupled to an Ultimate 3000	MS:1001910	CID (collision induced dissociation)	Here, we resolve the structure of the conserved C-terminal domain of RPAP3, and we show that it directly binds RUVBL1/RUVBL2 hexamers. The human genome encodes two other proteins bearing RPAP3-C-terminal-like domains and three containing PIH-like domains. Systematic interaction analyses show that one RPAP3-like protein, SPAG1, binds PIH1D2 and RUVBL1/2 to form an R2TP-like complex termed R2SP. Th…	RPAP3-Cterminal domain , R2TP- , quaternary chaperones	this article has multiple projects	PXD009518,PXD009520,PXD009499,PXD009501,PXD009498	yes	no	no	no	no	no
PXD009520	29844425	The RPAP3-Cterminal domain identifies R2TP-like quaternary chaperones	Human(Homo sapiens)[9606]	NCBITaxon:9606	Hela Flp-In cells, HEK293 cells	na	EFO:0001185,EFO:0001182	SILAC	MS:1002611	trypsin	MS:1001251	na	na	0.5	na	0.5 Da	oxidation (methionine),acetylation (N-terminal protein)	35#M,1#N-term(Protein)	Carbamidomethylation (Cysteine)	4#C	na	na	nano-flow liquid chromatography coupled to Fourier transform tandem mass spectrometry (nanoLC-FT-MS/MS) using a LTQ Velos Pro Orbitrap Elite mass spectrometer coupled to an Ultimate 3000	MS:1002835	CID	we resolve the structure of the conserved C-terminal domain of RPAP3, and we show that it directly binds RUVBL1/RUVBL2 hexamers.	co-chaperone,RUVBL1/2,	Multiple project	PXD009518,PXD009520,PXD009499,PXD009501,PXD009498	yes	no	no	no	no	no
PXD009645	29946125	Revealing the immune perturbation of black phosphorus nanomaterials to macrophages by understanding the protein corona	Human (Homo sapiens) [9606]	NCBITaxon:9606	blood plasma	UBERON:0001969	na	na	na	trypsin	MS:1001251	2	20	0.1	20 ppm	0.1 Da	oxidation (methionine)	35#M	carbamidomethyation (cysteine)	4#C	bottom-up	PRIDE:0000428	Q Exactive hybrid mass apectrometer	MS:1002877	na	The increasing number of biological applications for black phosphorus (BP) nanomaterials has precipitated considerable concern about their interactions with physiological systems. Here we demonstrate the adsorption of plasma protein onto BP nanomaterials and the subsequent immune perturbation effect on macrophages. Using liquid chromatography tandem mass spectrometry, 75.8% of the proteins bound …	Transmission electron microscopy (TEM), FASTA, ELISA, corona protein	na	no	yes	no	no	no	no	no
PXD009656	29880867	Alternative assembly of respiratory complex II connects energy stress to metabolic checkpoints	Human (Homo sapiens)[9606]	NCBITaxon:9606	SDHBKO cell lines	na	na	Label- Free Quantifiction	MS:1002038	na	na	na	na	75	na	75ppm	na	na	na	na	na	na	5600 + Triple TOF mass spectrometer	MS:1000189	na	The ?ndings suggest that CIIlow is a core complex inside mitochondria that provides homeostatic control of cellular metabolism depending on the availability of energy.	Mitochondria; SDHA; energy utilization	na	no	yes	no	no	no	no	no
PXD009681	29921876	Nuclear PTEN Safeguards pre-mRna Splicing to Link Golgi Apparatus for Its Tumor Suppressive Role	Human(Homo sapiens)[9606]	NCBITaxon:9606	HUVEC(Human umbilical vein endothelial cells),293T, U251,SW620,RKO,HeLa,DU145,NCM460	na	EFO:0002451,EFO:0001082,BTO:0002035,EFO:0002368,EFO:0001232,EFO:0001185,EFO:0005441	Biotin	CHEBI:15956	semi-trypsin,trypsin	MS:1001251	2	10	1.00	10 ppm	1.00 Da	Oxidation (methionine), Acetylation (N-terminal protein )	35#M,1#N-term(Protein)	Carbamidomethylation (Cysteine)	4#C	AP-MS	PRIDE:0000431	hybrid linear ion trap (LTQ) Orbitrap mass spectrometer	MS:1000449	na	Our results suggest that Golgi secretion inhibitors alone or in combination with PI3K/Akt kinase inhibitors may be therapeutically useful for PTEN-deficient cancers.	protein?protein interaction,Golgi,Mascot	na	no	yes	no	no	no	no	no
PXD009724	30026309	Small molecule inhibitors reveal an indispensable scaffolding role of RIPK2 in NOD2 signaling	Mouse (Mus Musculus)[10090]	NCBITaxon:10090	mouse embryonic ?broblasts (MEFs)	BTO:0004725	na	Label-free Quantification	MS:1002038	Trypsin	MS:1001251	2	na	na	na	na	Oxidation (methionine)	35#M	Carbamidomethylation (cysteine)	4#C	Shotgun Proteomics	PRIDE:0000429	LTQ-Orbitrap Velos mass spectrometer	MS:1000449	CID	The study reveal that RIPK2 kinase activity is dispensable for NOD2 inflammatory signaling and show that RIPK2 inhibitors function instead by antagonizing XIAP-binding and XIAP-mediated ubiquitination of RIPK2	Kinase inhibitor; NOD2 signaling; RIPK2; ubiquitin; XIAP	Default settings for identification and quantification were used, search parameter setting were obtained from PRIDE dataProcessing protocol section	no	yes	yes	no	no	no	no
PXD009738	29786170	Immunopeptidomic Profiling of HLA-A2-Positive Triple Negative Breast Cancer Identifies Potential Immunotherapy Target Antigens	Human(Homo sapiens)[9606]	NCBITaxon:9606	triple-negative breast cancer (TNBC)	BTO:0000149	na	na	na	na	na	na	5	0.03	5 ppm	0.03Da	na	na	na	na	["Affinity purification coupled with mass spectrometry proteomics","Shotgun proteomics"]	PRIDE:0000429	Orbitrap Fusion Lumos	MS:1002732	HCD	we analyzed the immunopeptidomes of six HLA-A2-positive triple negative breast cancer (TNBC) samples by nano-ultra performance liquid chromatography tandem mass spectrometry (nUPLC-MS2 )	HLA-A2; aTaCC; breast cancer; immunopeptidome; mass spectrometry.	search pameter setting were obtained from PRIDE data processing protocol seaction.	no	yes	yes	no	no	no	no
PXD009747	29858227	Centrosomal ALIX Regulates Mitotic Spindle Orientation by Modulating Astral Microtubule Dynamics	Human(Homo sapiens)[9606]	NCBITaxon:9606	HeLa cells	na	EFO:0001185	na	na	trypsin	NCIT:C84232	1	5	0.05	5 ppm	0.05Da	Acetylation(N-terminal), Oxidation (Methionine), Gln->pyro-Glu(N-terminal Glutamine)	1#N-term(Protein),35#M,28#Q(N-term)	carbamidomethylation (Cysteine)	4#C	Gel-based experiment	PRIDE:0000305	nEASY-LC coupled to QExactive	MS:1002835	na	results demonstrate a novel evolutionarily conserved role of ALIX in providing robustness to the orientation of the MS by promoting astral MT formation during asymmetric and symmetric cell division.	ALIX,MAP1S,microtubule,mitotic spindle orientation,??tubulin.	mascot search engine settings, species not sure	no	yes	no	no	no	no	no
PXD009759	30022074	A complex of C9ORF72 and p62 uses arginine methylation to eliminate stress granules by autophagy	Human (Homo sapiens) [9606]	NCBITaxon:9606	HeLa , MDAMB-231	na	CLO:0003684,CLO:0007634	LFQ quantitation	MS:1002038	trypsin	MS:1001251	2	7	0.02	7 ppm	20ppm	oxidation (methionine), acetylation (protein N-terminal), methylation(arginine)	35#M,1#N-term(Protein),36#R	carbamidomethylation(cysteine)	4#C	na	na	Q-Exactive mass spectrometer equipped with a nano-electrospray interface operated in positive ion mode.	MS:1001911	na	Here, we demonstrate that C9ORF72 associates with the autophagy receptor p62 and controls elimination of stress granules by autophagy. This requires p62 to associate via the Tudor protein SMN with proteins, including FUS, that are symmetrically methylated on arginines. Mice lacking p62 accumulate arginine-methylated proteins and alterations in FUS-dependent splicing. Patients with C9ORF72 repeat …	C9ORF72, Oxidative Stress, ALS, LC-MSM	this article has multiple projects	PXD009741PXD009760	yes	no	no	no	no	no
PXD009830	30022119	Shieldin Complex Promotes Dna End-Joining and Counters Homologous Recombination in BRCA1-na Cells	Human(Homo sapiens)[9606]	NCBITaxon:9606	HEK293T	na	EFO:0001184	na	na	trypsin	MS:1001251	3	6	0.02	6 ppm	20 ppm	acetylation(N-terminal protein), oxidation (methionine),n-ethylmaleimide (cysteine)	1#N-term(Protein),35#M,108#C	carbamidomethylation (Cysteine)	4#C	na	na	quadrupole Orbitrap mass spectrometer equipped with EASY -nLC 1000 system	MS:1002732	HCD	we conducted whole-genome CRISPR-Cas9 synthetic-viability/resistance screens in BRCA1-deficient breast cancer cells treated with PARP inhibitors	post-translational modifications,phosphorylation, ubiquitylation, sumoylation	na	no	yes	no	no	no	no	no
PXD009838	29915148	Stable Isotope Dynamic Labeling ofSecretomes (SIDLS) Identifies AuthenticSecretory Proteins Released by Cancer andStromal Cells	Human(Homo sapiens)[9606]	NCBITaxon:9606	CAMs(cancer-associated myofibroblasts)	NCIT:C168534	na	SILAC	MS:1002611	trypsin	MS:1001251	1	20	0.5	20 ppm	0.5Da	oxidation (methionine)	35#M	carbamidomethylation(cysteine)	4#C	na	na	LC system was coupled to a Q-Exactive mass spectrometer	MS:1001911	HCD (higher energy collisional dissociation)	In this,we describe a mass spectrometry-based method for stable isotope dynamic labeling of secretomes (SIDLS) that, by dynamic SILAC, discriminates the secretion kinetics of classical secretory proteins and intracell lar proteins released from cancer and stromal cells in culture	tandem ms, oesophageal cancer,secretome	this article has multiple projects	PXD007231	yes	no	no	no	no	no
PXD009868	30042207	during Translational Arrest	Human(Homo sapiens)[9606]	NCBITaxon:9606	Bone metastasis	BTO:0000140	na	SILAC	MS:1002611	na	na	na	na	na	na	na	na	na	na	na	Shotgun proteomics	PRIDE:0000429	LC-MS/MS on the Q-Exactive mass spectrometer	MS:1001911	HCD	a method for the generic purification of proteincrosslinked Rna, and demonstrate its versatility to	Cancer, Prostate cancer bone metastasis	Multiple Project: PXD004159,PXD004132,PXD003636,PXD003615, PXD003515, PXD003452, and PXD003430. Accession reference for metastatic samples is PXD009868.	PXD004159,PXD004132,PXD003636,PXD003615,PXD003515,PXD003452,PXD003430,PXD009868.	yes	no	no	no	no	no
PXD009870	30132266	LXR/RXR signaling andneutrophil phenotype followingmyocardial infarction classify sex differences inremodeling	Human(Homo sapiens)[9606]	NCBITaxon:9606	Blood(Neutrophils)	BTO:0000089	na	na	na	na	na	na	na	na	na	na	na	na	na	na	na	na	na	na	na	Sex differences in heart failure development following myocardial infarction (MI) are not fully understood. We hypothesized that differential MI signaling could explain variations in outcomes. Analysis of the mouse heart attack research tool 1.0 (422 mice; young = 5.4 ñ 0.1; old = 23.3 ñ 0.1months of age) was used to dissect MI signaling pathways, which was validated in a new cohort of mice (4.8 …	Mice, Humans, Sex differences, Neutrophils, LXR/RXR, Proteomics, Big data	na	no	yes	no	no	no	no	no
PXD009880	30391543	Deficiency of the mitochondrial sulfide regulator ETHE1 disturbs cellgrowth, glutathione level and causes proteome alterations outsidemitochondria	Human(Homo sapiens)[9606]	NCBITaxon:9606	skin(dermal fibroblasts)	BTO:0001255	na	na	na	trypsin	MS:1001251	2	8	0.03	8 ppm	30mmu	oxidation(methionine)	35#M	TMT 6-Plex(lysin,N-terminal),carbamidomethylation(cysteine)	737#K,737#N-term,4#C	na	na	Q Exactive plus Hybrid Quadrupole orbitrap	MS:1002877	HCD	In this artice, the study shows lower level of the redox regulatorGSH in fibroblasts from ETHE1-deficient patients, which most likely is akey factor for the dysregulated cell growth	Ethylmalonic encephalopathy Sulfide,Glutathione,Glycosylation,Redox regulation,Mitochondrion	na	no	yes	no	no	no	no	no
PXD009897	29991651	IKK Promotes Cytokine-Induced and Cancer-Associated AMPK Activity and Attenuates Phenformin-Induced Cell Death in LKB1Deficient Cell	Human(Homo sapiens)[9606]	NCBITaxon:9606	HepG2 cells and human hepatocytes	BTO:0000599,	na	na	na	trypsin	MS:1001251	na	10	0.6	10 ppm	0.6Da	Oxidation (methionine), Phosphorylation(serine, threonine, tyrosine)	35#M,21#S,21#T,21#Y	na	na	Shotgun Proteomics	PRIDE:0000429	na	na	na	In this study we explored a potential relationship between IKK and AMPK, and demonstrated that IKK was required for basal and cytokine-induced AMPK Thr172 phosphorylation in various cell lines, regardless of LKB1 status	search parameter setting were obtained from PRIDE dataProcessing protocol section	na	no	yes	yes	no	no	no	no
PXD009914	30143613	The Dual Methyltransferase METTL13 Targets N Terminus and Lys55 of eEF1A and Modulates Codon-Specific Translation Rates	Human(Homo sapiens)[9606]	NCBITaxon:9606	HAP-1 cell culture	na	EFO:0007598	SILAC	MS:1002611	trypsin	NCIT:C84232	na	na	na	na	na	Methylation(monolysine,dilysine,trilysine), Methylation(monoarginine, diarginine), Acetylation (N-terminal protein),Gln->pyroGlu (N-terminal)	34#K,34#K,34#K,34#R,34#R,1#N-term(Protein),28#Q(N-term)	na	na	na	na	Q Exactive HF MS	MS:1002523	HCD	eEF1A delivers aminoacyl-tRna to the ribosome andthereby plays a key role in protein synthesis	METTL13, Methylation	Multiple project	PXD008115,PXD008131,PXD009895,PXD009914	yes	no	no	no	yes	no
PXD009933	30497457	Proteomic profiling of senescent human diploid fibroblasts treated with gammatocotrienol	Human(Homo sapiens)[9606]	NCBITaxon:9606	foreskins fibroblast cell line	na	BTO:0002245	Label-free Quantification	MS:1002038	Trypsin	MS:1001251	na	na	na	na	na	Oxidation (methionine), Acetylation(N-terminal)	35#M,1#N-term	Carbamidomethylation (cysteine)	4#C	na	na	Q Exactive HF hybrid quadrupole-Orbitrap MS	MS:1002634	na	LFQ proteomic analysis in this study showed that PDGFRB protein level was lower and TUBB2A protein level was higher in senescent HDFs than young cells, suggesting that pathways such as growth factor signaling and cytoskeletal regulation may be dysregulated during cellular senescence.	Gamma-tocotrienol, Replicative senescence, Human diploid fibroblasts, Proteomics	na	no	yes	no	no	no	no	no
PXD009969	30030424	Abnormal Rna stability in amyotrophic lateral sclerosis	Human(Homo sapiens)[9606]	NCBITaxon:9606	Fibroblast (Skin)	BTO:0001255	na	Tandem mass tag (TMT) labeling	PRIDE:0000314	Procine trypsin	NCIT:C97471	na	10	0.6	10 ppm	0.6Da	Oxidation (methionine), Deamidation (asparagine, glutamine )	35#M,7#N,7#Q	Carbamidomethylation (cysteine), TMT labeling (lysine, N-terminal Peptide)	4#C,739#K,739#N-term	Bottom-up	PRIDE:0000428	Orbitrap Fusion with RSLC Ultimate 3000 nano-UPLC	MS:1002732	CID	This study shows that TDP-43 deposition leads to targeted Rna instability in ALS and FTD, and may ultimately cause cell death by disrupting energy production and protein synthesis pathways.	na	na	no	yes	no	no	no	no	no
PXD010012	30385480	Online Parallel Accumulation?Serial Fragmentation (PASEF) with a Novel Trapped Ion Mobility Mass Spectrometer	Human(Homo sapiens)[9606], E.coli (Escherichia coli)[562]	NCBITaxon:9606	HeLa S3, ATCC (cervical cancer cells)	na	EFO:0002791,CLO:0000006	Label-Free quantification	MS:1002038	Trypsin	MS:1001251	2	70	35	70 ppm	35ppm	Acetylation (protein N-terminal), Oxidation (methionine)	1#N-term(Protein),35#M	Carbamidomethylation ( Cysteine)	4#C	Bottom-up, Shotgun proteomics	PRIDE:0000428, PRIDE:0000429	An EASY-nLC 1200 ultra-high pressure nano-flow chromatography system was coupled online to a hybrid trapped ion mobility spectrometry - quadrupole time of flight mass spectrometer with modified nano-electrospray ion source.	CHMO:0000499	Parallel Accumulation?Serial Fragmentation (PASEF)	We introduce the timsTOF Pro instrument, ,which optimally implements online PASEF. We also show that highly reproducible collisional cross sections can be acquired on a large scale.	PASEF, TIMS-QTOF Instrument,	All other MaxQuant parameters were kept at their default values.	no	yes	no	no	no	no	no
PXD010155	30327431	Probing the contribution of individual polypeptideGalnac-transferase isoforms to the O-glycoproteome byinducible expression in isogenic cell lines	Human(Homo sapiens)[9606]	NCBITaxon:9606	HEK293(HEK)	na	BTO:0000007	TMT	MS:1002615	trypsin	MS:1001251	na	6	0.02	6 ppm	20mmu	oxidation(methionine),HeXnac(serine,threonine,tyrosine)	35#M,43#S,43#T,43#Y	carbamidomethylation(cysteine)	4#C	na	na	orbitrap fusion ms	MS:1002416	HCD, ETD	In this study, we developed isogenic human embryonic kidney HEK293 (HEK) cell lines with inducible expression of Galnac-T2 or -T11.	GALnaCT, KO, KI	na	no	yes	no	no	no	yes	no
PXD010223	30010936	ATR-mediated proteome remodeling is a major determinant of homologous recombination capacity in cancer cells.	Human(Homo sapiens)[9606]	NCBITaxon:9606	U2OS, HCT116, hTERT RPE-1, HEK293T, HeLa, U87, T98G, A2780 and human skin fibroblast cells (GM08398 and GM18366)	na	CLO:0009454,CLO:0054364,CLO:0004290,CLO:0037238,CLO:0003684,CLO:0009464,CLO:0009236,CLO:0001571CLO:0010526,CLO:0031106	SILAC	MS:1002611	Trypsin	MS:1001251	na	na	na	na	na	na	na	na	na	na	na	Q-Exactive Orbitrap and Lumos mass spectrometer	MS:1001911	na	na	na	na	no	yes	no	no	no	no	no
PXD010312	29895970	TRPS1 regulates estrogen-receptor binding and histone acetylation at enhancers	Human (Homo sapiens)[9606]	NCBITaxon:9606	MCF7, T47D and ZR75-1 human cell lines	na	CLO:0007606,CLO:0009251,BTO:0003136	na	na	na	na	na	na	na	na	na	na	na	na	na	AP-MS	PRIDE:0000431	na	na	na	Our data suggests that TRPS1 is an important ER associated transcriptional repressor that regulates cell proliferation, chromatin acetylation and ER binding at the chromatin of cis-regulatory elements.	RIME, ZNF217, breast	na	no	yes	no	no	no	no	no
PXD010361	30190327	Plasma membrane profiling during enterohemorrhagic E.coli infection reveals that the metalloprotease StcE cleaves CD55 from host epithelial surfaces	Human(Homo sapiens)[9606], E.coli (Escherichia coli)[562]	NCBITaxon:9606	HeLacells(ATCC)	na	CLO:0003684,CLO:0000006	SILAC	MS:1002611	Trypsin/P	MS:1001313	3	na	na	na	na	Oxidation (methionine), Acetylation (N-terminal )	35#M,1#N-term(Protein)	Carbamidomethylation ( Cysteine)	4#C	na	na	Easy-nLC 1000 coupled to Q Exactive Hybrid Quadrupole-OrbitrapTM Mass Spectrometer via an EASY-Spray nano-ESI source	MS:1001911	HCD	We showed by flow cytometry and Western blot analysis that CD55 is cleaved from the cell surface by the EHEC-specific proteaseStcEandfoundthatStcEmediatedCD55 cleavage results in increased neutrophil adhesion to theapical surface of intestinal epithelial cells.This suggests that StcE alters host epithelial surfaces to depress neutrophil transepithelial migration during infection.	SDS-PAGE, CD55, Cell-surface	All other parameters were used as pre-setin MaxQuant version 1.5.8.5 .	no	yes	no	no	no	no	no
PXD010398	30320547	Dynein-2 intermediate chains play crucial but distinct roles in primary cilia formation and function	Human(Homo sapiens)[9606]	NCBITaxon:9606	HEK293T, hTERTRPE-1	na	EFO:0001184,CLO:0004290	TMT-labelling	PRIDE:0000314	Trypsin	MS:1001251	1	10	0.6	10 ppm	0.6Da	Oxidation (methionine)	35#M	Carbamidomethylation (cysteine), TMT mass tag (Peptide N-terminal, lysine)	4#C,739#K,739#N-term	na	na	Orbitrap Fusion Tribrid mass spectrometer	MS:1002416	HCD	In this study, we sought to better understand the role of dynein-2 in human cells using engineered knockout (KO) cell lines for WDR34 and WDR60. We define a functional asymmetry within the complex, where WDR34 is absolutely required for cilia extension, while WDR60 is not	Ciliogenesis, Immunofluorescence	na	no	yes	no	no	no	no	no
PXD010417	30067223	Thalidomide promotes degradation of SALL4, a transcription factor implicated in Duane Radial Ray syndrome	Human(Homo sapiens)[9606], Mouse(Mus musculus)[10090]	NCBITaxon:9606,NCBITaxon:10090	HEK293T, SK-N-DZ, MM1s, H661, H9 hESC, mESC, and Kelly cells	na	EFO:0001184,EFO:0005721,BTO:0003933,CLO:0008103,EFO:0003045,CLO:0037317,CLO:0007091	TMT labeling	PRIDE:0000314	Trypsin	MS:1001251	2	20	0.6	20 ppm	0.6Da	Oxidation (methionine)	35#M	Alkylation (cysteine),TMT labeling (lysine, N-terminal peptide)	739#K,739#N-term	na	na	Orbitrap Fusion Lumos mass spectrometer coupled with a Proxeon EASY-nLC 1200 LC pump	MS:1002732	HCD	We show that IMiDs disrupt a broad transcriptional network through induced degradation of several C2H2 zinc finger transcription factors, including SALL4, a member of the spalt-like family of developmental transcription factors.	na	na	no	yes	no	no	no	no	no
PXD010418	30067223	Thalidomide promotes degradation ofSALL4, a transcription factor implicated inDuane Radial Ray syndrome	Human (Homo sapiens) [9606], mouse(mus musculus)	NCBITaxon:9606,NCBITaxon:10090	HEK293T cells	na	BTO:0002181	TMT	MS:1002615	trypsin	MS:1001251	2	20	0.6	20 ppm	0.6Da	oxidation(methionine)	35#M	carbamidomethylation (cysteine), TMT (lysine, N-terminal peptides)	4#C,737#K,737#N-term(Peptide)	AP-MS	PRIDE:0000431	orbitrap fusion lumos mass spectrometer coupled with a Proxeon EASY-nLC 1200 LC pump	MS:1002732	HCD	Here we showthat IMiDs disrupt a broad transcriptional network through induced degradation of several C2H2zinc finger transcription factors, including SALL4, a member of the spalt-like family ofdevelopmental transcription factors We find that thalidomide induces degradation of SALL4 exclusively in humans, primates,and rabbits, but not in rodents or fish, providing a mechanistic link for the speci…	IMiDs, thalidomide, ubiquitin, cullin, crl4	this article has multiple projects	PXD010416,PXD010417,PXD010418,PXD010420,PDX010428	yes	no	no	no	no	no
PXD010420	30067223	Thalidomide promotes degradation ofSALL4, a transcription factor implicated inDuane Radial Ray syndrome	Human(Homo sapiens)[9606],Mouse(Mus musculus)[10090]	NCBITaxon:9606,NCBITaxon:10090	HEK293T cells	na	BTO:0002181	TMT	MS:1002615	trypsin	MS:1001251	2	20	0.6	20 ppm	0.6Da	oxidation(methionine)	35#M	carbamidomethylation (cysteine), TMT (lysine, peptide N-terminal)	4#C,739#K,739#N-term(peptide)	na	na	orbitrap Fusion lumos ms	MS:1002732	HCD	In this article, We show that thalidomide, lenalidomide, and pomalidomide all induce degradation of SALL4, whichhas been causatively linked to the most characteristic and common birth defects of the limbs andinner organs by human genetics.	CRISPR	this article has multiple projects	PXD010416,PXD010417,PXD010418,PXD010420,PDX010428.	yes	no	no	no	no	no
PXD010516	30269983	Mechanisms Preserving Insulin Action during HighDietary Fat Intake	Human(Homo sapiens)[9606],Mouse(Mus musculus)[10090]	NCBITaxon:9606,NCBITaxon:10090	blood	BTO:0000089	na	na	na	trypsin	MS:1001251	na	na	na	na	na	na	na	na	na	na	na	Q Exactive HF MS orbitrap	MS:1002523	na	In this article, Here we provide mechanistic information about metabolic adaptation to fat-rich diets.	tandem ms	na	no	yes	no	no	no	no	no
PXD010538	30368041	Nitric oxide contributes to protein homeostasis by S-nitrosylations of the chaperone HSPA8 and the ubiquitin ligase UBE2D	Human (Homo sapiens)[9606]	NCBITaxon:9606	Neuroblastoma cells (SH-SY5Y)	na	EFO:0002717	Label-free Quantification	MS:1002038	Trypsin	MS:1001251	2	20	0.5	20 ppm	0.5 da	Acetylation(N-Terminal), Oxidation (methionine), N-ethylmaleimideon (cysteine), Biotinylation (iodoacetamide)	1#N-term,35#M,108#C,	Carbamidomethylation (cysteine)	4#C	Shotgun proteomics	PRIDE:0000429	Orbitrap Elite mass spectrometer	MS:1001910	na	The observed changes of protein degradation pathways caused an expansion of the cytoplasm, large lysosomes, slowing of the cell cycle and suppression of proliferation suggesting a switch of the phenotype towards aging, supported by downregulations of neuronal progenitor markers but increase of senescence-associated proteins. Hence, upregulation of nNOS in neuronal cells imposes aging by SNOing of…	neuronal NOS, SH-SY5Y human neuroblastoma, starvation, Rapamycin	SEARCH PARAMETERS ARE DERVIVED FROM PRIDE DATABASE	no	yes	yes	no	no	no	no
PXD010634	30341083	Whole Proteome Profiling of N-Myristoyltransferase Activity and Inhibition Using Sortase A	Human(Homo sapiens)[9606]	NCBITaxon:9606	MDA-MB-231, Panc-1 , HeLa cells	na	CLO:0007634,CLO:0008381,CLO:0003684	TMT-labelling	PRIDE:0000314	Trypsin/P	MS:1001313	2	4.5	0.02	4.5 ppm	20ppm	Oxidation (methionine), Acetylation(Protein N-terminal)	35#M,1#N-term(Protein)	Carbamidomethylation (cysteine)	4#C	na	na	Easy nLC-1000 was coupled to a QExactive mass spectrometer via an easy-spray source	MS:1001911	HCD	Our new methodology is complementary to metabolic tagging strategies, providing the first approach for whole proteome gain-of signal readout for NMT inhibition in complex samples which are not amenable to metabolic tagging	Staphylococcus aureus Sortase A (SrtA), ELISA	search parameter setting were obtained by Andromeda search engine.	no	yes	no	no	no	no	no
PXD010737	30257202	?-TrCP- and Casein Kinase II-Mediated Degradation of Cyclin F Controls Timely Mitotic Progression	Human(Homo sapiens)[9606]	NCBITaxon:9606	HEK293T, HeLa, and U2OS	na	EFO:0001196,EFO:0001185,EFO:0001184,	na	na	trypsin,chymotrypsin	MS:1001251,MS:1001306	na	5	0.5	5 ppm	0.5Da	carbamidomethylation (cysteine),deamidation (asparagine,glutamine), oxidation (methionine),phosphorylation (serine,threonine,tyrosine), phosphorylation (Cysteine)	4#C,7#N,7#Q,35#M,21#S,21#T,21#Y,21#C	na	na	Acquity nano UPLC system (Waters) equipped with a 25 cm C18 column, 1.7 æm particle size (Waters) online coupled to an LTQ Orbitrap Velos (Thermo Scientific)	MS:1001742	LTQ Orbitrap Velos	MS:1001742	na	In this study, we show that cyclin F is recognized by b-TrCPthrough a TSGXXS motif after phosphorylation of two serine residues(S700 and S704). We provide evidence that the phosphorylationof S704 is regulated by S709 and that the kinase responsiblefor the phosphorylation of S704 is CKIIa.	F-box protein, cyclin F, ?-TrCP, mitosis, cell cycle, ubiquitin, SCF, CRLs, CKII	na	no	yes	no	no	no	no	no
PXD010786	30217950	Functional Proteomics and Deep Network Interrogation Reveal a Complex Mechanism of Action of Midostaurin in Lung Cancer Cells	Human (Homo sapiens) [9606]	NCBITaxon:9606	A427, A549, H2170, HCC4006, and PC9 cells	na	EFO:0002104,CLO:0001601,CLO:0008059,CLO:0003657,BTO:0005518	TMT (tandem mass tag) labeling	MS:1002615	trypsin/P (proteolytic enzyme)	MS:1001313	2	20	0.05	20 ppm	0.05 Da	oxidation (methionine), acetylation (N-terminal), phosphorylation (serine, threonine, tyrosine)	35#M,1#N-term,21#S,21#T,21#Y	carbamidomethylation (cysteine)	4#C	na	na	hybrid orbitrap mass spectometer	MS:1000484	na	To determine the underlying mechanism of action we applied a layered functional proteomics approach and a new data integration method. Using chemical proteomics, we identified multiple midostaurin kinase targets in these cells. Network-based integration of these targets with quantitative tyrosine and global phosphoproteomics data using protein-protein interactions from the STRING database suggest…	Cancer Biology, Chemical biology, Chemoproteomics, Mechanism of action, Phosphoproteome	This article has multiple projects: PXD009041, PXD010786, PXD010787	PXD009041,PXD010786,PXD010787	yes	no	no	no	no	no
PXD010870	30242148	Gap junction protein Connexin-43 is a directtranscriptional regulator of N-cadherin in vivo	Human (Homo sapiens) [9606], Xenopus laevis	NCBITaxon:9606,NCBITaxon:8355	HeLa cells, Xenopus embryonic fibroblasts	na	CLO:0003684,BTO:0004725	na	na	trypsin,lysC	MS:1001251,MS:1001309	na	na	na	na	na	na	na	na	na	na	na	Q-Exactive HF, Thermo specific	MS:1002523	na	Here, we demonstrate that in addition to this canonicalrole, Connexins act as transcriptional regulators. We show that Connexin 43 (Cx43) controlsneural crest cell migration in vivo by directly regulating N-cadherin transcription	AP-MS, CO-IP, HeLa	na	no	yes	no	no	no	no	no
PXD011042	30406044	Proteomic Pro?ling of Burkholderia thailandensis During Host Infection Using Bio-Orthogonal Noncanonical Amino Acid Tagging (BONCAT)	Human (Homosapien) [9606] , BURTA (Burkholderia thailandensis) [271848]	NCBITaxon:9606,NCBITaxon:57975	A549 cell line	na	CLO:0001601	isotope labeling	PRIDE:0000310	trypsin	MS:1001251	2	10	0.02	10 ppm	0.02 Da	Oxidation (methionine), acetylation (N-terminal), (N-terminal glutamine) Gln->pyroGlu, Deamidation (asparagine, glutamine), Met->Anl (Methionine), Met->Anl-Biotin (Methionine)	35#M,1#N-term,28#Q(N-term),7#Q,7#N	carbamedomethylation (cysteine)	4#C	bottom-up	PRIDE:0000428	Q Exactive hybrid quadrupole-Orbitrap	MS:1002877	na	In this study, we show that B. thailandensis proteins were selectively labeled and ef?ciently enriched from infected host cells using BONCAT. We also demonstrate that this method can be used to label bacteria in situ by ?uorescent tagging. Finally, we present a global proteomic pro?le of B. thailandensis as it infects host cells and a list of proteins that are differentially regulated in infectio…	Burkholderia thialendensis, BONCAT, orthogonal amino acid labeling, intracellular pathogen, host infection, protein enrichment, proteome pro?ling, quorum sensing (QS)	in this article, search parameter setting were obtained from PRIDE dataProcessingProtocol section .	no	yes	yes	no	no	no	no
PXD011058	30356100	Nuclear lactate dehydrogenase A senses ROS to produce ?-hydroxybutyrate for HPV-induced cervical tumor growth	Human (Homo sapiens)[9606]	NCBITaxon:9606	Primary human cervix keratinocytes (PHKs) [normal cervical epithelial], HaCaT, HEK293T, SiHa, C33A, and HeLa cells lines.	na	EFO:0001184,CLO:0009017,CLO:0003684	TMT labeling	PRIDE:0000314	Trypsin	MS:1001251	2	15	0.02	15 ppm	20mmu	na	na	na	na	Shotgun proteomics	PRIDE:0000429	Q-Exactive HF	MS:1002634	na	The ?ndings uncover a non-canonical enzyme activity of nuclear LDHA to epigenetically control cellular redox balance and cell proliferation facilitating HPV-induced cervical cancer development.	Quantitative RT-PCR, Xenograft model,	Data were analysed by ProteinPilot program (v5.0.1) according to default parameters.	no	yes	yes	no	no	no	no
PXD011118	30348809	A novel germline variant in CSF3R reduces N-glycosylation and exerts potent oncogenic effects in leukemia	Mouse (Mus Musculus)[10090]	NCBITaxon:10090	Ba/F3 cells (Bone Marrow)	BTO:0000141	na	na	na	Chymotrpsin	NCIT:C76568	2	10	0.02	10 ppm	20ppm	Oxidation (methionine)	35#M	Carbamidomethylation (cysteine)	4#C	Shotgun proteomics	PRIDE:0000429	na	na	Electron transfer dissociation (ETD)	This study reveals the critical importance of membrane-proximal N-linked glycosylation of CSF3R for the maintenance of ligand dependency in leukemia.	CSF3R; GCSFR; myeloid leukemia; glycosylation; receptor activation	search parameter setting were obtained from PRIDE dataProcessing protocol section	no	yes	yes	no	no	no	no
PXD011126	30375385	M-Phase Phosphoprotein 9 regulates ciliogenesis by modulating CP110-CEP97 complex localization at the mother centriole	Mouse (Mus Musculus)[10090]	NCBITaxon:10090	Mouse embryonic ?broblasts (MEFs), liver tissue	BTO:0004725,BTO:0000759	na	na	na	Trypsin	MS:1001251	2	5	0.6	5 ppm	0.6Da	Oxidation (methionine)	35#M	Carbamidomethylation (cysteine)	4#C	Shotgun Proteomics	PRIDE:0000429	Orbitrap Elite mass spectrometer	MS:1001910	na	In this study, we show that MPP9 is localized at the distal ends of centrioles in a small ring-like structure and recruits the CP110CEP97 complex at the distal end of the mother centriole in ciliary cells.	Tau Tubulin Kinase 2 (TTBK2),	search parameter setting were obtained from PRIDE dataProcessing protocol section	no	yes	yes	no	no	no	no
PXD011175	30532160	Automated phosphopeptide enrichmentfrom minute quantities of frozen malignantmelanoma tissue	Human (Homo sapiens) [9606]	NCBITaxon:9606	malignant melanoma tissue	BTO:0000848	na	label-free quantification (LFQ)	MS:1002038	trypsin,lysC	MS:1001251,MS:1001309	2	10	0.02	10 ppm	0.02Da	oxidation(methionine)	35#M	carbamidomethylation(cysteine),acetylation(protein N-terminal),phosphorylation(serine,threonine,tyrosine)	4#C,1#N-term(Protein),21#S,21#T,21#Y	phosphopeptide enrichment	PRIDE:0000587	Ultimate 3000 HPLC coupled to a Q Exactive HF-X mass spectrometer	MS:1002877	HCD (higher energy collisional dissociation)	In this article, To acquire a deeper understanding of malignant melanoma (MM), it is essential to study the proteome of patient tissues. In particular, phosphoproteomics of MM has become of significant importance because of the central role that phosphorylation plays in the development of MM.	Phosphopeptide enrichment, malignant melanoma phosphoproteomics, Bravo AssayMap, sensitivity, Fe(III)-IMAC.	na	no	yes	no	no	no	no	no
PXD011187	30459281	Phosphoproteome and gene expression profiling of ALK inhibition in neuroblastoma cell lines reveals conserved oncogenic pathways	Human(Homo sapiens)[9606]	NCBITaxon:9606	Neuroblastoma cell lines CLB-BAR, CLB-GE, IMR-32, SK-N-AS	na	CLO:0006948,CLO:0009051	na	na	na	na	na	na	na	na	na	na	na	na	na	Phospho proteomics	PRIDE:0000587	immunoaffinity-coupled liquid chromatography?tandem mass spectrometry (LC-MS/MS)	NCIT:C122168	na	This analysis has unveiled various important leads for novel combinatorial treatment strategies for patients with neuroblastoma and an increased understanding of ALK signaling involved in this disease.	phospho proteomics , Rnaseq study	MS/MS spectra were evaluated using a SEQUEST 3G and the SORCERER 2 platform (pubmed id: 22322096)	no	yes	no	no	no	no	no
PXD011309	30340394	Identi?cation of Potential Plasma Biomarkers for Abdominal Aortic Aneurysm Using Tandem Mass Tag Quantitative Proteomics	Human (Homo sapiens)[9606]	NCBITaxon:9606	Plasma Sample	BTO:0000131	na	TMT-labelling	PRIDE:0000314	Trypsin	MS:1001251	1	10	0.1	10 ppm	100mmu	Oxidation (methionine), Carbamidomethylation (cysteine)	35#M,4#C	TMT6plex (lysine, N-terminal)	737#K,737#N-term	na	na	Q Exactive mass spectrometer interfaced with an Easy-nLC 1000 nano LC system	MS:1001911	Stepped HCD	The present study used an alternative proteomic approach to ?nd new, potential plasma AAA biomarker candidates. Pre-fractionated plasma samples from twelve patients with AAA and eight matched controls without aneurysm were analyzed by mass spectrometry applying a tandem mass tag (TMT) technique.	aortic aneurysm, biomarker, bleomycin hydrolase, clinical proteomics, mass spectrometry, proteomics	na	no	yes	no	no	no	no	no
PXD011456	30846556	Global analysis of methionine oxidation provides acensus of folding stabilities for the human proteome	Human (Homo sapiens) [9606]	NCBITaxon:9606	(HCA2-h Tert) human diploid fibroblast expressing telomerase	BTO:0000452	na	TMT	MS:1002615	trypsin	MS:1001251	2	na	na	na	na	oxidation(methionine)	35#M	TMT 10-plex	na	shotgun proteomics	PRIDE:0000429	Q Exactive plus mass spectrometer	MS:1002634	HCD	Here,we used a mass spectrometry-based approach to measure thestabilities of ?10,000 unique domains within ?3,000 proteins inhuman cell extracts. Our data provide a global census of themagnitudes of folding stabilities within the human proteome andidentify specific subsets of the proteome that are enriched in stableand unstable domains. We also show that the stability of proteinsimpacts their ten…	protein stability, protein folding, methionine oxidation	this article is not open access, All analyzed data and measurements can be found in supplemental Datasets.	no	yes	no	no	no	no	no
PXD011755	30513899	Comparison of Two Solid-Phase Extraction (SPE)Methods for the Identification and Quantificationof Porcine Retinal Protein Markers by LC-MS/MS	Human (Homo sapiens) [9606],pig(Sus scrofa)	NCBITaxon:9606,NCBITaxon:9823	retinal tissues	BTO:0001024	na	label-free quantification	MS:1002038	trypsin	MS:1001251	1	30	0.5	30 ppm	0.5Da	oxidation, acetylation(protein N-terminal)	35#M,1#N-term(Protein)	carbamidomethylation	4#C	peptide enrichment	PRIDE:0000587	LTQ Orbitrap XL	MS:1000556	CID	The main objective ofthis study was to compare two commercial solid-phase extraction (SPE)-based sample preparationprotocols (comprising SOLAæTM HRP SPE spin plates from Thermo Fisher Scientific and ZIPTIP©C18 pipette tips from Merck Millipore) for analytical performance, reproducibility, and analysis speed,In conclusion, both SPE-based purificationmethods worked equally well in terms of analytic…	mass spectrometry, glaucoma animal model, biomarkers, sample clean-up, ZIPTIP© C18 pipette tips, SOLAæTM HRP SPE spin plates	na	no	yes	no	no	no	no	no
PXD000218	24648465	Cross-species Proteomics Reveals Specific Modulation of Signaling in Cancer and Stromal Cells by Phosphoinositide 3-kinase (PI3K) Inhibitors	Mice(Mus musculus)[10090], Human(Homo sapiens)[9606]	NCBITaxon:10090,NCBITaxon:9606	Colorectal cell-line DLD-1	na	EFO:0006389	na	na	trypsin	MS:1001303	na	5	0.6;0.05	5 ppm	600mmu;50mmu	phosphorylation (serine, threonine, tyrosine);oxidation (methionine), pyroglutamate(N terminal)	21#S,21#T,21#Y;35#M,28#N-term	na	na	phospho-enrichment;na	PRIDE:0000587;na	LTQ Orbitrap Velos mass spectrometer	MS:1001742	CID;HCD	To investigate how in vivo growth conditions and PI3K inhibitors regulate pathway activities in both cancer and stromal cell populations. Study provides proof-of-principle of a proteomics workflow for measuring signaling specifically in cancer and stromal cells and for investigating how cancer biochemistry is modulated in vivo.	tumor, phosphoproteomics,;tumor, proteomics	cross-species project	no	yes	no	no	no	no	yes
PXD000760	26628894	Hepatocytes Respond Differently to Major Dietary Trans Fatty Acid Isomers, Elaidic Acid and Trans-Vaccenic Acid	Human (Homo sapiens) [9606]	NCBITaxon:9606	HepG2-SF cells	na	BTO:0006301	SILAC;na	MS:1002611;na	trypsin	MS:1001251	1	10;1200	0.2 ;0.6	10 ppm;1.2 Da	0.2 Da;0.6 Da	oxidation (methionine);carbamidomethyl, propionamide, oxidation (methionine)	35#M;4#C,24#C,35#M	propionamide;na	24#C;na	na	na	ESI-QUAD-TOF	MS:1000189	na	We have investigated the hepatocellular responses to the predominant trans fatty acid isomers in industrially produced partially hydrogenated vegetable oils (elaidic acid) and products of ruminant origin (trans-vaccenic acid). Results: The responses of HepG2-SF cells exposed to 100 ?M fatty acids during 7 days were examined. Elaidic acid decreased the cellular proliferation rate while trans-vacce…	Cardiovascular disease, Lipid metabolism, Trans fatty acid, Proteomics, SILAC	the data were searched against Swiss-Prot Homo Sapiens database (v. 2013_11/12) using Mascot v. 2.3.02 (Matrix Science;Data were processed using MassLynx 4.0 software (Waters). MS/ MS data are searched against SwissProt (v. 2014_02) limited to human taxonomy using Mascot v. 2.3.02 (Matrix Sciences).	no	yes	no	no	no	no	yes
PXD001118	25167464	Evaluation of Proteomic Search Engines for the Analysis of Histone Modi?cations	Human (Homo sapiens) [9606]	NCBITaxon:9606	HeLa cells	na	CLO:0003684	na	na	trypsin	MS:1001251	2	10	0.02 ;0.4	10 ppm	0.02 Th (HCD);0.4 Th (CID)	propionylation(lysine),acetylation(lysine),dimethylation(lysine),trimethylation(lysine),phosphorylation(serine,threonine)	58#K,1#K,36#K,37#K,21#S,21#T	propionylation(peptideN-terminal)	58#N-term	na	na	Q-Exactive mass spectometer, Orbitrap Velos Pro spectrometer;Orbitrap Velos Pro spectrometer, Q-Exactive mass spectometer	MS:1001911,MS:1001742;MS:1001742,MS:1001911	HCD (higher collision induced dissociation), CID (collision induced dissociation)	we present a method in which one kind of modi?cation is searched each time, for example, unmodi?ed, individually modi?ed, and multimodi?ed, each search result is ?ltered with false discovery rate less than 1%, and the identi?cations of multiple search engines are combined to obtain con?dent results. We apply this method for eight search engines on histone data sets. We ?nd that two search engines…	histone, proteomics, post-translational modi?cation, data analysis, search engine	In total, we have 112 searches (i.e., two data sets, eight search engines, and seven searches). Here histone data sets are used with seven searches mentioned in variable modifications and eight search engines which are : pFind, Mascot , SEQUEST, ProteinPilot , PEAKS , OMSSA in COMPASS , X!Tandem in TPP and Andromeda in MaxQuant)	no	yes	no	no	no	no	yes
PXD003271	27128972	Proteo transcriptomic Analysis Reveals Stage Specific Changesinthe Molecular Landscape of Clear-Cell Renal Cell Carcinoma [Individual Sample];Proteo transcriptomic Analysis Reveals Stage Specific Changesinthe Molecular Landscape of Clear-Cell Renal Cell Carcinoma [Pooled Sample]	Human (Homo sapiens) [9606]	NCBITaxon:9606	ccRCC (clear-cell renal cellcarcinoma) tissues	EFO:0000349	na	label free	MS:1002038	trypsin	MS:1001251	2;1	2000;10	0.5 ;0.40	2 Da;10 ppm	0.5 Da;0.40 Da	acetylation (protein N-terminal), oxidation (methionine), deamidation (asparagine, glutamine);oxidation (methionine)	1#N-term(Protein),35#M,7#N,7#Q;35#M	carbamidomethylation (cysteine);alkylation (cysteine, IAA {indole-3-acetic acid})	4#C;na	shotgun proteomics	PRIDE:0000429	ESI-TRAP;LTQ Orbitrap XL	MS:1000073;MS:1000556	na	ThecurrentstudyfocusedonevaluatingccRCC stagedependentchanges attheproteomeleveltoprovideinsightintothemolecular pathogenesisofccRCCprogression.Toaccomplishthis,label-freeproteomicswasusedtocharacterizematchedtumor andnormal-adjacenttissuesfrom84patientswithstageItoIVccRCC.Usingpooledsamples1551proteins wereidentified,ofwhich290weredifferentiallyabundant,while783proteinswereidentifiedusingindivid…	Proteotranscriptomic Analysis, Clear-Cell Renal Cell Carcinoma, ccRCC tissues,	Raw datafrom individual sample tandem mass spectrometry runs were converted topeak list(mgfformat) using MSConvert;Raw datafrompooled sample tandemmass spectrometry runs wereconvertedto mzXML files usingReAdW (v1.1) andsearchedagainstthe Human UniProtKB SwissProt database (2011_3 release; 20,227sequencesplus the addition ofE.coli maltose-binding periplasmic protein, malE,P0AEX9)using X!Tandem (CY…	no	yes	no	no	no	no	yes
PXD003594	27991931	Oxidative stress downstream of mTORC1 but not AKT causes a proliferative defect in cancer cells resistant to PI3K inhibition	Human (Homo sapiens) [9606]	NCBITaxon:9606	MCF7 cells;G2 cells	na	CLO:0007606;EFO:0005746	label free	MS:1002038	trypsin	MS:1001251	2	10	25	10 ppm	25 mmu	oxidation (methionine), (N-terminal)Gln->pyroGlu;oxidation (methionine), (N-terminal)Gln->pyroGlu, phosphorylation (serine, threonine, tyrosine)	35#M,28#Q(N-term);35#M,28#Q(N-term),21#S,21#T,21#Y	carbamidomethylation (cysteine)	4#C	phosphoproteomics analysis	PRIDE:0000588	LTQ-Orbitrap XL system;Q Exactive Plus system	MS:1000556;MS:1002634	CID (collision induced dissociation);HCD (higher collision induced dissociation)	Compounds targeting phosphatidylinositol-3-kinase/mammalian target of rapamycin (PI3K/mTOR) signaling are being investigated in multiple clinical settings, but drug resistance may reduce their bene?t. Compound rechallenge after drug holidays can overcome such resistance, yet little is known about the impact of drug holidays on cell biochemistry. We found that PI3K inhibitor (PI3Ki)resistant cells…	proteomics, human, PI3K inhibition, mTORC1, cancer cells;phosphoproteomics,human, PI3K inhibition, mTORC1, cancer cells	MS/MS data was automated with Mascot Daemon 2.5.0. Mascot Distiller 2.5.1.0 was used to generate peaklist files (MGFs) and Mascot 2.5 search engine was used to match peaks to peptides comprised in proteins annotated in the SwissProt Database (SwissProt_2012Oct.fasta for proteomics or uniprot_sprot_2014_08.fasta for phosphoproteomics analysis)	no	yes	no	no	no	no	yes
PXD005292	28287265	Glycoproteins in Claudin-Low Breast Cancer Cell Lines Have a Unique Expression Profile	Human(Homo sapiens)[9606]	NCBITaxon:9606	Breast cancer cell lines (BT474, BT549, HCC1143, HCC1395, HCC1428, HCC1954, HCC1937, HCC38, HCC70, HS578T, MB157, MB231, MB436, MB468, MCF7, SKBR3, SUM149PT, SUM185, SUM229, T47D, and ZR751)	na	EFO:0002885,EFO:0001093,EFO:0001096,EFO:0001169,EFO:0002185,EFO:0001171,EFO:0001175,EFO:0001174,EFO:0001180,EFO:0001181,EFO:0001192	na	na	trypsin	MS:1001251	2	20;1600	0.1 ;0.8	20 ppm;1.6Da	0.1Da;0.8Da	deamidation(Asparagine,Glutamine),oxidation(Methionine)	7#N,7#Q,35#M	carbamidomethylation (Cysteine)	4#C	na	na	Q Exactive MS;LTQ MS	MS:1001911;MS:1000447	HCD;CID	we characterize the expression of glycoproteins in breast cell lines for the claudin-low subtype using liquid chromatography/tandem mass spectrometry.	breast cancer,cell lines,claudin,glycoprotein,mass spectrometry,supervised classification.	Multiple project;Multiple projects	PXD005390,PXD005292,PXD005295,PXD005339	yes	no	no	no	no	yes
PXD005755	29079528	Increased serotransferrin and ceruloplasmin turnover in diet-controlled patients with type 2 diabetes	Human(Homo sapiens)[9606]	NCBITaxon:9606	plasma	BTO:0000392	na	na;isotopic labelling	na;PRIDE:0000310	trypsin	MS:1001251	2	na	na	na	na	Oxidation (methionine);Oxidation (methionine),glycation(lysine),carboxymethyl (lysine), carboxyethyl (lysine), pyrraline (lysine ), pyrimidine( arginine) , hydroimidazolone( arginine)	35#M;35#M,41#K,4#K,378#K,435#K,1927#R,1#R	Carbamidomethylation (Cysteine)	4#C	shotgun proteomics	PRIDE:0000429	Q Exactive Plus hybrid quadrupole-Orbitrap mass spectrometer (Thermo Fisher Scientific) using an UltiMate 3000 RSLC nano-HPLC system	MS:1002634	na;HCD	In this study, shotgun proteomics and 2H2O-based metabolic labeling were used to characterize post-translational modifications and assess the kinetics of Trf and Cp in T2DM patients and matched controls in vivo. Six early lysine (Amadori) and one advanced arginine glycation were detected in Trf.	Serotransferrin; Ceruloplasmin; Non-enzymatic glycation; Deamidation; Oxidative stress; Iron metabolism; Type 2 diabetes mellitus; Proteome dynamics; Heavy water metabolic labeling; High resolution mass spectrometry; LC-MS/MS	LC-MS/MS data files were searched using Mascot software;Andromeda search engine was used within the MaxQuant software	no	yes	no	no	no	no	yes
PXD006607	30205043	Aberrant ERBB4-SRC Signaling as a Hallmarkof Group 4 Medulloblastoma Revealedby Integrative Phosphoproteomic Profiling;"Aberrant ERBB4-SRC Signaling as a Hallmarkof Group 4 Medulloblastoma Revealedby Integrative Phosphoproteomic Profiling"	Human(Homo sapiens)[9606]	NCBITaxon:9606	cancer cell	na	EFO:0001639	SILAC	MS:1002611	trypsin	MS:1001251	2	10	0.6	10 ppm	0.6Da	carbamidomethyl(cysteine),oxidation(methionine), Acetylation(N-terminal) heavy 13C615N2-Lysine (Lys8), and 13C615N4-Arginine (Arg10)	4#C,35#M,1#N-term,259#K,267#R	na	na	phosphoproteomics experiment;shotgun proteomics	PRIDE:0000588;PRIDE:0000429	Orbitrap fusion mass spectrometer	MS:1002416	HCD	In this article,we performed an integrated multi-omics characterization of primaryhuman medulloblastomas, including Dna methylation, copy-number analysis, Rna sequencing, proteomic and phosphoproteomic profiling	medullo blastoma, proteomics, multi-omics	Data were acquired using the Xcalibur software	no	yes	no	no	no	no	yes
PXD006996	29752379	Rapid Remodeling of the Host Epithelial CellProteome by the Listeriolysin O (LLO)Pore-forming Toxin	Human (Homo sapiens) [9606]	NCBITaxon:9606	HeLa cells, HepG2 cells	na	CLO:0003684,EFO:0001187	label free;SILAC	MS:1002038;MS:1002611	trypsin	MS:1001251	2	4.5	0.5	4.5 ppm	0.5Da	oxidation (methionine) , acetylation (protein N-terminal);acetylation(protein N-terminal)	35#M,1#N-term(Protein);1#N-term(Protein)	carbamidomethylation (cysteine);carbamidomethyl(cysteine) , oxidation (methionine)	4#C;4#C,35#M	shotgun proteomics	PRIDE:0000429	Q Exactive HF mass spectrometer;LTQ orbitrap velos mass spectrometer	MS:1002523;MS:1001742	na;CID	we focused on host proteome alterations in?duced by the toxin Listeriolysin O (LLO), secreted by thebacterial pathogen Listeria monocytogenes. We showedthat a short-term treatment with LLO remodels the hostcell proteome by specifically decreasing the abundance of149 proteins. The same decrease in host protein levelswas observed in different epithelial cell lines but not inmacrophages. We show in …	SILAC, LLO, UBE2N, PFO	this article has multiple projects ; Data analysis was performed with MaxQuant version 1.6.0.16 for the label-free analyses;;this article has multiple projects ; with MaxQuant (version 1.5.6.5) for the SILAC analyses	PXD009339	yes	no	no	no	no	yes
PXD007137	28991240	Polypharmacology-based ceritinib repurposing using integrated functional proteomics	Human (Homo sapiens) [9606]	NCBITaxon:9606	H650, H23, H3122 cells ;H650 cells	na	CLO:0008101,CLO:0008071,CLO:0037033;BTO:0004079	na;SILAC	na;MS:1002611	trypsin;na	MS:1001251;na	2;na	1100;na	0.8 ;na	1.1 Da;na	0.8 Da;na	carbamidomethylation (cysteine), oxidation (methionine);carbamidomethylation (cysteine), oxidation (methionine), phosphorylation (serine, threonine, tyrosine)	4#C,35#M;4#C,35#M,21#S,21#T,21#Y	na;13C6 (lysine), 13C6,15N4 (arginine)	na;188#K,267#R	AP-MS;phosphopeptide enrichment	PRIDE:0000431;PRIDE:0000587	electrospray ion trap mass spectrometer (LTQ Orbitrap);A nanoflow ultra high performance liquid chromatograph coupled to an electrospray bench top orbitrap mass spectrometer (Q-Exactive plus)	MS:1000449;MS:1002634	na	we here describe the ALK inhibitor ceritinib to have activity across several ALK -negative lung cancer cell lines and identify new targets and network-wide signaling effects. Combining pharmacological inhibitors and Rna interference revealed a polypharmacology mechanism involving the non-canonical targets IGF1R, FAK1 and RSK1/2. Mutating the downstream signaling hub YB1 protected cells from cerit…	polypharmacology, proteomics, affinity purification, phosphopeptide enrichment	Mascot searches were performed against the UniProt human database;Data were searched by MaxQuant v1.2.2.543?45 using the UniProt human database	no	yes	no	no	no	no	yes
PXD008012	30158526	In vivo phosphoproteomics reveals kinase activityprofiles that predict treatment outcome in triplenegative breast cancer;"In vivo phosphoproteomics reveals kinase activityprofiles that predict treatment outcome in triplenegative breast cancer"	Human (Homo sapiens) [9606]	NCBITaxon:9606	human triple negative breast cancer cell lines (MDA-MB- 231, MDA-MB-157, Hs578T, MDA-MB-468, HCC1937, HCC1143, HCC38, BT549, BT483, and MDA-MB-415)	na	CLO:0007634,CLO:0007632,CLO:0004009,CLO:0007641,CLO:0003645,CLO:0003630,CLO:0003655,EFO:0001096,EFO:0001095,CLO:0007637	LFQ(label-free quantitation)	MS:1002038	trypsin;lys-c,trypsin	MS:1001251;MS:1001251,MS:1001309	2	20;10	0.025 ;0.5	20 ppm;10 ppm	0.025Da;0.5Da	oxidation(methionine),acetylation(protein N-terminal), phosphorylation(serine,theronine,tyrosine)	35#M,1#N-term(Protein),21#S,21#T,21#Y	carbamidomethyl(cysteine)	4#C	phosphoproteomics;phosphopeptide enrichment	PRIDE:0000587	Q-Exactive plus mass spectrometer;LTQ orbitrap Elite	MS:1002634;MS:1001910	HCD;CID, HCD, ETD	we use high-throughput phosphoproteomics to build a functional TNBC taxonomy,A mass-spectrometry-to?immunohistochemistry translation step, assessing 2 independent validation sets, reveals 6kinases with preserved independent prognostic value.Insummary, the present study elucidates phosphosites and kinases implicated in TNBC andsuggests a target-based clinical classification system for TNBC.;"we us…	PTMs, TNBC,phosphoproteomics	na	no	yes	no	no	no	no	yes
PXD008513	29449567	Systematic analysis of protein turnover in primary cells	Human (Homo sapiens) [9606]	NCBITaxon:9606	monocytes	BTO:0000876	na	SILAC (stable isotope labeling using amino acid in a cell culture)	MS:1002611	trypsin	MS:1001251	na	4.5 ;10	0.02 ;0.02	4.5 ppm;10 ppm	20 ppm;20 mDa	oxidation (methionine), acetylation (protein N-terminal);oxidation (methionine), acetylation (protein N-terminal), SILAC heavy label (arginine, lysine)	35#M,1#N-term(Protein);35#M,1#N-term(Protein),267#R,259#K	carbamidomethylation (cysteine)	4#C	na	na	Ultimate3000 nanoRLSC coupled to Q Exactive plus;Q Exactive plus	MS:1002634	HCD (higher energy collisional dissociation)	This approach allows exact determination of protein half-lives ranging from 10 to >1000 h. We identified 4000-6000 proteins in several non-dividing cell types, corresponding to 9699 unique protein identifications over the entire data set. We observed similar protein half-lives in B-cells, natural killer cells and monocytes, whereas hepatocytes and mouse embryonic neurons show substantial differen…	SILAC, proteostatis, protein half-lives	Acquired data were processed with MaxQuant (Version1.5.8.0) using the settings generally recommended for SILAC quantification2 ; this article has multiple projects: PXD008511 (B-cells), PXD008512 (hepatocytes), PXD008513 (monocytes), PXD008514 (mouse neurons), PXD008515 (NK cells) and PXD008516 (THP1 cells);na	PXD008511,PXD008512,PXD008513,PXD008514,PXD008515,PXD008516	yes	no	no	no	no	yes
PXD008516	29449567	Systematic Analysis of Protein Turnover in Primary Cells	Human(Homo sapiens)[9606]	NCBITaxon:9606	THP-1 cells	na	EFO:0001253	SILAC	MS:1002611	trypsin	MS:1001251	na	4.5 ;10	0.02 ;0.02	4.5 ppm;10 ppm	20 ppm;20 mDa	oxidation (methionine),acetylation (N-terminal protein);Oxidation (methionine), Acetylation (N-terminal protein), SILAC heavy label ([13C6,15N4], Arginine), SILAC heavy label([13C6, 15N2], Lysine )	35#M,1#N-term(Protein);35#M,1#N-term(Protein),267#R,259#K,	Carbamidomethylation (Cysteine)	4#C	na	na	Ultimate3000 nanoRLSC coupled to a Q-Exactive plus	MS:1002634	HCD	Here we improve the precision and accuracy of peptide ion intensity-based quantification, enabling more accurate protein turnover determination in non-dividing cells by dynamic SILAC-based proteomics. This approach allows exact determination of protein half-lives ranging from 10 to >1000 h. We identified 4000-6000 proteins in several non-dividing cell types, corresponding to 9699 unique protein i…	mass spectrometry,post-translational modifications,	MaxQuant/multiple project;IsobarQuant/multiple project	PXD008511,PXD008512,PXD008513,PXD008514,PXD008515,PXD008516	yes	no	no	no	no	yes
PXD008720	30068331	Species comparison of liver proteomes reveals links to naked mole-rat longevity and human aging	Human (Homo sapiens) [9606], naked mole rat (Heterocephalus glaber) [10181]	NCBITaxon:9606,NCBITaxon:10181	liver	BTO:0000759	na	label free;TMT (tandem mass tag) labeling	MS:1002038;MS:1002615	trypsin	MS:1001251	2	20	0.5	20 ppm	0.5 Da	oxidation (methionine), acetylation (protein N-term);oxidation (methionine), acetyl (protein N-term)	35#M,1#N-term(Protein)	carbamidomethylation (cysteine)	4#C	bottom-up	PRIDE:0000428	Orbitrap Fusion Lumos	MS:1002732	HCD (higher energy collisional dissociation)	Here, we compared the livers of young and old long-lived naked mole-rats (NMRs) and the phylogenetically closely related, shorter-lived, guinea pigs using an integrated omics approach. Results: We found that NMR livers display a unique expression pattern of mitochondrial proteins that results in distinct metabolic features of their mitochondria. For instance, we observed a generally reduced respi…	naked mole-rat (NMR), longevity	this article consist cross species	no	yes	no	no	no	no	yes
PXD009603	30051838	Proteomic evidence of dietary sourcesin ancient dental calculus	Human(Homo sapiens)[9606]	NCBITaxon:9606	dental calculus	NCIT:C60715	na	na	na	trypsin	MS:1001251	1	10	0.07	10 ppm	0.07 Da	acetylation (N-terminal protein), deamidation (asparagine, glutamine), oxidation (methionine), propionamide (N-terminal), propionamide (lysine);acetylation (N-terminal protein), oxidation (methionine), deamidation (asparagine, glutamine), gln->pyroGlu	1#N-term(Protein),7#N,7#Q,35#M,24#N-term,24#K;1#N-term(Protein),35#M,7#N,7#Q,28#Q	propionamide (cysteine);carbamidomethylation	24#C;4#C	GASP (gel aided sample preparation protocol) {shotgun proteomics};FASP (filter-aided sample preparation protocol) {shotgun proteomics}	PRIDE:0000429	Q-Exactive HF mass spectrometer coupled to an ACQUITY UPLC M-Class system	MS:1002523	HCD (higher energy collisional dissociation)	In this study demonstrates that proteomic approachescan robustly identify foodstuffs in the archaeological record that aretypically under-represented due to their poor macroscopic preservation.	proteomics, dental calculus, dietary reconstruction, mass spectrometry, GASP;proteomics, dental calculus, dietary reconstruction, mass spectrometry, FASP	search parameter setting were obtained from PRIDE dataProcessingProtocol section ; LC MS/MS ion database searching was performed on Mascot against Uniprot and human oral microbiome database (HOMD) ; 38 existing datasets previously published in Warinner et al. [1] focussing on populations from the UK. Raw data were downloaded from ProteomeXchange (Accession ID: PXD001362)	no	yes	no	no	no	no	yes
PXD009707	30311792	Candidate Treponema pallidum biomarkersuncovered in urine from individuals withsyphilis using mass spectrometry	Human (Homo sapiens) [9606], Treponema pallidum	NCBITaxon:9606,NCBITaxon:160	urine	BTO:0001419	na	na	na	trypsin	MS:1001251	1	na;50	na;0.20	na;50 ppm	na;0.20 Da	oxidation(methionine), deamidation (asparagine, glutamine);oxidation(methionine)	35#M,7#N,7#Q;35#M	methylthio(cysteine);carbamidomethyl(cysteine)	39#C;4#C	shotgun proteomics	PRIDE:0000429	Synapt G2Si;MALDI-TOF/TOF MS/MS analysis	MS:1002726;MS:1000652	na;CID (collision induced dissociation)	In this study, we combined these complimentary DDA and DIA shotgun MS techniques to search for T. pallidumproteins in urine samples from individuals with active syphilis in order to identify with high sensitivity potentialbiomarkers for antigen assay development.	antigen test ,biomarker discovery, data-independent acquisition, mass spectrometry, proteomics ,syphilis ,Treponema pallidum, urine	ESI-Q-IM-TOF HDMSE experiments (henceforth referred to as HDMSE) were performed on ten pooled urine samples, five of which were technical replicates of the initial MALDI-TOF experimental set (see Table 2 for sample inclusion overview). In total, these experiments contained urine samples from 54 unique individuals with different active syphilis clinical stages and 6 control samples.;2D-LC-MALDI TO…	no	yes	no	no	no	no	yes
PXD010103	30262884	AP-4 vesicles contribute to spatial control of autophagy via RUSC-dependent peripheral delivery of ATG9A	Human(Homo sapiens)[9606]	NCBITaxon:9606	HeLa M cells, HEK 293ET cells, Cell line SH-SY5Y	na	CLO:0003692,CLO:0009015	Label free quantification; SILAC	MS:1002038;MS:1002611	na	na	na	na	na	na	na	na	na	na	na	na	na	(Q-Exactive HF19,20), Q-Exactive mass spectrometers	MS:1001911	na	Our study uncovers ATG9A traf?cking as a ubiquitous function of the AP-4 pathway. Furthermore, it provides a potential molecular pathomechanism of AP-4 de?ciency, through dysregulated spatial control of autophagy.	Transmembrane proteins, Accessory proteins, BIoID	Default parameters were used for all other settings	no	yes	no	no	no	no	yes
PXD010787	30217950	Functional Proteomics and Deep Network Interrogation Reveal a Complex Mechanism of Action of Midostaurin in Lung Cancer Cells	Human(Homo sapiens)[9606]	NCBITaxon:9606	A427, A549, H2170, HCC4006,PC9 cells (Lung Cancer Cell Line)	na	EFO:0002104,CLO:0001601,CLO:0008059,EFO:0002934	chemical labeling (TMT 6-plex)	MS:1002615	na;Trypsin/P	na;MS:1001313	na;2	20	0.05	20 ppm	0.05Da	Oxidation (methionine), Acetylation (N-terminal protein),Phosphorylation (serine, Threonine,Tyrosine);Carbamidomethylation(cysteine),oxidation(methionine)	35#M,1#N-term(Protein),21#S,21#T,21#Y;4#C,35#M	carbamidomethylation (Cysteine);na	4#C;na	Phosphoproteomics ;AP-MS	PRIDE:0000585;PRIDE:0000431	na;nanoelectrospray source-equipped bench top hybrid orbitrap mass spectrometer	na;MS:1002835	na	Our results demonstrate that combination of complementary functional proteomics approaches and subsequent network-based data integration can reveal novel insight into the complex mode of action of multi-kinase inhibitors, actionable targets for drug discovery and cancer vulnerabilities.	Cancer Biology; Chemical biology; Chemoproteomics; Mechanism of action; Phosphoproteome,Phosphoproteomics	multiple project	PXD009041,PXD010786	yes	no	no	no	no	yes
